# Supplementary material for: Preventive behaviors of COVID-19 during the COVID-19 pandemic among community-dwelling older adults in Thailand
Source: PeerJ. 2025 May 13;13:e19412. doi: 10.7717/peerj.19412 (PMC12083464; doi:10.7717/peerj.19412)
Supplement: Supplemental Information 4 [file peerj-13-19412-s004.xlsx]

## Sheet: S1 Data
Num	Prov	area	sex	age	age_gr	status_gr	Reli	Occ_gr	Incomes	Income_gr	Edu_gr	Health	NumD	Underlying_disease	BH1	BH2	BH3	BH4	BH_nor	BH_nor_gr‎‎	aver_nor	K1	K2	K3	K4	K5	K6	K7	K8	K9	K10	K11	K12	sum_K	aver_K	K_group	persen1	persen2	persen3	persen4	sum_persen	ave_persen	persev1	persev2	persev3	persev4	sum_persev	ave_persev	perB1
1	North	North	Male	64	60-69	Married	Buddhist	Unemployed	8000	1000 and over	Lower education (below bachelor)	Very good	3	Yes	4	4	4	4	16	1	4	1	1	0	1	1	0	1	1	1	1	1	1	10	0.833333	1	4	4	4	4	16	4	4	4	4	4	16	4	4
2	North	North	Female	69	60-69	Married	Buddhist	Unemployed	600	Less than 1000	Lower education (below bachelor)	Neutral	1	Yes	4	4	4	4	16	1	4	1	1	1	1	1	0	1	1	1	1	1	1	11	0.916667	1	4	4	4	4	16	4	4	4	4	4	16	4	4
3	North	North	Male	73	70 and over	Married	Buddhist	Unemployed	700	Less than 1000	Lower education (below bachelor)	Neutral	2	Yes	4	4	4	4	16	1	4	1	1	1	1	1	1	1	1	1	1	1	1	12	1	1	4	4	4	4	16	4	4	4	4	4	16	4	4
4	North	North	Male	75	70 and over	Divorced	Buddhist	Unemployed	3500	1000 and over	Lower education (below bachelor)	Good	0	No	4	4	4	4	16	1	4	1	1	0	1	1	1	1	1	1	1	1	1	11	0.916667	1	4	4	4	4	16	4	4	4	4	3	15	3.75	4
5	North	North	Female	75	70 and over	Married	Buddhist	Unemployed	3500	1000 and over	Lower education (below bachelor)	Good	2	Yes	4	3	4	4	15	1	3.75	1	1	1	1	1	1	1	1	1	1	1	1	12	1	1	4	4	4	4	16	4	4	4	4	4	16	4	4
6	North	North	Female	64	60-69	Divorced	Buddhist	Unemployed	3000	1000 and over	Lower education (below bachelor)	Very good	3	Yes	4	3	4	4	15	1	3.75	1	1	0	1	1	1	1	1	1	0	1	1	10	0.833333	1	4	4	4	4	16	4	4	4	4	3	15	3.75	4
7	North	North	Female	74	70 and over	Married	Buddhist	Non-govt. employee	3000	1000 and over	Uneducated	Bad	1	Yes	4	3	4	4	15	1	3.75	1	1	1	1	1	1	1	1	1	1	1	1	12	1	1	4	4	4	4	16	4	3	3	4	4	14	3.5	4
8	North	North	Female	77	70 and over	Married	Buddhist	Unemployed	4000	1000 and over	Lower education (below bachelor)	Neutral	2	Yes	4	3	4	4	15	1	3.75	1	1	1	1	1	1	1	1	1	0	1	1	11	0.916667	1	4	4	4	4	16	4	4	3	4	4	15	3.75	4
9	North	North	Male	64	60-69	Married	Buddhist	Non-govt. employee	4000	1000 and over	Lower education (below bachelor)	Bad	0	No	4	3	4	4	15	1	3.75	1	1	0	1	1	1	1	1	0	0	0	1	8	0.666667	0	4	4	4	4	16	4	4	4	4	3	15	3.75	4
10	North	North	Female	65	60-69	Divorced	Buddhist	Unemployed	4000	1000 and over	Uneducated	Good	2	Yes	4	3	4	4	15	1	3.75	1	1	0	1	1	0	1	1	1	1	1	1	10	0.833333	1	3	3	3	3	12	3	3	4	4	4	15	3.75	4
11	North	North	Male	75	70 and over	Married	Christian	Unemployed	5000	1000 and over	Lower education (below bachelor)	Good	1	Yes	4	3	4	4	15	1	3.75	1	1	0	1	1	1	1	1	1	1	1	1	11	0.916667	1	4	4	4	4	16	4	4	4	4	4	16	4	4
12	North	North	Female	75	70 and over	Married	Buddhist	Unemployed	3000	1000 and over	Lower education (below bachelor)	Neutral	1	Yes	4	3	4	4	15	1	3.75	1	1	0	1	1	1	1	0	1	1	0	1	9	0.75	0	4	4	4	4	16	4	4	4	4	4	16	4	4
13	North	North	Female	65	60-69	Single	Buddhist	Non-govt. employee	5000	1000 and over	Lower education (below bachelor)	Neutral	1	Yes	4	4	4	4	16	1	4	1	1	1	1	1	0	1	1	1	1	0	0	9	0.75	0	4	4	4	4	16	4	4	4	4	4	16	4	4
14	North	North	Male	74	70 and over	Married	Buddhist	Unemployed	1500	1000 and over	Lower education (below bachelor)	Neutral	0	No	4	4	3	4	15	1	3.75	1	1	0	1	1	1	1	1	1	0	0	1	9	0.75	0	4	4	4	4	16	4	4	3	4	4	15	3.75	4
15	North	North	Female	74	70 and over	Single	Buddhist	Unemployed	5000	1000 and over	Lower education (below bachelor)	Neutral	2	Yes	4	4	3	4	15	1	3.75	1	1	1	1	1	0	0	1	1	1	1	0	9	0.75	0	4	4	4	4	16	4	4	4	4	4	16	4	4
16	North	North	Female	75	70 and over	Married	Buddhist	Unemployed	700	Less than 1000	Lower education (below bachelor)	Neutral	1	Yes	4	4	3	4	15	1	3.75	1	1	1	1	1	1	1	1	1	1	0	1	11	0.916667	1	3	3	3	3	12	3	4	3	4	4	15	3.75	4
17	North	North	Female	75	70 and over	Divorced	Buddhist	Unemployed	800	Less than 1000	Lower education (below bachelor)	Very good	1	Yes	3	3	3	4	13	0	3.25	1	1	0	1	1	1	1	1	1	1	1	1	11	0.916667	1	4	4	4	4	16	4	4	3	4	4	15	3.75	4
18	North	North	Female	62	60-69	Married	Buddhist	Non-govt. employee	5000	1000 and over	Lower education (below bachelor)	Bad	0	No	3	4	3	4	14	1	3.5	1	1	1	1	0	1	1	1	1	1	1	1	11	0.916667	1	4	4	4	4	16	4	4	4	4	4	16	4	4
19	North	North	Female	67	60-69	Married	Buddhist	Govt. employee	15000	1000 and over	Lower education (below bachelor)	Neutral	0	No	3	3	3	3	12	0	3	1	1	1	1	1	1	1	0	1	1	1	1	11	0.916667	1	3	3	3	3	12	3	4	4	4	4	16	4	3
20	North	North	Female	66	60-69	Divorced	Buddhist	Non-govt. employee	4000	1000 and over	Lower education (below bachelor)	Neutral	1	Yes	3	4	3	4	14	1	3.5	1	1	1	1	1	0	1	1	1	1	1	1	11	0.916667	1	4	4	4	4	16	4	3	3	4	4	14	3.5	4
21	North	North	Female	74	70 and over	Divorced	Buddhist	Unemployed	1000	1000 and over	Lower education (below bachelor)	Good	2	Yes	3	3	4	3	13	0	3.25	1	1	1	1	1	1	0	1	1	0	1	0	9	0.75	0	3	3	3	3	12	3	3	4	4	4	15	3.75	3
22	North	North	Female	64	60-69	Divorced	Buddhist	Unemployed	3000	1000 and over	Lower education (below bachelor)	Neutral	1	Yes	3	4	4	4	15	1	3.75	1	1	0	1	1	0	1	1	1	1	1	1	10	0.833333	1	4	4	4	4	16	4	4	3	4	4	15	3.75	4
23	North	North	Female	68	60-69	Divorced	Buddhist	Unemployed	3000	1000 and over	Lower education (below bachelor)	Neutral	2	Yes	3	4	4	4	15	1	3.75	1	1	1	1	0	0	1	1	1	1	1	1	10	0.833333	1	3	4	4	4	15	3.75	4	4	4	4	16	4	4
24	North	North	Male	73	70 and over	Divorced	Buddhist	Unemployed	1500	1000 and over	Lower education (below bachelor)	Very good	1	Yes	3	4	4	4	15	1	3.75	1	1	0	1	1	1	1	1	1	0	1	1	10	0.833333	1	4	4	4	4	16	4	4	4	4	4	16	4	4
25	North	North	Female	61	60-69	Divorced	Buddhist	Non-govt. employee	5000	1000 and over	Lower education (below bachelor)	Good	0	No	3	4	4	4	15	1	3.75	1	1	1	1	1	0	1	1	1	1	1	1	11	0.916667	1	3	3	3	3	12	3	3	4	4	4	15	3.75	3
26	North	North	Female	62	60-69	Married	Buddhist	Non-govt. employee	5000	1000 and over	Lower education (below bachelor)	Neutral	1	Yes	4	4	4	4	16	1	4	1	1	0	1	1	0	1	1	1	1	1	1	10	0.833333	1	4	4	4	4	16	4	3	3	4	4	14	3.5	4
27	North	North	Female	74	70 and over	Divorced	Buddhist	Unemployed	1500	1000 and over	Lower education (below bachelor)	Very good	1	Yes	3	4	4	4	15	1	3.75	1	1	1	1	1	0	1	1	1	1	1	1	11	0.916667	1	4	4	4	4	16	4	4	4	3	3	14	3.5	4
28	North	North	Male	75	70 and over	Married	Buddhist	Unemployed	600	Less than 1000	Lower education (below bachelor)	Neutral	4	Yes	3	3	3	4	13	0	3.25	1	0	1	1	1	1	1	0	1	1	1	1	10	0.833333	1	4	4	4	4	16	4	4	4	4	4	16	4	4
29	North	North	Male	68	60-69	Married	Buddhist	Non-govt. employee	15000	1000 and over	Lower education (below bachelor)	Good	1	Yes	4	4	4	4	16	1	4	1	1	1	1	1	1	1	0	0	1	0	0	8	0.666667	0	4	4	4	4	16	4	4	3	4	4	15	3.75	4
30	North	North	Female	75	70 and over	Divorced	Buddhist	Unemployed	1500	1000 and over	Lower education (below bachelor)	Good	1	Yes	3	4	4	4	15	1	3.75	1	1	0	1	1	1	1	1	1	1	1	1	11	0.916667	1	3	4	4	4	15	3.75	3	4	4	4	15	3.75	4
31	North	North	Male	75	70 and over	Divorced	Buddhist	Unemployed	600	Less than 1000	Uneducated	Very good	1	Yes	3	4	4	4	15	1	3.75	1	1	1	1	1	1	1	1	1	1	0	1	11	0.916667	1	4	4	4	4	16	4	4	4	4	4	16	4	4
32	North	North	Male	68	60-69	Married	Christian	Unemployed	1000	1000 and over	Lower education (below bachelor)	Neutral	0	No	3	4	4	4	15	1	3.75	1	1	0	1	1	0	1	1	1	1	1	1	10	0.833333	1	3	3	3	3	12	3	2	2	4	4	12	3	4
33	North	North	Male	75	70 and over	Married	Buddhist	Unemployed	600	Less than 1000	Lower education (below bachelor)	Very good	2	Yes	3	4	4	4	15	1	3.75	1	1	1	1	1	1	1	1	1	1	1	1	12	1	1	4	4	4	4	16	4	4	4	4	4	16	4	4
34	North	North	Female	74	70 and over	Divorced	Christian	Unemployed	1200	1000 and over	Lower education (below bachelor)	Neutral	2	Yes	3	3	4	4	14	1	3.5	1	1	0	1	0	0	1	1	1	1	1	1	9	0.75	0	4	4	4	4	16	4	4	4	4	4	16	4	4
35	North	North	Male	70	70 and over	Single	Buddhist	Non-govt. employee	10000	1000 and over	Lower education (below bachelor)	Good	1	Yes	4	4	4	4	16	1	4	1	1	1	1	1	1	1	1	1	0	1	1	11	0.916667	1	4	4	4	4	16	4	4	4	4	4	16	4	4
36	North	North	Male	71	70 and over	Married	Buddhist	Non-govt. employee	15000	1000 and over	Lower education (below bachelor)	Good	1	Yes	3	4	4	4	15	1	3.75	1	1	1	1	0	1	1	1	1	0	1	1	10	0.833333	1	4	4	4	4	16	4	4	4	4	4	16	4	4
37	North	North	Female	65	60-69	Married	Christian	Unemployed	1600	1000 and over	Lower education (below bachelor)	Neutral	2	Yes	3	4	4	4	15	1	3.75	1	1	0	1	0	1	1	1	1	1	0	1	9	0.75	0	3	3	3	3	12	3	4	3	3	4	14	3.5	4
38	North	North	Female	71	70 and over	Married	Buddhist	Unemployed	600	Less than 1000	Lower education (below bachelor)	Neutral	3	Yes	3	4	4	4	15	1	3.75	1	1	1	1	1	1	1	1	1	0	1	1	11	0.916667	1	4	4	4	4	16	4	4	4	4	4	16	4	4
39	North	North	Female	74	70 and over	Divorced	Buddhist	Unemployed	1000	1000 and over	Lower education (below bachelor)	Good	2	Yes	3	4	4	4	15	1	3.75	1	1	1	1	1	1	0	0	1	1	1	1	10	0.833333	1	4	4	4	4	16	4	3	3	3	3	12	3	4
40	North	North	Male	75	70 and over	Married	Buddhist	Unemployed	700	Less than 1000	Lower education (below bachelor)	Very good	2	Yes	4	4	4	4	16	1	4	1	1	1	1	0	1	1	1	1	0	1	1	10	0.833333	1	4	4	4	4	16	4	4	4	4	4	16	4	4
41	North	North	Female	74	70 and over	Divorced	Buddhist	Unemployed	700	Less than 1000	Lower education (below bachelor)	Very good	2	Yes	3	4	4	4	15	1	3.75	1	1	1	1	0	0	1	1	1	0	1	1	9	0.75	0	4	4	4	4	16	4	4	4	4	4	16	4	4
42	North	North	Female	73	70 and over	Single	Buddhist	Non-govt. employee	9000	1000 and over	Lower education (below bachelor)	Neutral	3	Yes	3	4	4	4	15	1	3.75	1	1	1	1	1	1	1	1	1	0	1	1	11	0.916667	1	4	4	4	4	16	4	4	4	4	4	16	4	4
43	North	North	Male	73	70 and over	Divorced	Buddhist	Unemployed	600	Less than 1000	Lower education (below bachelor)	Very good	1	Yes	3	4	4	4	15	1	3.75	1	1	1	1	1	1	1	1	1	0	1	1	11	0.916667	1	4	4	4	4	16	4	4	4	4	4	16	4	4
44	North	North	Female	75	70 and over	Divorced	Buddhist	Unemployed	800	Less than 1000	Lower education (below bachelor)	Very good	1	Yes	3	4	4	4	15	1	3.75	1	1	1	1	1	1	1	1	1	1	1	1	12	1	1	4	4	4	4	16	4	2	2	2	2	8	2	4
45	North	North	Female	65	60-69	Divorced	Buddhist	Non-govt. employee	1500	1000 and over	Lower education (below bachelor)	Very good	2	Yes	3	4	4	4	15	1	3.75	1	1	1	1	1	0	1	1	1	1	0	0	9	0.75	0	3	3	3	3	12	3	4	4	4	4	16	4	4
46	North	North	Male	68	60-69	Married	Buddhist	Non-govt. employee	20000	1000 and over	Lower education (below bachelor)	Good	2	Yes	3	4	4	4	15	1	3.75	1	1	1	1	0	1	0	1	1	1	1	1	10	0.833333	1	4	4	4	4	16	4	4	4	4	4	16	4	4
47	North	North	Female	71	70 and over	Married	Buddhist	Unemployed	2000	1000 and over	Lower education (below bachelor)	Good	1	Yes	3	4	4	3	14	1	3.5	1	1	1	1	1	1	1	1	0	1	1	0	10	0.833333	1	4	4	4	4	16	4	4	4	4	4	16	4	4
48	North	North	Female	67	60-69	Single	Buddhist	Non-govt. employee	20000	1000 and over	Lower education (below bachelor)	Good	0	No	3	3	4	3	13	0	3.25	1	1	1	1	1	1	1	1	1	1	1	1	12	1	1	4	4	4	4	16	4	4	4	4	4	16	4	4
49	North	North	Female	67	60-69	Single	Buddhist	Non-govt. employee	9000	1000 and over	Lower education (below bachelor)	Neutral	1	Yes	3	4	4	4	15	1	3.75	1	1	1	1	1	1	1	1	1	0	1	1	11	0.916667	1	4	4	4	4	16	4	4	4	4	4	16	4	4
50	North	North	Female	65	60-69	Divorced	Buddhist	Non-govt. employee	15000	1000 and over	Lower education (below bachelor)	Good	1	Yes	3	4	4	4	15	1	3.75	1	1	1	1	1	1	1	1	1	1	1	1	12	1	1	4	4	4	4	16	4	4	4	4	4	16	4	4
51	North	North	Male	65	60-69	Divorced	Buddhist	Non-govt. employee	9000	1000 and over	Lower education (below bachelor)	Neutral	1	Yes	3	4	4	4	15	1	3.75	1	1	1	1	1	1	1	0	1	0	1	1	10	0.833333	1	4	4	4	4	16	4	4	4	4	4	16	4	4
52	North	North	Female	67	60-69	Married	Buddhist	Non-govt. employee	5000	1000 and over	Lower education (below bachelor)	Neutral	2	Yes	4	4	4	4	16	1	4	1	1	1	1	1	1	1	1	1	0	1	1	11	0.916667	1	3	4	4	4	15	3.75	4	4	4	4	16	4	4
53	North	North	Female	62	60-69	Divorced	Buddhist	Non-govt. employee	5000	1000 and over	Lower education (below bachelor)	Very good	1	Yes	4	3	4	3	14	1	3.5	1	1	1	1	1	1	1	1	1	1	1	1	12	1	1	4	4	4	3	15	3.75	4	4	4	4	16	4	4
54	North	North	Female	62	60-69	Divorced	Buddhist	Non-govt. employee	5000	1000 and over	Lower education (below bachelor)	Very good	1	Yes	4	3	4	3	14	1	3.5	1	1	1	1	1	1	1	1	1	1	1	1	12	1	1	4	4	4	4	16	4	4	4	4	4	16	4	4
55	North	North	Male	65	60-69	Married	Buddhist	Non-govt. employee	15000	1000 and over	Lower education (below bachelor)	Good	1	Yes	4	3	4	4	15	1	3.75	1	1	1	1	1	1	0	1	1	0	1	1	10	0.833333	1	4	4	3	4	15	3.75	4	4	4	4	16	4	4
56	North	North	Male	67	60-69	Divorced	Buddhist	Non-govt. employee	9000	1000 and over	Lower education (below bachelor)	Very good	1	Yes	4	3	3	3	13	0	3.25	1	0	1	1	1	1	1	1	0	1	1	1	10	0.833333	1	4	4	4	3	15	3.75	4	3	3	4	14	3.5	4
57	North	North	Male	61	60-69	Divorced	Buddhist	Unemployed	2000	1000 and over	Lower education (below bachelor)	Very good	1	Yes	4	4	3	4	15	1	3.75	1	1	1	1	1	1	1	1	1	1	1	1	12	1	1	4	4	4	3	15	3.75	3	3	3	4	13	3.25	4
58	North	North	Male	61	60-69	Single	Buddhist	Unemployed	1500	1000 and over	Lower education (below bachelor)	Very good	1	Yes	4	3	3	3	13	0	3.25	1	0	1	1	1	1	1	0	1	0	1	1	9	0.75	0	4	4	4	3	15	3.75	4	4	4	4	16	4	3
59	North	North	Female	63	60-69	Single	Buddhist	Govt. employee	35000	1000 and over	Higher education (above bachelor)	Good	1	Yes	4	3	3	4	14	1	3.5	1	1	1	1	1	1	1	1	1	1	0	1	11	0.916667	1	4	4	4	4	16	4	3	3	4	4	14	3.5	4
60	North	North	Female	67	60-69	Married	Buddhist	Govt. employee	32000	1000 and over	Bachelor	Neutral	1	Yes	4	3	3	3	13	0	3.25	1	1	1	1	1	1	1	1	1	1	1	0	11	0.916667	1	3	4	4	4	15	3.75	4	4	4	4	16	4	4
61	North	North	Male	64	60-69	Married	Buddhist	Non-govt. employee	2600	1000 and over	Lower education (below bachelor)	Good	1	Yes	3	4	4	4	15	1	3.75	1	1	1	1	1	1	1	1	1	1	1	1	12	1	1	4	4	4	4	16	4	4	4	4	4	16	4	4
62	North	North	Female	63	60-69	Divorced	Buddhist	Non-govt. employee	6500	1000 and over	Lower education (below bachelor)	Good	0	No	3	4	3	4	14	1	3.5	1	1	0	1	1	1	1	1	1	1	1	1	11	0.916667	1	4	4	4	4	16	4	4	4	4	4	16	4	4
63	North	North	Female	66	60-69	Divorced	Buddhist	Unemployed	1000	1000 and over	Lower education (below bachelor)	Good	2	Yes	3	4	3	3	13	0	3.25	1	1	1	1	1	1	1	1	1	0	1	1	11	0.916667	1	3	3	4	4	14	3.5	4	3	3	3	13	3.25	4
64	North	North	Male	75	70 and over	Divorced	Buddhist	Unemployed	1000	1000 and over	Lower education (below bachelor)	Good	1	Yes	3	3	3	4	13	0	3.25	1	1	0	0	1	1	1	1	1	0	1	1	9	0.75	0	4	4	4	4	16	4	4	4	4	4	16	4	4
65	North	North	Female	66	60-69	Married	Buddhist	Unemployed	1000	1000 and over	Lower education (below bachelor)	Neutral	3	Yes	3	4	4	4	15	1	3.75	1	1	1	1	1	1	1	1	1	0	1	1	11	0.916667	1	4	4	4	4	16	4	4	4	4	4	16	4	4
66	North	North	Female	71	70 and over	Divorced	Buddhist	Unemployed	1000	1000 and over	Lower education (below bachelor)	Good	2	Yes	3	3	4	3	13	0	3.25	1	1	1	1	1	0	1	1	1	1	1	1	11	0.916667	1	4	4	4	4	16	4	4	4	4	4	16	4	4
67	North	North	Female	73	70 and over	Divorced	Buddhist	Non-govt. employee	1700	1000 and over	Lower education (below bachelor)	Good	1	Yes	3	4	3	4	14	1	3.5	1	1	1	1	1	1	1	1	1	0	0	0	9	0.75	0	4	4	4	4	16	4	3	4	4	4	15	3.75	4
68	North	North	Female	63	60-69	Divorced	Buddhist	Unemployed	1000	1000 and over	Lower education (below bachelor)	Good	1	Yes	3	4	3	4	14	1	3.5	1	1	1	1	1	1	1	1	1	1	1	1	12	1	1	4	4	4	3	15	3.75	4	4	4	4	16	4	4
69	North	North	Male	72	70 and over	Divorced	Buddhist	Unemployed	1500	1000 and over	Lower education (below bachelor)	Good	1	Yes	3	3	3	4	13	0	3.25	1	1	1	1	1	1	1	1	1	1	1	0	11	0.916667	1	4	4	3	4	15	3.75	3	3	3	3	12	3	4
70	North	North	Female	73	70 and over	Married	Buddhist	Non-govt. employee	3000	1000 and over	Lower education (below bachelor)	Very good	0	No	2	4	3	4	13	0	3.25	0	1	1	0	1	1	1	1	1	1	1	1	10	0.833333	1	4	4	4	3	15	3.75	4	4	4	4	16	4	4
71	North	North	Female	75	70 and over	Divorced	Buddhist	Unemployed	1500	1000 and over	Lower education (below bachelor)	Very good	1	Yes	3	3	3	3	12	0	3	1	1	1	0	0	0	1	1	1	0	1	1	8	0.666667	0	3	3	4	4	14	3.5	4	4	4	4	16	4	4
72	North	North	Male	75	70 and over	Married	Buddhist	Non-govt. employee	5000	1000 and over	Lower education (below bachelor)	Neutral	4	Yes	4	4	4	4	16	1	4	1	1	1	1	1	1	1	1	1	1	1	0	11	0.916667	1	4	4	4	4	16	4	4	4	4	4	16	4	4
73	North	North	Female	63	60-69	Married	Buddhist	Non-govt. employee	1500	1000 and over	Lower education (below bachelor)	Good	2	Yes	4	4	3	4	15	1	3.75	1	1	1	1	1	1	1	1	1	1	1	1	12	1	1	4	4	3	3	14	3.5	4	4	4	4	16	4	4
74	North	North	Female	67	60-69	Married	Buddhist	Non-govt. employee	3200	1000 and over	Lower education (below bachelor)	Good	0	No	4	4	3	4	15	1	3.75	1	1	1	1	1	1	1	1	1	1	1	1	12	1	1	4	4	4	3	15	3.75	3	4	4	4	15	3.75	4
75	North	North	Male	75	70 and over	Married	Buddhist	Unemployed	1000	1000 and over	Lower education (below bachelor)	Very good	3	Yes	3	3	3	3	12	0	3	1	1	1	1	1	1	1	1	1	1	1	1	12	1	1	4	4	4	4	16	4	4	4	4	4	16	4	4
76	North	North	Male	68	60-69	Married	Buddhist	Unemployed	1400	1000 and over	Lower education (below bachelor)	Good	1	Yes	4	4	4	4	16	1	4	1	1	1	1	1	1	1	1	1	0	0	1	10	0.833333	1	3	3	4	4	14	3.5	2	3	3	4	12	3	4
77	North	North	Female	72	70 and over	Divorced	Buddhist	Unemployed	1500	1000 and over	Lower education (below bachelor)	Very good	2	Yes	3	3	3	3	12	0	3	1	1	1	1	1	0	1	1	0	0	1	1	9	0.75	0	3	4	4	3	14	3.5	3	4	4	4	15	3.75	3
78	North	North	Male	75	70 and over	Married	Buddhist	Unemployed	2500	1000 and over	Lower education (below bachelor)	Good	1	Yes	4	3	3	3	13	0	3.25	1	1	1	1	1	1	1	1	1	1	1	1	12	1	1	4	4	4	3	15	3.75	4	4	4	4	16	4	4
79	North	North	Male	65	60-69	Divorced	Buddhist	Non-govt. employee	3500	1000 and over	Lower education (below bachelor)	Good	1	Yes	4	4	4	4	16	1	4	1	1	1	1	1	1	1	1	1	1	1	1	12	1	1	4	3	4	3	14	3.5	4	4	4	4	16	4	3
80	North	North	Female	61	60-69	Married	Buddhist	Non-govt. employee	3000	1000 and over	Lower education (below bachelor)	Good	2	Yes	3	3	3	3	12	0	3	1	1	1	1	1	1	1	1	1	1	1	1	12	1	1	3	4	3	3	13	3.25	4	4	4	4	16	4	3
81	North	North	Female	65	60-69	Married	Buddhist	Non-govt. employee	3500	1000 and over	Lower education (below bachelor)	Good	2	Yes	3	3	3	3	12	0	3	1	1	1	1	1	1	1	1	1	1	1	1	12	1	1	4	4	4	4	16	4	4	4	4	4	16	4	3
82	North	North	Female	63	60-69	Married	Buddhist	Non-govt. employee	3000	1000 and over	Lower education (below bachelor)	Good	1	Yes	3	3	3	3	12	0	3	1	1	1	1	1	0	1	1	1	1	1	1	11	0.916667	1	4	4	3	3	14	3.5	4	4	4	4	16	4	4
83	North	North	Male	65	60-69	Married	Buddhist	Non-govt. employee	5000	1000 and over	Lower education (below bachelor)	Good	2	Yes	3	3	3	4	13	0	3.25	1	1	1	1	1	0	1	1	0	1	1	1	10	0.833333	1	4	4	3	3	14	3.5	4	4	4	4	16	4	4
84	North	North	Male	74	70 and over	Married	Buddhist	Unemployed	3000	1000 and over	Lower education (below bachelor)	Good	1	Yes	4	4	3	3	14	1	3.5	1	1	1	1	1	0	1	1	1	1	1	1	11	0.916667	1	4	4	4	4	16	4	3	4	4	4	15	3.75	4
85	North	North	Male	74	70 and over	Married	Buddhist	Unemployed	1000	1000 and over	Lower education (below bachelor)	Good	1	Yes	4	4	3	3	14	1	3.5	1	1	1	1	1	0	0	1	1	1	1	1	10	0.833333	1	4	4	4	3	15	3.75	4	3	4	4	15	3.75	4
86	North	North	Female	63	60-69	Married	Buddhist	Unemployed	1000	1000 and over	Lower education (below bachelor)	Good	1	Yes	3	3	3	3	12	0	3	1	1	1	1	1	1	1	1	1	1	1	1	12	1	1	4	4	3	3	14	3.5	4	3	3	3	13	3.25	4
87	North	North	Female	64	60-69	Married	Buddhist	Non-govt. employee	15000	1000 and over	Lower education (below bachelor)	Good	1	Yes	3	4	3	3	13	0	3.25	1	1	1	1	1	1	1	0	1	1	1	1	11	0.916667	1	4	4	4	4	16	4	3	4	4	4	15	3.75	4
88	North	North	Male	67	60-69	Married	Buddhist	Govt. employee	25000	1000 and over	Bachelor	Good	2	Yes	3	4	2	3	12	0	3	1	1	1	1	1	1	1	1	1	1	1	1	12	1	1	4	4	4	3	15	3.75	3	4	4	4	15	3.75	3
89	North	North	Female	65	60-69	Divorced	Buddhist	Non-govt. employee	15000	1000 and over	Lower education (below bachelor)	Good	2	Yes	4	3	2	3	12	0	3	1	1	1	1	1	1	1	1	1	1	1	1	12	1	1	4	4	4	4	16	4	3	2	4	4	13	3.25	4
90	North	North	Female	63	60-69	Married	Buddhist	Non-govt. employee	20000	1000 and over	Lower education (below bachelor)	Good	2	Yes	3	4	2	3	12	0	3	1	1	1	1	1	0	1	1	0	0	1	1	9	0.75	0	4	4	4	4	16	4	3	3	4	4	14	3.5	4
91	North	North	Female	65	60-69	Married	Buddhist	Govt. employee	25000	1000 and over	Bachelor	Neutral	0	No	4	3	3	3	13	0	3.25	1	1	1	1	1	1	1	1	1	1	1	1	12	1	1	4	3	4	4	15	3.75	3	4	4	3	14	3.5	4
92	North	North	Female	67	60-69	Married	Buddhist	Govt. employee	25000	1000 and over	Bachelor	Very good	2	Yes	4	3	3	3	13	0	3.25	1	1	1	1	1	1	1	1	1	1	1	1	12	1	1	4	4	3	4	15	3.75	4	2	3	4	13	3.25	4
93	North	North	Female	62	60-69	Married	Buddhist	Non-govt. employee	15000	1000 and over	Lower education (below bachelor)	Good	1	Yes	4	4	2	3	13	0	3.25	1	1	1	1	1	1	1	1	1	1	1	1	12	1	1	4	4	4	4	16	4	4	4	4	4	16	4	4
94	North	North	Female	62	60-69	Married	Buddhist	Non-govt. employee	15000	1000 and over	Lower education (below bachelor)	Neutral	0	No	4	4	2	3	13	0	3.25	1	1	1	1	1	1	1	1	1	1	1	1	12	1	1	4	4	3	4	15	3.75	3	4	4	3	14	3.5	4
95	North	North	Female	64	60-69	Married	Buddhist	Non-govt. employee	10000	1000 and over	Lower education (below bachelor)	Good	1	Yes	4	3	3	3	13	0	3.25	1	1	1	1	1	1	1	1	1	1	1	1	12	1	1	4	4	4	4	16	4	4	4	4	4	16	4	4
96	North	North	Female	67	60-69	Married	Buddhist	Govt. employee	28000	1000 and over	Bachelor	Good	2	Yes	4	3	2	3	12	0	3	1	1	1	1	1	1	1	1	1	1	1	1	12	1	1	4	4	3	3	14	3.5	4	4	4	4	16	4	4
97	North	North	Male	65	60-69	Married	Buddhist	Non-govt. employee	15000	1000 and over	Bachelor	Good	2	Yes	4	3	2	3	12	0	3	1	1	1	1	1	1	1	1	1	1	0	1	11	0.916667	1	4	4	4	3	15	3.75	4	4	4	4	16	4	4
98	North	North	Male	63	60-69	Married	Buddhist	Non-govt. employee	15000	1000 and over	Lower education (below bachelor)	Good	1	Yes	3	3	3	3	12	0	3	1	1	1	1	1	1	0	1	1	1	1	1	11	0.916667	1	4	4	4	4	16	4	4	3	3	3	13	3.25	4
99	North	North	Male	64	60-69	Married	Buddhist	Govt. employee	25000	1000 and over	Higher education (above bachelor)	Good	2	Yes	3	3	3	3	12	0	3	1	1	1	1	1	1	1	1	1	0	1	1	11	0.916667	1	4	4	4	4	16	4	4	4	4	4	16	4	4
100	North	North	Female	68	60-69	Married	Buddhist	Non-govt. employee	20000	1000 and over	Lower education (below bachelor)	Neutral	0	No	3	3	3	3	12	0	3	1	1	1	1	1	0	1	1	1	1	1	1	11	0.916667	1	4	4	4	3	15	3.75	4	4	4	4	16	4	4
101	North	North	Male	70	70 and over	Married	Buddhist	Non-govt. employee	30000	1000 and over	Bachelor	Good	2	Yes	3	3	3	3	12	0	3	1	1	1	1	1	1	1	1	1	1	1	1	12	1	1	4	4	4	3	15	3.75	4	4	3	4	15	3.75	4
102	North	North	Male	68	60-69	Divorced	Buddhist	Non-govt. employee	12000	1000 and over	Lower education (below bachelor)	Good	1	Yes	3	4	3	3	13	0	3.25	1	1	1	1	1	1	0	0	1	1	1	1	10	0.833333	1	4	4	4	4	16	4	4	3	4	4	15	3.75	4
103	North	North	Female	66	60-69	Married	Buddhist	Non-govt. employee	12000	1000 and over	Lower education (below bachelor)	Good	1	Yes	3	4	2	4	13	0	3.25	1	1	1	1	1	1	0	0	1	0	1	1	9	0.75	0	4	4	4	3	15	3.75	4	4	4	4	16	4	4
104	North	North	Female	68	60-69	Married	Buddhist	Non-govt. employee	18000	1000 and over	Bachelor	Good	1	Yes	3	4	2	3	12	0	3	1	1	1	1	1	1	0	1	1	0	0	0	8	0.666667	0	4	4	4	4	16	4	4	4	4	4	16	4	4
105	North	North	Female	65	60-69	Married	Buddhist	Non-govt. employee	14000	1000 and over	Lower education (below bachelor)	Good	0	No	3	3	3	3	12	0	3	1	1	1	1	1	1	0	0	1	0	1	1	9	0.75	0	4	4	4	4	16	4	2	2	4	4	12	3	4
106	North	North	Male	64	60-69	Married	Buddhist	Non-govt. employee	15000	1000 and over	Bachelor	Good	1	Yes	3	3	3	3	12	0	3	1	1	1	1	1	1	0	1	1	1	1	1	11	0.916667	1	4	4	4	4	16	4	4	4	4	4	16	4	4
107	North	North	Female	68	60-69	Divorced	Buddhist	Non-govt. employee	13000	1000 and over	Bachelor	Good	2	Yes	4	4	2	3	13	0	3.25	1	1	1	1	1	1	0	1	1	0	1	1	10	0.833333	1	3	3	3	3	12	3	4	4	4	3	15	3.75	4
108	North	North	Female	61	60-69	Married	Buddhist	Non-govt. employee	17500	1000 and over	Lower education (below bachelor)	Good	1	Yes	4	3	3	3	13	0	3.25	1	1	1	1	1	1	1	1	1	1	1	1	12	1	1	4	3	4	3	14	3.5	4	4	4	4	16	4	4
109	North	North	Female	61	60-69	Divorced	Buddhist	Non-govt. employee	6000	1000 and over	Lower education (below bachelor)	Good	2	Yes	4	3	3	3	13	0	3.25	1	1	1	1	1	0	0	1	1	1	1	1	10	0.833333	1	3	3	3	3	12	3	3	3	3	3	12	3	4
110	North	North	Female	70	70 and over	Married	Buddhist	Non-govt. employee	14000	1000 and over	Lower education (below bachelor)	Good	2	Yes	4	3	3	3	13	0	3.25	1	1	1	1	1	1	0	1	1	1	1	1	11	0.916667	1	4	3	3	3	13	3.25	2	3	3	4	12	3	4
111	North	North	Male	65	60-69	Married	Buddhist	Non-govt. employee	15000	1000 and over	Bachelor	Neutral	0	No	4	3	3	3	13	0	3.25	1	1	1	1	1	1	1	1	1	1	1	1	12	1	1	4	4	4	4	16	4	4	4	4	3	15	3.75	4
112	North	North	Male	64	60-69	Married	Buddhist	Non-govt. employee	25000	1000 and over	Bachelor	Good	2	Yes	4	3	3	3	13	0	3.25	1	1	1	1	1	1	0	1	1	1	1	1	11	0.916667	1	4	4	4	3	15	3.75	3	3	4	4	14	3.5	4
113	North	North	Female	64	60-69	Married	Buddhist	Govt. employee	25000	1000 and over	Higher education (above bachelor)	Good	2	Yes	3	3	3	3	12	0	3	1	1	1	1	1	1	0	1	1	1	1	1	11	0.916667	1	4	4	3	3	14	3.5	4	3	4	3	14	3.5	4
114	North	North	Female	65	60-69	Married	Buddhist	Non-govt. employee	10000	1000 and over	Bachelor	Good	1	Yes	3	3	2	3	11	0	2.75	1	1	1	1	1	1	1	1	1	1	1	1	12	1	1	3	3	3	3	12	3	3	4	3	4	14	3.5	4
115	North	North	Female	72	70 and over	Married	Buddhist	Govt. employee	28000	1000 and over	Higher education (above bachelor)	Neutral	0	No	3	4	3	3	13	0	3.25	1	1	1	1	1	0	1	1	1	1	1	1	11	0.916667	1	4	4	4	4	16	4	4	3	3	4	14	3.5	4
116	North	North	Male	63	60-69	Married	Buddhist	Govt. employee	28000	1000 and over	Higher education (above bachelor)	Good	1	Yes	3	3	3	3	12	0	3	1	1	0	1	1	1	0	1	1	1	1	1	10	0.833333	1	4	4	4	4	16	4	4	4	4	4	16	4	4
117	North	North	Male	70	70 and over	Divorced	Buddhist	Unemployed	6000	1000 and over	Lower education (below bachelor)	Good	2	Yes	3	4	3	3	13	0	3.25	1	1	1	1	1	0	1	1	1	0	0	1	9	0.75	0	4	4	4	4	16	4	4	3	4	4	15	3.75	3
118	North	North	Male	67	60-69	Married	Buddhist	Non-govt. employee	25000	1000 and over	Higher education (above bachelor)	Good	3	Yes	3	3	3	3	12	0	3	1	1	1	1	0	0	1	1	1	1	0	0	8	0.666667	0	4	4	4	4	16	4	4	4	4	4	16	4	4
119	North	North	Female	69	60-69	Married	Buddhist	Govt. employee	25000	1000 and over	Higher education (above bachelor)	Good	3	Yes	3	3	3	3	12	0	3	1	1	1	1	1	0	1	1	1	0	0	0	8	0.666667	0	4	4	4	4	16	4	4	4	4	4	16	4	4
120	North	North	Female	63	60-69	Divorced	Buddhist	Non-govt. employee	30000	1000 and over	Bachelor	Good	2	Yes	3	3	3	3	12	0	3	1	1	0	1	1	0	1	1	1	0	1	1	9	0.75	0	4	4	4	4	16	4	4	4	4	4	16	4	4
121	North	North	Female	65	60-69	Married	Buddhist	Non-govt. employee	14000	1000 and over	Lower education (below bachelor)	Good	1	Yes	3	3	3	3	12	0	3	1	1	1	1	1	1	0	1	1	0	1	1	10	0.833333	1	4	3	4	4	15	3.75	4	3	3	4	14	3.5	4
122	North	North	Male	60	60-69	Married	Buddhist	Non-govt. employee	25000	1000 and over	Bachelor	Neutral	0	No	4	4	3	3	14	1	3.5	1	1	1	1	0	1	1	1	1	1	1	1	11	0.916667	1	3	4	4	4	15	3.75	4	4	4	4	16	4	4
123	North	North	Male	60	60-69	Married	Buddhist	Non-govt. employee	25000	1000 and over	Bachelor	Neutral	0	No	4	4	3	3	14	1	3.5	1	1	1	1	1	1	0	1	1	1	1	1	11	0.916667	1	3	3	4	4	14	3.5	4	4	4	4	16	4	4
124	North	North	Male	68	60-69	Married	Buddhist	Govt. employee	25000	1000 and over	Bachelor	Good	2	Yes	4	4	3	3	14	1	3.5	1	1	1	1	1	1	0	1	1	0	1	1	10	0.833333	1	3	3	3	3	12	3	4	4	3	4	15	3.75	4
125	North	North	Female	61	60-69	Married	Buddhist	Non-govt. employee	10000	1000 and over	Lower education (below bachelor)	Good	2	Yes	4	4	3	3	14	1	3.5	1	1	1	1	1	0	1	1	1	1	1	1	11	0.916667	1	3	3	3	3	12	3	4	4	4	4	16	4	4
126	North	North	Male	62	60-69	Married	Buddhist	Non-govt. employee	13000	1000 and over	Lower education (below bachelor)	Good	1	Yes	4	3	3	3	13	0	3.25	1	1	0	1	1	1	1	1	1	1	1	1	11	0.916667	1	4	3	4	4	15	3.75	4	4	4	4	16	4	4
127	North	North	Male	71	70 and over	Divorced	Buddhist	Non-govt. employee	28000	1000 and over	Bachelor	Good	2	Yes	4	3	3	3	13	0	3.25	1	1	0	1	1	1	1	1	1	1	1	1	11	0.916667	1	3	4	4	4	15	3.75	4	4	4	4	16	4	4
128	North	North	Male	63	60-69	Single	Buddhist	Non-govt. employee	12000	1000 and over	Lower education (below bachelor)	Neutral	0	No	4	4	4	3	15	1	3.75	1	1	1	1	0	1	1	1	1	1	1	1	11	0.916667	1	3	3	3	3	12	3	4	4	4	4	16	4	4
129	North	North	Female	60	60-69	Single	Buddhist	Non-govt. employee	12000	1000 and over	Lower education (below bachelor)	Good	1	Yes	4	3	3	3	13	0	3.25	1	1	0	1	1	1	1	1	1	1	1	1	11	0.916667	1	3	3	3	4	13	3.25	4	4	4	4	16	4	4
130	North	North	Female	75	70 and over	Divorced	Buddhist	Non-govt. employee	13000	1000 and over	Lower education (below bachelor)	Good	2	Yes	3	3	3	3	12	0	3	1	1	1	1	1	1	1	1	1	0	1	1	11	0.916667	1	4	3	3	3	13	3.25	4	3	4	4	15	3.75	4
131	North	North	Female	66	60-69	Divorced	Buddhist	Non-govt. employee	5000	1000 and over	Lower education (below bachelor)	Good	1	Yes	3	3	3	3	12	0	3	1	1	0	1	1	1	1	1	1	1	1	1	11	0.916667	1	4	4	4	3	15	3.75	4	4	4	4	16	4	4
132	North	North	Female	65	60-69	Divorced	Buddhist	Non-govt. employee	12000	1000 and over	Lower education (below bachelor)	Good	2	Yes	3	3	3	3	12	0	3	1	1	1	1	1	0	0	1	0	1	1	1	9	0.75	0	3	3	3	4	13	3.25	3	3	4	4	14	3.5	4
133	North	North	Male	70	70 and over	Married	Buddhist	Unemployed	1500	1000 and over	Lower education (below bachelor)	Good	3	Yes	3	3	3	3	12	0	3	1	1	1	1	1	0	1	1	1	0	0	0	8	0.666667	0	4	3	3	4	14	3.5	4	3	4	4	15	3.75	4
134	North	North	Female	60	60-69	Divorced	Buddhist	Non-govt. employee	16000	1000 and over	Lower education (below bachelor)	Good	2	Yes	3	4	3	3	13	0	3.25	1	1	0	1	1	0	1	1	1	1	1	1	10	0.833333	1	4	4	4	4	16	4	4	3	3	4	14	3.5	4
135	North	North	Male	60	60-69	Married	Christian	Non-govt. employee	20000	1000 and over	Bachelor	Neutral	0	No	3	4	3	3	13	0	3.25	1	1	1	1	1	1	0	1	1	1	1	1	11	0.916667	1	4	4	3	4	15	3.75	3	3	4	4	14	3.5	4
136	North	North	Female	66	60-69	Married	Christian	Non-govt. employee	18000	1000 and over	Lower education (below bachelor)	Good	2	Yes	4	3	3	3	13	0	3.25	1	1	1	1	1	1	0	1	1	1	1	1	11	0.916667	1	4	4	4	4	16	4	4	3	4	3	14	3.5	4
137	North	North	Female	63	60-69	Married	Buddhist	Non-govt. employee	10000	1000 and over	Lower education (below bachelor)	Very good	2	Yes	4	4	3	3	14	1	3.5	1	1	1	1	1	1	1	1	1	1	1	1	12	1	1	4	3	4	4	15	3.75	3	3	4	4	14	3.5	4
138	North	North	Female	63	60-69	Married	Christian	Non-govt. employee	14000	1000 and over	Lower education (below bachelor)	Very good	2	Yes	4	4	4	3	15	1	3.75	1	1	1	1	1	1	1	1	0	1	1	1	11	0.916667	1	4	3	3	4	14	3.5	4	3	3	3	13	3.25	4
139	North	North	Female	62	60-69	Single	Buddhist	Non-govt. employee	12000	1000 and over	Lower education (below bachelor)	Neutral	0	No	4	4	3	3	14	1	3.5	1	1	1	1	1	0	1	1	1	1	1	1	11	0.916667	1	4	4	4	3	15	3.75	4	4	4	4	16	4	4
140	North	North	Male	63	60-69	Married	Buddhist	Non-govt. employee	24500	1000 and over	Higher education (above bachelor)	Good	1	Yes	4	4	3	3	14	1	3.5	1	1	1	1	1	1	0	1	1	1	1	1	11	0.916667	1	4	4	3	3	14	3.5	3	4	4	3	14	3.5	4
141	North	North	Female	63	60-69	Married	Buddhist	Non-govt. employee	15000	1000 and over	Lower education (below bachelor)	Good	3	Yes	4	4	3	3	14	1	3.5	1	1	1	1	1	1	0	1	1	1	1	1	11	0.916667	1	4	3	3	3	13	3.25	4	4	4	4	16	4	4
142	North	North	Male	68	60-69	Married	Buddhist	Non-govt. employee	25000	1000 and over	Bachelor	Good	2	Yes	4	4	3	3	14	1	3.5	1	1	1	1	1	1	1	1	1	1	1	1	12	1	1	3	3	3	3	12	3	4	4	4	4	16	4	4
143	North	North	Male	66	60-69	Married	Buddhist	Non-govt. employee	14000	1000 and over	Lower education (below bachelor)	Good	3	Yes	4	4	3	3	14	1	3.5	1	1	1	1	1	1	0	1	1	1	1	1	11	0.916667	1	3	3	3	3	12	3	4	4	4	4	16	4	4
144	North	North	Male	62	60-69	Married	Buddhist	Govt. employee	28000	1000 and over	Higher education (above bachelor)	Good	2	Yes	4	4	3	3	14	1	3.5	1	1	1	1	1	1	1	1	1	1	1	1	12	1	1	4	3	4	4	15	3.75	3	3	3	3	12	3	4
145	North	North	Female	63	60-69	Divorced	Buddhist	Non-govt. employee	15000	1000 and over	Lower education (below bachelor)	Good	1	Yes	4	4	3	3	14	1	3.5	1	1	1	1	1	1	1	1	1	1	1	1	12	1	1	4	4	3	3	14	3.5	4	4	4	4	16	4	3
146	North	North	Male	62	60-69	Single	Buddhist	Non-govt. employee	12000	1000 and over	Bachelor	Good	1	Yes	4	4	3	3	14	1	3.5	1	1	1	1	1	1	0	1	1	1	1	1	11	0.916667	1	3	4	4	3	14	3.5	4	4	4	4	16	4	4
147	North	North	Male	67	60-69	Married	Buddhist	Govt. employee	32000	1000 and over	Higher education (above bachelor)	Good	1	Yes	4	4	3	3	14	1	3.5	1	1	1	1	0	1	1	1	1	1	1	1	11	0.916667	1	4	3	4	4	15	3.75	4	4	4	3	15	3.75	3
148	North	North	Female	66	60-69	Married	Buddhist	Unemployed	6000	1000 and over	Lower education (below bachelor)	Good	2	Yes	4	4	3	3	14	1	3.5	1	1	1	1	1	1	0	1	1	1	1	1	11	0.916667	1	4	4	4	4	16	4	4	4	4	4	16	4	3
149	North	North	Female	62	60-69	Married	Buddhist	Unemployed	1500	1000 and over	Lower education (below bachelor)	Very good	2	Yes	4	3	3	3	13	0	3.25	1	1	1	1	1	0	0	1	1	1	1	1	10	0.833333	1	4	4	4	4	16	4	4	4	4	4	16	4	4
150	North	North	Female	64	60-69	Married	Buddhist	Non-govt. employee	10000	1000 and over	Lower education (below bachelor)	Good	2	Yes	4	4	3	3	14	1	3.5	1	1	1	1	1	1	0	1	1	0	1	1	10	0.833333	1	4	4	3	3	14	3.5	4	4	4	4	16	4	4
151	North	North	Male	68	60-69	Married	Buddhist	Non-govt. employee	12000	1000 and over	Lower education (below bachelor)	Good	2	Yes	4	4	3	3	14	1	3.5	1	1	1	1	1	0	1	1	1	0	1	1	10	0.833333	1	4	4	4	4	16	4	2	2	4	4	12	3	4
152	North	North	Female	72	70 and over	Married	Buddhist	Non-govt. employee	1500	1000 and over	Lower education (below bachelor)	Good	1	Yes	4	4	4	4	16	1	4	1	1	1	1	1	1	1	1	1	1	1	1	12	1	1	4	4	4	3	15	3.75	4	4	4	4	16	4	4
153	North	North	Male	75	70 and over	Divorced	Buddhist	Non-govt. employee	8000	1000 and over	Lower education (below bachelor)	Good	2	Yes	4	4	3	3	14	1	3.5	1	1	1	1	1	1	0	1	1	0	1	1	10	0.833333	1	4	3	3	4	14	3.5	4	4	4	4	16	4	4
154	North	North	Male	64	60-69	Divorced	Buddhist	Non-govt. employee	5000	1000 and over	Lower education (below bachelor)	Good	2	Yes	4	4	3	3	14	1	3.5	1	1	0	1	1	1	0	1	1	1	1	1	10	0.833333	1	4	4	4	4	16	4	4	4	3	3	14	3.5	4
155	North	North	Female	68	60-69	Divorced	Buddhist	Non-govt. employee	3000	1000 and over	Lower education (below bachelor)	Good	2	Yes	4	4	3	3	14	1	3.5	1	1	1	1	1	1	0	1	1	1	1	1	11	0.916667	1	4	3	3	3	13	3.25	4	4	4	4	16	4	4
156	Central	Central	Female	66	60-69	Divorced	Buddhist	Non-govt. employee	6000	1000 and over	Lower education (below bachelor)	Bad	2	Yes	4	4	4	4	16	1	4	1	1	1	1	1	1	1	1	1	1	0	1	11	0.916667	1	4	3	4	4	15	3.75	4	3	3	4	14	3.5	4
157	Central	Central	Male	64	60-69	Divorced	Buddhist	Non-govt. employee	6000	1000 and over	Lower education (below bachelor)	Bad	3	Yes	4	4	4	4	16	1	4	1	1	1	1	1	1	1	1	1	0	1	1	11	0.916667	1	4	3	4	4	15	3.75	3	3	4	3	13	3.25	4
158	Central	Central	Female	67	60-69	Married	Buddhist	Non-govt. employee	6000	1000 and over	Lower education (below bachelor)	Neutral	3	Yes	4	4	4	4	16	1	4	1	1	1	1	1	1	1	1	1	0	1	1	11	0.916667	1	4	4	4	4	16	4	3	3	4	4	14	3.5	4
159	Central	Central	Male	66	60-69	Married	Buddhist	Non-govt. employee	6000	1000 and over	Lower education (below bachelor)	Good	1	Yes	4	4	4	4	16	1	4	1	1	1	1	1	1	1	1	1	0	1	1	11	0.916667	1	4	4	4	4	16	4	4	4	3	3	14	3.5	4
160	Central	Central	Male	65	60-69	Married	Buddhist	Unemployed	600	Less than 1000	Lower education (below bachelor)	Very good	1	Yes	3	4	4	4	15	1	3.75	1	1	1	1	1	1	1	1	1	0	1	1	11	0.916667	1	4	3	4	4	15	3.75	4	4	4	4	16	4	4
161	Central	Central	Female	68	60-69	Divorced	Buddhist	Non-govt. employee	3000	1000 and over	Lower education (below bachelor)	Good	2	Yes	3	4	4	4	15	1	3.75	1	1	1	1	0	1	1	1	1	1	0	1	10	0.833333	1	4	3	4	3	14	3.5	4	4	4	4	16	4	4
162	Central	Central	Female	71	70 and over	Divorced	Buddhist	Non-govt. employee	20000	1000 and over	Lower education (below bachelor)	Good	3	Yes	3	4	4	4	15	1	3.75	1	1	1	1	1	0	1	1	1	1	1	1	11	0.916667	1	3	3	4	4	14	3.5	3	3	3	4	13	3.25	4
163	Central	Central	Female	67	60-69	Married	Buddhist	Non-govt. employee	7000	1000 and over	Lower education (below bachelor)	Neutral	2	Yes	4	4	4	4	16	1	4	1	1	1	1	1	1	1	1	1	0	0	1	10	0.833333	1	3	3	4	4	14	3.5	3	3	4	3	13	3.25	4
164	Central	Central	Female	69	60-69	Married	Buddhist	Unemployed	3000	1000 and over	Lower education (below bachelor)	Good	2	Yes	3	3	3	3	12	0	3	1	1	1	1	0	1	0	1	1	0	1	1	9	0.75	0	4	3	3	4	14	3.5	4	4	4	4	16	4	4
165	Central	Central	Female	60	60-69	Married	Buddhist	Unemployed	3000	1000 and over	Lower education (below bachelor)	Good	1	Yes	3	4	4	4	15	1	3.75	1	1	1	1	1	1	1	1	0	0	1	1	10	0.833333	1	4	4	4	3	15	3.75	3	3	4	4	14	3.5	4
166	Central	Central	Male	66	60-69	Married	Buddhist	Govt. employee	20000	1000 and over	Lower education (below bachelor)	Good	2	Yes	4	4	4	4	16	1	4	1	1	1	1	1	1	1	1	1	1	1	0	11	0.916667	1	3	4	4	4	15	3.75	4	4	4	4	16	4	4
167	Central	Central	Female	60	60-69	Single	Buddhist	Unemployed	4500	1000 and over	Lower education (below bachelor)	Very good	2	Yes	3	3	3	3	12	0	3	1	1	1	0	1	0	1	1	1	1	1	1	10	0.833333	1	3	3	3	3	12	3	4	4	4	4	16	4	4
168	Central	Central	Female	72	70 and over	Married	Buddhist	Non-govt. employee	3000	1000 and over	Lower education (below bachelor)	Good	1	Yes	3	3	3	3	12	0	3	1	0	1	1	1	1	1	1	1	0	1	1	10	0.833333	1	3	3	3	3	12	3	3	4	4	3	14	3.5	4
169	Central	Central	Male	74	70 and over	Married	Buddhist	Unemployed	700	Less than 1000	Lower education (below bachelor)	Good	1	Yes	4	4	4	3	15	1	3.75	1	1	1	1	1	1	1	0	0	1	1	1	10	0.833333	1	4	4	4	3	15	3.75	3	3	4	3	13	3.25	4
170	Central	Central	Male	65	60-69	Single	Buddhist	Unemployed	2500	1000 and over	Uneducated	Very good	1	Yes	3	3	3	3	12	0	3	1	1	1	1	1	1	1	1	1	1	1	1	12	1	1	4	3	4	3	14	3.5	3	3	4	4	14	3.5	4
171	Central	Central	Female	68	60-69	Divorced	Buddhist	Unemployed	3000	1000 and over	Lower education (below bachelor)	Good	2	Yes	4	4	4	3	15	1	3.75	1	1	1	1	1	1	1	1	0	0	1	1	10	0.833333	1	3	3	4	4	14	3.5	2	2	3	3	10	2.5	4
172	Central	Central	Female	65	60-69	Divorced	Buddhist	Unemployed	3000	1000 and over	Uneducated	Good	3	Yes	4	4	4	3	15	1	3.75	1	1	1	1	1	1	1	1	1	1	1	0	11	0.916667	1	3	3	3	3	12	3	3	4	4	3	14	3.5	4
173	Central	Central	Female	64	60-69	Divorced	Buddhist	Unemployed	600	Less than 1000	Uneducated	Good	3	Yes	4	3	3	3	13	0	3.25	1	1	1	1	1	1	1	1	1	0	1	1	11	0.916667	1	4	4	4	3	15	3.75	4	3	3	3	13	3.25	4
174	Central	Central	Female	65	60-69	Divorced	Buddhist	Unemployed	3000	1000 and over	Lower education (below bachelor)	Good	3	Yes	4	4	4	3	15	1	3.75	1	1	1	1	1	1	1	0	0	1	1	1	10	0.833333	1	4	4	4	4	16	4	3	2	2	3	10	2.5	4
175	Central	Central	Male	60	60-69	Married	Buddhist	Non-govt. employee	2500	1000 and over	Lower education (below bachelor)	Good	1	Yes	3	3	2	3	11	0	2.75	1	1	1	1	1	0	1	1	1	0	1	1	10	0.833333	1	4	4	4	3	15	3.75	4	3	3	4	14	3.5	4
176	Central	Central	Female	62	60-69	Married	Buddhist	Non-govt. employee	4000	1000 and over	Lower education (below bachelor)	Good	2	Yes	4	4	4	3	15	1	3.75	1	1	1	1	1	1	1	1	1	0	1	0	10	0.833333	1	4	4	3	3	14	3.5	3	3	4	3	13	3.25	4
177	Central	Central	Female	73	70 and over	Divorced	Buddhist	Unemployed	4000	1000 and over	Uneducated	Good	2	Yes	4	4	4	3	15	1	3.75	1	1	1	1	1	1	0	0	0	1	1	1	9	0.75	0	4	4	3	3	14	3.5	3	4	3	3	13	3.25	4
178	Central	Central	Male	64	60-69	Married	Buddhist	Non-govt. employee	4000	1000 and over	Lower education (below bachelor)	Good	1	Yes	4	4	4	3	15	1	3.75	1	1	1	1	1	1	1	1	1	0	1	1	11	0.916667	1	4	4	3	4	15	3.75	3	3	4	4	14	3.5	4
179	Central	Central	Male	60	60-69	Divorced	Buddhist	Non-govt. employee	3000	1000 and over	Lower education (below bachelor)	Good	1	Yes	3	4	4	4	15	1	3.75	1	1	1	1	1	1	0	1	1	1	1	1	11	0.916667	1	4	4	4	3	15	3.75	4	4	4	4	16	4	4
180	Central	Central	Female	64	60-69	Married	Buddhist	Non-govt. employee	3000	1000 and over	Lower education (below bachelor)	Good	1	Yes	3	4	4	4	15	1	3.75	1	1	1	1	1	1	1	1	1	0	1	0	10	0.833333	1	4	4	3	3	14	3.5	3	2	4	4	13	3.25	4
181	Central	Central	Male	64	60-69	Married	Buddhist	Non-govt. employee	4000	1000 and over	Lower education (below bachelor)	Good	1	Yes	3	3	3	3	12	0	3	1	1	1	1	1	1	1	1	1	1	0	1	11	0.916667	1	4	4	4	3	15	3.75	4	3	3	3	13	3.25	3
182	Central	Central	Female	64	60-69	Married	Buddhist	Non-govt. employee	4500	1000 and over	Lower education (below bachelor)	Neutral	2	Yes	3	4	4	3	14	1	3.5	1	1	1	1	1	1	1	1	1	0	1	1	11	0.916667	1	4	3	4	4	15	3.75	4	4	4	4	16	4	4
183	Central	Central	Female	68	60-69	Married	Buddhist	Non-govt. employee	3000	1000 and over	Lower education (below bachelor)	Neutral	1	Yes	4	3	3	3	13	0	3.25	1	1	1	1	1	1	0	1	1	1	1	1	11	0.916667	1	4	3	3	3	13	3.25	3	2	4	4	13	3.25	3
184	Central	Central	Male	72	70 and over	Married	Buddhist	Non-govt. employee	6000	1000 and over	Lower education (below bachelor)	Very good	1	Yes	4	4	3	4	15	1	3.75	1	1	1	1	1	1	1	1	1	0	1	1	11	0.916667	1	4	3	4	4	15	3.75	3	3	3	3	12	3	4
185	Central	Central	Male	63	60-69	Married	Buddhist	Unemployed	2000	1000 and over	Lower education (below bachelor)	Very good	2	Yes	4	4	3	4	15	1	3.75	1	1	1	1	1	1	1	1	1	1	1	1	12	1	1	4	3	3	3	13	3.25	3	3	3	4	13	3.25	4
186	Central	Central	Female	60	60-69	Divorced	Buddhist	Non-govt. employee	2000	1000 and over	Lower education (below bachelor)	Good	1	Yes	4	3	3	3	13	0	3.25	1	1	1	1	1	0	1	1	1	1	1	1	11	0.916667	1	4	4	3	3	14	3.5	3	3	3	3	12	3	4
187	Central	Central	Male	69	60-69	Married	Buddhist	Unemployed	600	Less than 1000	Lower education (below bachelor)	Good	3	Yes	4	3	3	3	13	0	3.25	1	1	1	1	1	1	1	1	1	1	1	0	11	0.916667	1	3	4	3	3	13	3.25	3	3	4	3	13	3.25	4
188	Central	Central	Male	70	70 and over	Married	Buddhist	Unemployed	700	Less than 1000	Lower education (below bachelor)	Good	3	Yes	3	3	3	3	12	0	3	1	1	1	1	1	1	1	1	1	0	1	1	11	0.916667	1	4	4	3	3	14	3.5	3	3	3	3	12	3	4
189	Central	Central	Male	60	60-69	Married	Buddhist	Non-govt. employee	2000	1000 and over	Lower education (below bachelor)	Good	2	Yes	4	3	3	3	13	0	3.25	1	1	1	1	1	1	1	1	1	1	1	1	12	1	1	4	3	3	3	13	3.25	3	3	4	4	14	3.5	4
190	Central	Central	Female	69	60-69	Married	Buddhist	Non-govt. employee	2000	1000 and over	Lower education (below bachelor)	Good	2	Yes	4	4	3	3	14	1	3.5	1	1	1	1	1	1	1	1	1	0	1	1	11	0.916667	1	4	4	4	3	15	3.75	3	4	4	4	15	3.75	4
191	Central	Central	Female	69	60-69	Married	Buddhist	Non-govt. employee	6000	1000 and over	Lower education (below bachelor)	Neutral	1	Yes	4	4	3	3	14	1	3.5	1	1	1	1	1	1	1	1	1	0	0	0	9	0.75	0	3	4	3	3	13	3.25	2	2	3	3	10	2.5	4
192	Central	Central	Male	65	60-69	Married	Buddhist	Non-govt. employee	6000	1000 and over	Lower education (below bachelor)	Neutral	1	Yes	4	4	3	3	14	1	3.5	1	1	1	1	1	1	1	1	1	1	0	1	11	0.916667	1	4	3	4	3	14	3.5	2	3	4	4	13	3.25	4
193	Central	Central	Female	65	60-69	Married	Buddhist	Non-govt. employee	2000	1000 and over	Lower education (below bachelor)	Neutral	4	Yes	4	4	3	3	14	1	3.5	1	1	1	1	1	1	1	1	1	0	1	1	11	0.916667	1	4	4	4	3	15	3.75	3	3	4	4	14	3.5	4
194	Central	Central	Male	61	60-69	Married	Buddhist	Non-govt. employee	8000	1000 and over	Lower education (below bachelor)	Neutral	1	Yes	4	4	3	3	14	1	3.5	1	1	1	1	1	1	1	1	1	0	1	1	11	0.916667	1	4	3	3	4	14	3.5	3	2	4	4	13	3.25	4
195	Central	Central	Male	75	70 and over	Single	Buddhist	Unemployed	2000	1000 and over	Uneducated	Neutral	1	Yes	3	3	3	3	12	0	3	1	1	1	1	1	0	1	1	1	0	0	0	8	0.666667	0	4	3	3	3	13	3.25	3	3	4	3	13	3.25	4
196	Central	Central	Female	60	60-69	Married	Buddhist	Non-govt. employee	3000	1000 and over	Uneducated	Good	1	Yes	4	4	4	3	15	1	3.75	1	1	1	1	1	0	1	1	1	1	1	1	11	0.916667	1	4	4	4	4	16	4	2	3	4	4	13	3.25	4
197	Central	Central	Female	75	70 and over	Divorced	Buddhist	Non-govt. employee	3000	1000 and over	Uneducated	Neutral	0	No	4	4	3	3	14	1	3.5	1	1	1	1	1	1	1	1	1	0	1	1	11	0.916667	1	4	3	4	3	14	3.5	4	3	3	3	13	3.25	4
198	Central	Central	Female	65	60-69	Divorced	Buddhist	Non-govt. employee	4000	1000 and over	Lower education (below bachelor)	Neutral	0	No	4	4	3	3	14	1	3.5	1	1	1	1	1	1	1	1	1	1	1	0	11	0.916667	1	4	3	4	3	14	3.5	4	4	4	4	16	4	4
199	Central	Central	Female	75	70 and over	Married	Buddhist	Unemployed	3000	1000 and over	Lower education (below bachelor)	Good	2	Yes	4	3	3	3	13	0	3.25	1	1	1	1	1	1	1	1	1	1	1	0	11	0.916667	1	3	3	4	4	14	3.5	4	4	3	3	14	3.5	4
200	Central	Central	Female	64	60-69	Divorced	Buddhist	Non-govt. employee	6000	1000 and over	Lower education (below bachelor)	Neutral	0	No	4	4	3	3	14	1	3.5	1	1	1	1	1	1	1	1	1	0	1	1	11	0.916667	1	4	3	4	3	14	3.5	4	4	3	3	14	3.5	4
201	Central	Central	Female	75	70 and over	Divorced	Buddhist	Unemployed	2000	1000 and over	Uneducated	Very good	5	Yes	4	4	3	4	15	1	3.75	1	1	1	1	1	1	1	1	1	0	1	1	11	0.916667	1	4	4	4	4	16	4	4	4	4	4	16	4	4
202	Central	Central	Female	74	70 and over	Divorced	Buddhist	Unemployed	1500	1000 and over	Lower education (below bachelor)	Very good	4	Yes	3	3	3	4	13	0	3.25	1	1	1	1	1	1	1	1	1	1	0	1	11	0.916667	1	4	4	4	4	16	4	4	4	4	4	16	4	4
203	Central	Central	Male	75	70 and over	Married	Buddhist	Non-govt. employee	3000	1000 and over	Lower education (below bachelor)	Bad	1	Yes	4	4	4	4	16	1	4	1	1	1	1	1	1	1	1	1	0	1	1	11	0.916667	1	4	3	3	4	14	3.5	4	4	4	4	16	4	4
204	Central	Central	Female	75	70 and over	Married	Buddhist	Non-govt. employee	5000	1000 and over	Lower education (below bachelor)	Neutral	2	Yes	3	3	3	3	12	0	3	1	1	1	1	0	1	1	1	1	1	1	1	11	0.916667	1	4	4	4	3	15	3.75	4	4	4	4	16	4	4
205	Central	Central	Male	74	70 and over	Divorced	Buddhist	Non-govt. employee	4000	1000 and over	Lower education (below bachelor)	Neutral	2	Yes	3	3	3	3	12	0	3	1	1	1	1	1	1	1	1	1	0	1	1	11	0.916667	1	2	2	2	2	8	2	4	4	4	4	16	4	4
206	Central	Central	Male	75	70 and over	Divorced	Buddhist	Non-govt. employee	2000	1000 and over	Uneducated	Neutral	0	No	3	3	3	4	13	0	3.25	1	1	1	1	1	1	1	1	1	1	1	0	11	0.916667	1	4	4	4	4	16	4	2	2	3	3	10	2.5	4
207	Central	Central	Female	74	70 and over	Divorced	Buddhist	Non-govt. employee	4000	1000 and over	Lower education (below bachelor)	Neutral	1	Yes	4	4	3	4	15	1	3.75	1	1	1	1	1	1	1	1	1	1	1	1	12	1	1	4	4	4	4	16	4	4	3	3	4	14	3.5	4
208	Central	Central	Female	73	70 and over	Divorced	Buddhist	Non-govt. employee	3000	1000 and over	Lower education (below bachelor)	Neutral	4	Yes	4	4	3	4	15	1	3.75	1	1	1	1	1	1	1	1	1	1	1	0	11	0.916667	1	4	4	4	3	15	3.75	3	3	3	4	13	3.25	4
209	Central	Central	Female	73	70 and over	Divorced	Buddhist	Unemployed	1500	1000 and over	Lower education (below bachelor)	Good	1	Yes	4	3	3	3	13	0	3.25	1	1	1	1	1	1	1	1	1	0	1	1	11	0.916667	1	4	3	4	4	15	3.75	4	2	4	4	14	3.5	4
210	Central	Central	Male	68	60-69	Married	Buddhist	Unemployed	3000	1000 and over	Lower education (below bachelor)	Good	2	Yes	3	3	3	3	12	0	3	1	1	1	1	1	0	1	1	1	0	1	1	10	0.833333	1	3	3	3	4	13	3.25	3	4	4	3	14	3.5	4
211	Central	Central	Female	63	60-69	Married	Buddhist	Non-govt. employee	5000	1000 and over	Lower education (below bachelor)	Good	3	Yes	3	3	3	3	12	0	3	1	1	1	1	1	0	1	1	1	1	1	1	11	0.916667	1	3	4	3	3	13	3.25	3	3	4	4	14	3.5	4
212	Central	Central	Male	63	60-69	Married	Buddhist	Non-govt. employee	6000	1000 and over	Lower education (below bachelor)	Neutral	1	Yes	3	3	3	3	12	0	3	1	1	1	1	1	1	1	1	1	0	0	1	10	0.833333	1	4	3	4	3	14	3.5	4	3	3	4	14	3.5	4
213	Central	Central	Female	65	60-69	Married	Buddhist	Non-govt. employee	5000	1000 and over	Lower education (below bachelor)	Neutral	1	Yes	2	4	3	3	12	0	3	1	1	1	1	1	1	1	1	1	0	0	1	10	0.833333	1	3	4	3	3	13	3.25	3	4	4	3	14	3.5	4
214	Central	Central	Male	63	60-69	Married	Buddhist	Non-govt. employee	10000	1000 and over	Lower education (below bachelor)	Neutral	2	Yes	2	3	3	4	12	0	3	1	1	1	1	1	1	1	1	1	0	0	0	9	0.75	0	4	3	3	3	13	3.25	4	3	3	4	14	3.5	4
215	Central	Central	Female	63	60-69	Married	Buddhist	Non-govt. employee	3000	1000 and over	Uneducated	Neutral	0	No	3	3	3	3	12	0	3	1	1	0	1	1	1	1	0	1	1	1	1	10	0.833333	1	3	3	3	4	13	3.25	3	3	3	3	12	3	4
216	Central	Central	Female	64	60-69	Divorced	Buddhist	Non-govt. employee	3000	1000 and over	Uneducated	Neutral	0	No	4	3	3	3	13	0	3.25	1	1	1	1	1	1	1	1	1	0	0	1	10	0.833333	1	3	4	3	4	14	3.5	3	4	4	3	14	3.5	4
217	Central	Central	Male	62	60-69	Married	Buddhist	Non-govt. employee	4500	1000 and over	Lower education (below bachelor)	Neutral	1	Yes	3	3	3	3	12	0	3	1	1	1	1	1	0	1	1	1	1	1	1	11	0.916667	1	4	3	3	3	13	3.25	3	2	4	4	13	3.25	4
218	Central	Central	Male	68	60-69	Married	Buddhist	Non-govt. employee	6000	1000 and over	Lower education (below bachelor)	Neutral	1	Yes	3	3	3	3	12	0	3	1	1	1	1	1	1	1	1	1	1	0	0	10	0.833333	1	3	3	3	3	12	3	2	2	2	2	8	2	3
219	Central	Central	Male	64	60-69	Married	Buddhist	Non-govt. employee	6000	1000 and over	Lower education (below bachelor)	Neutral	0	No	3	3	3	3	12	0	3	1	1	1	1	1	0	1	1	1	1	0	0	9	0.75	0	4	4	3	4	15	3.75	1	1	1	1	4	1	4
220	Central	Central	Male	65	60-69	Married	Buddhist	Non-govt. employee	8000	1000 and over	Lower education (below bachelor)	Neutral	0	No	3	3	3	3	12	0	3	1	1	1	1	1	1	1	1	1	0	1	1	11	0.916667	1	4	3	4	4	15	3.75	4	4	4	4	16	4	4
221	Central	Central	Female	65	60-69	Single	Buddhist	Non-govt. employee	5000	1000 and over	Lower education (below bachelor)	Neutral	0	No	3	3	3	3	12	0	3	1	1	1	1	1	1	1	1	1	1	0	1	11	0.916667	1	4	4	4	4	16	4	3	2	4	4	13	3.25	4
222	Central	Central	Female	66	60-69	Divorced	Buddhist	Non-govt. employee	2000	1000 and over	Lower education (below bachelor)	Good	2	Yes	2	4	4	4	14	1	3.5	1	1	1	1	1	1	1	1	1	0	1	1	11	0.916667	1	4	4	4	4	16	4	3	3	4	4	14	3.5	4
223	Central	Central	Male	67	60-69	Single	Buddhist	Non-govt. employee	10000	1000 and over	Lower education (below bachelor)	Neutral	0	No	3	3	3	3	12	0	3	1	1	1	1	1	1	1	1	1	0	1	1	11	0.916667	1	4	3	4	3	14	3.5	3	3	3	4	13	3.25	4
224	Central	Central	Male	67	60-69	Married	Buddhist	Non-govt. employee	10000	1000 and over	Lower education (below bachelor)	Neutral	2	Yes	4	4	3	4	15	1	3.75	1	1	1	1	0	0	1	1	1	1	1	1	10	0.833333	1	3	4	4	4	15	3.75	4	3	3	3	13	3.25	4
225	Central	Central	Female	65	60-69	Married	Buddhist	Non-govt. employee	3000	1000 and over	Lower education (below bachelor)	Good	2	Yes	4	4	4	4	16	1	4	1	1	1	1	1	1	1	1	1	0	1	1	11	0.916667	1	4	4	4	3	15	3.75	3	4	3	3	13	3.25	4
226	Central	Central	Female	61	60-69	Divorced	Buddhist	Non-govt. employee	3000	1000 and over	Lower education (below bachelor)	Neutral	1	Yes	4	4	4	4	16	1	4	1	0	1	1	0	1	1	1	1	1	1	1	10	0.833333	1	4	4	4	4	16	4	3	3	4	4	14	3.5	4
227	Central	Central	Female	62	60-69	Married	Buddhist	Non-govt. employee	3000	1000 and over	Lower education (below bachelor)	Good	0	No	4	3	4	4	15	1	3.75	1	1	1	1	0	1	1	1	1	0	1	1	10	0.833333	1	3	3	4	4	14	3.5	4	4	3	3	14	3.5	4
228	Central	Central	Female	73	70 and over	Married	Buddhist	Unemployed	700	Less than 1000	Uneducated	Good	1	Yes	4	3	4	4	15	1	3.75	1	0	1	1	1	1	1	1	1	1	1	0	10	0.833333	1	3	4	4	3	14	3.5	4	4	4	4	16	4	4
229	Central	Central	Male	70	70 and over	Married	Buddhist	Non-govt. employee	1500	1000 and over	Lower education (below bachelor)	Very good	1	Yes	4	3	3	3	13	0	3.25	1	1	1	1	1	1	1	1	1	0	1	1	11	0.916667	1	4	4	4	3	15	3.75	4	4	4	4	16	4	4
230	Central	Central	Female	71	70 and over	Divorced	Buddhist	Non-govt. employee	2500	1000 and over	Uneducated	Very good	1	Yes	4	3	4	4	15	1	3.75	1	1	1	1	1	0	1	1	1	1	0	1	10	0.833333	1	4	4	4	4	16	4	4	4	4	4	16	4	4
231	Central	Central	Male	63	60-69	Married	Buddhist	Non-govt. employee	2500	1000 and over	Lower education (below bachelor)	Very good	2	Yes	4	3	3	3	13	0	3.25	1	1	1	1	1	1	1	1	1	0	1	1	11	0.916667	1	4	4	3	3	14	3.5	4	4	4	4	16	4	4
232	Central	Central	Female	71	70 and over	Married	Buddhist	Non-govt. employee	3000	1000 and over	Lower education (below bachelor)	Good	1	Yes	4	3	3	4	14	1	3.5	1	1	1	0	1	1	1	1	1	1	0	1	10	0.833333	1	4	4	4	3	15	3.75	4	4	4	4	16	4	4
233	Central	Central	Male	61	60-69	Married	Buddhist	Non-govt. employee	3000	1000 and over	Lower education (below bachelor)	Neutral	0	No	4	4	3	3	14	1	3.5	1	1	1	1	1	1	0	1	1	1	1	0	10	0.833333	1	3	4	4	4	15	3.75	4	4	3	4	15	3.75	3
234	Central	Central	Female	65	60-69	Married	Buddhist	Non-govt. employee	3000	1000 and over	Lower education (below bachelor)	Good	1	Yes	4	4	3	3	14	1	3.5	1	1	1	1	1	1	0	1	1	0	1	1	10	0.833333	1	4	4	4	4	16	4	4	3	3	4	14	3.5	4
235	Central	Central	Male	67	60-69	Married	Buddhist	Non-govt. employee	5000	1000 and over	Lower education (below bachelor)	Neutral	0	No	3	4	3	3	13	0	3.25	1	1	1	1	1	1	1	1	1	0	0	1	10	0.833333	1	3	4	4	4	15	3.75	4	4	3	3	14	3.5	4
236	Central	Central	Male	70	70 and over	Married	Buddhist	Non-govt. employee	3000	1000 and over	Lower education (below bachelor)	Good	1	Yes	3	4	3	4	14	1	3.5	1	1	1	1	1	1	0	1	1	0	1	1	10	0.833333	1	4	4	4	4	16	4	4	4	4	4	16	4	4
237	Central	Central	Male	69	60-69	Married	Buddhist	Non-govt. employee	4000	1000 and over	Lower education (below bachelor)	Good	0	No	3	3	3	3	12	0	3	1	1	1	0	1	1	1	1	1	1	1	1	11	0.916667	1	4	4	4	3	15	3.75	4	4	3	3	14	3.5	3
238	Central	Central	Female	70	70 and over	Married	Buddhist	Non-govt. employee	3000	1000 and over	Lower education (below bachelor)	Good	1	Yes	3	3	3	3	12	0	3	1	1	1	1	1	1	0	1	1	0	1	1	10	0.833333	1	3	3	3	4	13	3.25	3	4	4	4	15	3.75	3
239	Central	Central	Male	63	60-69	Married	Buddhist	Non-govt. employee	2000	1000 and over	Lower education (below bachelor)	Very good	3	Yes	3	3	3	4	13	0	3.25	1	1	1	1	1	1	1	1	1	0	1	1	11	0.916667	1	3	3	3	3	12	3	3	3	4	4	14	3.5	4
240	Central	Central	Female	65	60-69	Divorced	Buddhist	Non-govt. employee	4500	1000 and over	Lower education (below bachelor)	Good	1	Yes	3	3	3	3	12	0	3	1	1	1	1	1	1	0	0	1	1	1	1	10	0.833333	1	3	4	3	3	13	3.25	3	4	4	4	15	3.75	4
241	Central	Central	Female	60	60-69	Married	Buddhist	Non-govt. employee	5000	1000 and over	Lower education (below bachelor)	Good	1	Yes	4	3	3	3	13	0	3.25	1	1	1	1	1	1	1	1	1	0	1	1	11	0.916667	1	4	3	3	4	14	3.5	3	4	3	4	14	3.5	4
242	Central	Central	Female	60	60-69	Married	Buddhist	Non-govt. employee	3500	1000 and over	Lower education (below bachelor)	Neutral	2	Yes	4	3	3	4	14	1	3.5	1	1	1	1	1	1	1	1	1	0	1	1	11	0.916667	1	4	3	3	3	13	3.25	3	3	4	4	14	3.5	3
243	Central	Central	Male	63	60-69	Married	Buddhist	Non-govt. employee	5000	1000 and over	Lower education (below bachelor)	Neutral	1	Yes	4	3	3	4	14	1	3.5	1	1	1	0	1	1	1	1	1	0	1	1	10	0.833333	1	3	3	3	4	13	3.25	4	4	4	4	16	4	4
244	Central	Central	Female	65	60-69	Divorced	Buddhist	Non-govt. employee	2500	1000 and over	Lower education (below bachelor)	Good	1	Yes	4	3	3	3	13	0	3.25	1	1	1	1	1	1	0	1	1	0	1	1	10	0.833333	1	4	4	3	3	14	3.5	4	3	4	4	15	3.75	3
245	Central	Central	Female	70	70 and over	Married	Buddhist	Non-govt. employee	3000	1000 and over	Lower education (below bachelor)	Good	2	Yes	4	3	3	3	13	0	3.25	1	1	1	1	1	1	1	1	1	0	1	1	11	0.916667	1	3	3	3	3	12	3	4	3	3	4	14	3.5	4
246	Central	Central	Male	60	60-69	Married	Buddhist	Non-govt. employee	4000	1000 and over	Lower education (below bachelor)	Good	1	Yes	4	4	4	4	16	1	4	1	1	1	1	1	1	1	1	1	0	1	1	11	0.916667	1	3	3	3	3	12	3	4	4	4	4	16	4	4
247	Central	Central	Male	66	60-69	Married	Buddhist	Non-govt. employee	6000	1000 and over	Lower education (below bachelor)	Good	0	No	4	4	4	4	16	1	4	1	1	1	1	1	1	1	1	1	0	1	1	11	0.916667	1	3	3	3	3	12	3	4	4	4	4	16	4	4
248	Central	Central	Female	60	60-69	Divorced	Buddhist	Non-govt. employee	8000	1000 and over	Lower education (below bachelor)	Neutral	0	No	4	3	3	4	14	1	3.5	1	1	1	1	1	1	1	1	1	0	1	1	11	0.916667	1	4	4	4	4	16	4	4	4	4	4	16	4	3
249	Central	Central	Male	63	60-69	Married	Buddhist	Non-govt. employee	3000	1000 and over	Lower education (below bachelor)	Neutral	0	No	4	4	4	3	15	1	3.75	1	1	1	1	1	1	0	0	1	0	1	1	9	0.75	0	4	3	3	4	14	3.5	4	3	4	4	15	3.75	4
250	Central	Central	Female	70	70 and over	Married	Buddhist	Non-govt. employee	2500	1000 and over	Lower education (below bachelor)	Neutral	0	No	4	4	3	4	15	1	3.75	1	1	1	0	1	1	1	1	1	0	1	1	10	0.833333	1	4	4	4	4	16	4	4	4	4	4	16	4	4
251	Central	Central	Female	62	60-69	Married	Buddhist	Non-govt. employee	1500	1000 and over	Lower education (below bachelor)	Neutral	0	No	4	4	3	3	14	1	3.5	1	1	1	0	1	1	0	1	1	0	1	1	9	0.75	0	4	3	4	4	15	3.75	4	4	4	4	16	4	3
252	Central	Central	Female	69	60-69	Married	Buddhist	Non-govt. employee	3000	1000 and over	Lower education (below bachelor)	Very good	1	Yes	4	4	3	3	14	1	3.5	1	1	1	1	1	1	0	0	1	0	1	1	9	0.75	0	4	4	4	4	16	4	3	4	4	4	15	3.75	4
253	Central	Central	Male	74	70 and over	Married	Buddhist	Non-govt. employee	3000	1000 and over	Lower education (below bachelor)	Very good	3	Yes	4	4	3	3	14	1	3.5	1	0	1	1	1	1	0	0	1	0	1	1	8	0.666667	0	4	4	4	4	16	4	4	3	4	4	15	3.75	4
254	Central	Central	Female	66	60-69	Divorced	Buddhist	Non-govt. employee	3000	1000 and over	Lower education (below bachelor)	Neutral	0	No	4	4	3	3	14	1	3.5	1	1	1	1	1	1	1	1	1	0	1	1	11	0.916667	1	4	3	3	3	13	3.25	3	3	4	4	14	3.5	4
255	Central	Central	Female	66	60-69	Married	Buddhist	Non-govt. employee	1500	1000 and over	Uneducated	Very good	4	Yes	3	3	3	3	12	0	3	1	1	1	1	1	1	1	1	1	0	1	1	11	0.916667	1	3	4	3	4	14	3.5	3	4	4	4	15	3.75	3
256	Central	Central	Female	74	70 and over	Divorced	Buddhist	Non-govt. employee	3000	1000 and over	Lower education (below bachelor)	Neutral	0	No	3	3	3	3	12	0	3	1	1	1	0	1	0	1	1	1	0	1	0	8	0.666667	0	3	4	4	4	15	3.75	4	4	4	4	16	4	3
257	Central	Central	Male	64	60-69	Married	Buddhist	Non-govt. employee	5000	1000 and over	Lower education (below bachelor)	Bad	2	Yes	4	4	3	3	14	1	3.5	1	1	0	1	1	1	1	1	1	1	1	1	11	0.916667	1	4	4	4	4	16	4	3	3	3	4	13	3.25	4
258	Central	Central	Female	61	60-69	Married	Buddhist	Unemployed	600	Less than 1000	Lower education (below bachelor)	Very good	5	Yes	4	4	3	3	14	1	3.5	1	1	1	1	1	1	1	1	1	1	1	1	12	1	1	4	4	4	4	16	4	3	3	3	3	12	3	4
259	Central	Central	Female	66	60-69	Married	Buddhist	Non-govt. employee	5000	1000 and over	Lower education (below bachelor)	Neutral	1	Yes	3	3	3	3	12	0	3	1	1	1	1	1	0	1	0	1	1	1	1	10	0.833333	1	4	4	4	3	15	3.75	4	4	4	4	16	4	4
260	Central	Central	Female	66	60-69	Married	Christian	Non-govt. employee	1200	1000 and over	Lower education (below bachelor)	Good	2	Yes	3	3	3	4	13	0	3.25	1	1	1	0	1	1	1	0	1	1	1	1	10	0.833333	1	4	4	4	4	16	4	4	4	4	4	16	4	4
261	Central	Central	Male	65	60-69	Married	Buddhist	Non-govt. employee	1500	1000 and over	Lower education (below bachelor)	Good	2	Yes	3	3	3	3	12	0	3	1	1	1	1	1	0	1	1	1	0	1	1	10	0.833333	1	4	3	4	4	15	3.75	4	4	4	4	16	4	4
262	Central	Central	Female	68	60-69	Married	Buddhist	Non-govt. employee	1000	1000 and over	Lower education (below bachelor)	Good	0	No	4	4	4	3	15	1	3.75	1	1	1	1	1	1	1	1	1	1	0	1	11	0.916667	1	3	4	4	4	15	3.75	4	4	4	4	16	4	4
263	Central	Central	Male	60	60-69	Married	Buddhist	Non-govt. employee	6000	1000 and over	Lower education (below bachelor)	Good	3	Yes	3	3	3	3	12	0	3	0	1	1	1	1	1	1	1	1	1	1	1	11	0.916667	1	4	3	4	3	14	3.5	4	4	4	4	16	4	3
264	Central	Central	Female	69	60-69	Married	Buddhist	Non-govt. employee	7000	1000 and over	Lower education (below bachelor)	Good	2	Yes	3	3	3	3	12	0	3	0	1	1	1	1	1	1	1	1	0	1	1	10	0.833333	1	4	3	4	3	14	3.5	4	4	4	4	16	4	3
265	Central	Central	Female	70	70 and over	Married	Buddhist	Non-govt. employee	6000	1000 and over	Lower education (below bachelor)	Good	4	Yes	4	4	4	3	15	1	3.75	1	1	1	0	1	1	1	0	1	0	1	1	9	0.75	0	4	3	3	3	13	3.25	4	4	4	4	16	4	4
266	Central	Central	Male	75	70 and over	Married	Buddhist	Non-govt. employee	1500	1000 and over	Lower education (below bachelor)	Good	2	Yes	3	3	4	3	13	0	3.25	1	1	1	1	1	1	0	0	0	0	1	1	8	0.666667	0	3	4	3	4	14	3.5	4	4	3	4	15	3.75	4
267	Central	Central	Male	75	70 and over	Married	Buddhist	Unemployed	700	Less than 1000	Lower education (below bachelor)	Good	1	Yes	3	3	3	3	12	0	3	1	1	1	1	1	1	1	1	1	1	1	1	12	1	1	4	3	4	4	15	3.75	4	4	3	3	14	3.5	4
268	Central	Central	Female	60	60-69	Married	Buddhist	Unemployed	600	Less than 1000	Lower education (below bachelor)	Neutral	2	Yes	4	3	3	3	13	0	3.25	1	1	1	1	0	0	0	1	1	0	1	1	8	0.666667	0	4	3	4	3	14	3.5	3	3	3	3	12	3	4
269	Central	Central	Male	67	60-69	Married	Buddhist	Govt. employee	30000	1000 and over	Bachelor	Neutral	3	Yes	4	4	4	4	16	1	4	1	1	1	1	1	0	1	1	1	1	1	1	11	0.916667	1	4	4	3	3	14	3.5	3	3	3	3	12	3	4
270	Central	Central	Female	63	60-69	Married	Buddhist	Non-govt. employee	3000	1000 and over	Lower education (below bachelor)	Neutral	2	Yes	4	4	4	4	16	1	4	1	1	0	1	1	1	1	1	0	0	1	1	9	0.75	0	4	4	4	4	16	4	3	3	4	3	13	3.25	4
271	Central	Central	Male	66	60-69	Married	Buddhist	Non-govt. employee	5000	1000 and over	Lower education (below bachelor)	Neutral	3	Yes	3	3	3	3	12	0	3	1	1	1	0	1	1	1	1	1	0	1	1	10	0.833333	1	4	4	4	4	16	4	4	3	4	3	14	3.5	4
272	Central	Central	Female	63	60-69	Married	Buddhist	Non-govt. employee	5000	1000 and over	Lower education (below bachelor)	Neutral	4	Yes	3	3	3	3	12	0	3	1	1	1	1	1	1	1	1	1	0	1	1	11	0.916667	1	4	4	4	4	16	4	3	3	4	4	14	3.5	3
273	Central	Central	Female	62	60-69	Divorced	Buddhist	Govt. employee	18000	1000 and over	Higher education (above bachelor)	Neutral	2	Yes	3	3	2	3	11	0	2.75	1	1	1	1	1	0	1	1	1	1	1	1	11	0.916667	1	4	4	4	4	16	4	4	3	3	4	14	3.5	4
274	Central	Central	Male	64	60-69	Married	Buddhist	Non-govt. employee	10000	1000 and over	Lower education (below bachelor)	Neutral	2	Yes	4	4	3	3	14	1	3.5	1	1	1	1	1	1	1	1	0	1	0	1	10	0.833333	1	4	4	4	4	16	4	3	3	3	3	12	3	3
275	Central	Central	Female	64	60-69	Married	Buddhist	Non-govt. employee	6000	1000 and over	Lower education (below bachelor)	Neutral	2	Yes	4	4	4	3	15	1	3.75	1	1	1	1	1	0	1	1	1	1	1	1	11	0.916667	1	4	4	4	3	15	3.75	3	3	3	3	12	3	4
276	Central	Central	Female	67	60-69	Divorced	Buddhist	Non-govt. employee	5000	1000 and over	Uneducated	Good	2	Yes	3	4	4	3	14	1	3.5	1	1	1	1	1	0	1	1	1	0	0	0	8	0.666667	0	4	4	4	4	16	4	3	3	3	3	12	3	4
277	Central	Central	Female	64	60-69	Divorced	Buddhist	Non-govt. employee	6000	1000 and over	Lower education (below bachelor)	Neutral	0	No	3	3	3	3	12	0	3	1	1	1	1	1	1	1	0	1	0	1	1	10	0.833333	1	4	4	4	4	16	4	4	4	4	4	16	4	3
278	Central	Central	Female	64	60-69	Married	Buddhist	Non-govt. employee	3000	1000 and over	Lower education (below bachelor)	Good	1	Yes	3	3	3	3	12	0	3	1	1	1	0	0	1	1	1	1	0	1	1	9	0.75	0	4	4	3	3	14	3.5	2	4	4	4	14	3.5	3
279	Central	Central	Male	67	60-69	Married	Buddhist	Non-govt. employee	3000	1000 and over	Lower education (below bachelor)	Good	2	Yes	3	3	3	3	12	0	3	1	1	1	1	1	1	0	1	1	0	1	1	10	0.833333	1	4	4	4	4	16	4	4	3	3	4	14	3.5	4
280	Central	Central	Female	62	60-69	Married	Buddhist	Unemployed	600	Less than 1000	Lower education (below bachelor)	Good	4	Yes	3	4	3	3	13	0	3.25	1	1	1	1	1	1	1	0	1	0	1	1	10	0.833333	1	4	4	4	4	16	4	3	3	4	4	14	3.5	4
281	Central	Central	Female	75	70 and over	Divorced	Buddhist	Unemployed	700	Less than 1000	Uneducated	Good	1	Yes	3	3	3	3	12	0	3	1	1	1	1	1	1	1	1	1	0	1	1	11	0.916667	1	4	4	4	3	15	3.75	3	3	4	4	14	3.5	4
282	Central	Central	Male	63	60-69	Married	Buddhist	Non-govt. employee	3000	1000 and over	Lower education (below bachelor)	Good	0	No	4	4	3	3	14	1	3.5	1	1	1	1	1	1	1	1	1	1	0	1	11	0.916667	1	4	4	4	4	16	4	3	3	3	4	13	3.25	3
283	Central	Central	Female	66	60-69	Married	Buddhist	Non-govt. employee	6000	1000 and over	Lower education (below bachelor)	Very good	4	Yes	3	4	3	3	13	0	3.25	1	1	1	1	1	1	1	1	1	0	1	1	11	0.916667	1	4	4	4	4	16	4	3	3	3	3	12	3	4
284	Central	Central	Male	75	70 and over	Married	Buddhist	Non-govt. employee	5500	1000 and over	Uneducated	Very good	4	Yes	3	4	4	3	14	1	3.5	0	1	1	1	1	1	1	1	1	1	0	1	10	0.833333	1	4	3	4	4	15	3.75	3	3	3	3	12	3	3
285	Central	Central	Female	74	70 and over	Divorced	Buddhist	Non-govt. employee	3500	1000 and over	Uneducated	Good	3	Yes	3	4	4	4	15	1	3.75	1	1	1	1	1	1	1	1	1	0	1	1	11	0.916667	1	3	4	4	4	15	3.75	4	3	3	3	13	3.25	4
286	Central	Central	Male	63	60-69	Married	Buddhist	Govt. employee	15000	1000 and over	Lower education (below bachelor)	Neutral	0	No	3	3	4	3	13	0	3.25	1	1	0	1	0	1	1	1	1	0	1	1	9	0.75	0	4	4	4	3	15	3.75	3	4	3	3	13	3.25	4
287	Central	Central	Female	68	60-69	Divorced	Buddhist	Govt. employee	22000	1000 and over	Bachelor	Neutral	0	No	3	4	4	4	15	1	3.75	1	1	1	1	1	1	1	1	1	1	1	1	12	1	1	4	4	4	4	16	4	3	3	4	4	14	3.5	4
288	Central	Central	Female	63	60-69	Married	Buddhist	Non-govt. employee	5000	1000 and over	Lower education (below bachelor)	Neutral	0	No	3	3	3	3	12	0	3	1	1	1	1	1	1	1	1	1	0	1	1	11	0.916667	1	3	4	3	4	14	3.5	3	3	3	3	12	3	4
289	Central	Central	Male	69	60-69	Married	Buddhist	Non-govt. employee	7000	1000 and over	Lower education (below bachelor)	Good	1	Yes	3	4	3	3	13	0	3.25	1	1	1	1	1	1	1	1	1	0	1	1	11	0.916667	1	4	4	4	4	16	4	3	4	3	3	13	3.25	4
290	Central	Central	Male	65	60-69	Married	Buddhist	Non-govt. employee	8000	1000 and over	Lower education (below bachelor)	Neutral	0	No	3	4	3	3	13	0	3.25	1	1	1	1	1	0	1	1	1	0	1	1	10	0.833333	1	3	3	4	4	14	3.5	3	4	3	4	14	3.5	3
291	Central	Central	Female	61	60-69	Divorced	Buddhist	Non-govt. employee	5000	1000 and over	Lower education (below bachelor)	Good	2	Yes	3	4	4	3	14	1	3.5	1	1	1	1	1	1	1	1	1	0	1	1	11	0.916667	1	4	4	4	4	16	4	4	4	3	4	15	3.75	4
292	Central	Central	Female	64	60-69	Single	Buddhist	Unemployed	600	Less than 1000	Lower education (below bachelor)	Neutral	3	Yes	3	4	3	3	13	0	3.25	1	1	1	1	1	1	0	1	1	1	1	1	11	0.916667	1	4	4	3	3	14	3.5	4	4	4	4	16	4	4
293	Central	Central	Female	62	60-69	Single	Buddhist	Unemployed	600	Less than 1000	Lower education (below bachelor)	Good	1	Yes	3	3	3	3	12	0	3	1	1	1	1	1	1	1	1	1	1	0	1	11	0.916667	1	4	4	3	3	14	3.5	4	4	4	3	15	3.75	3
294	Central	Central	Female	70	70 and over	Divorced	Buddhist	Non-govt. employee	2500	1000 and over	Lower education (below bachelor)	Neutral	2	Yes	3	3	3	4	13	0	3.25	1	1	1	1	1	1	1	1	1	0	1	1	11	0.916667	1	3	3	4	4	14	3.5	4	3	4	4	15	3.75	4
295	Central	Central	Male	62	60-69	Married	Buddhist	Govt. employee	18000	1000 and over	Lower education (below bachelor)	Neutral	0	No	4	4	3	3	14	1	3.5	1	1	1	1	1	1	1	1	1	0	1	1	11	0.916667	1	4	3	4	3	14	3.5	4	4	4	4	16	4	3
296	Central	Central	Male	64	60-69	Married	Buddhist	Non-govt. employee	5000	1000 and over	Lower education (below bachelor)	Bad	0	No	4	4	3	3	14	1	3.5	1	1	1	1	1	1	1	1	1	1	1	1	12	1	1	3	4	4	4	15	3.75	4	4	4	4	16	4	4
297	Central	Central	Female	66	60-69	Single	Buddhist	Non-govt. employee	30000	1000 and over	Lower education (below bachelor)	Neutral	1	Yes	4	4	4	3	15	1	3.75	1	1	1	1	1	0	1	1	1	1	1	1	11	0.916667	1	4	4	4	4	16	4	4	4	4	4	16	4	4
298	Central	Central	Male	60	60-69	Divorced	Buddhist	Non-govt. employee	15000	1000 and over	Lower education (below bachelor)	Neutral	0	No	4	4	4	4	16	1	4	1	1	1	1	1	1	1	1	1	1	0	1	11	0.916667	1	4	4	4	3	15	3.75	3	3	4	4	14	3.5	4
299	Central	Central	Male	62	60-69	Married	Buddhist	Non-govt. employee	18000	1000 and over	Lower education (below bachelor)	Neutral	0	No	4	4	3	3	14	1	3.5	1	1	1	1	1	0	1	1	1	1	1	1	11	0.916667	1	4	3	4	4	15	3.75	3	3	3	4	13	3.25	3
300	Central	Central	Female	63	60-69	Married	Buddhist	Non-govt. employee	1000	1000 and over	Lower education (below bachelor)	Neutral	0	No	4	4	4	3	15	1	3.75	1	1	1	1	1	1	1	1	1	0	1	1	11	0.916667	1	4	4	4	3	15	3.75	3	3	4	4	14	3.5	4
301	Central	Central	Female	64	60-69	Single	Buddhist	Unemployed	600	Less than 1000	Lower education (below bachelor)	Good	2	Yes	3	4	3	3	13	0	3.25	1	1	1	0	1	1	0	1	1	0	1	1	9	0.75	0	4	3	4	3	14	3.5	3	4	3	4	14	3.5	4
302	Central	Central	Female	68	60-69	Married	Buddhist	Non-govt. employee	12000	1000 and over	Lower education (below bachelor)	Good	2	Yes	3	4	3	3	13	0	3.25	1	1	1	1	1	1	1	1	1	0	1	1	11	0.916667	1	4	4	4	4	16	4	4	3	4	4	15	3.75	4
303	Central	Central	Female	61	60-69	Married	Buddhist	Non-govt. employee	1000	1000 and over	Lower education (below bachelor)	Neutral	0	No	3	4	3	3	13	0	3.25	1	1	1	1	1	1	1	1	1	0	1	1	11	0.916667	1	4	4	3	3	14	3.5	4	4	4	4	16	4	3
304	Central	Central	Female	75	70 and over	Divorced	Buddhist	Unemployed	1000	1000 and over	Lower education (below bachelor)	Good	3	Yes	3	3	3	3	12	0	3	1	1	1	0	1	0	0	1	1	0	1	1	8	0.666667	0	4	3	4	4	15	3.75	4	3	4	4	15	3.75	4
305	Central	Central	Female	66	60-69	Divorced	Buddhist	Govt. employee	18000	1000 and over	Lower education (below bachelor)	Good	0	No	3	4	3	3	13	0	3.25	1	1	1	1	1	1	1	1	1	0	1	1	11	0.916667	1	4	3	3	4	14	3.5	4	3	4	3	14	3.5	3
306	Central	Central	Female	68	60-69	Married	Buddhist	Non-govt. employee	15000	1000 and over	Lower education (below bachelor)	Good	3	Yes	3	3	3	3	12	0	3	1	1	0	1	1	1	0	1	1	0	1	1	9	0.75	0	4	4	4	4	16	4	4	3	4	4	15	3.75	4
307	Central	Central	Male	73	70 and over	Married	Buddhist	Non-govt. employee	5000	1000 and over	Lower education (below bachelor)	Neutral	2	Yes	3	3	3	3	12	0	3	1	1	1	1	0	1	1	0	1	1	1	1	10	0.833333	1	4	4	4	4	16	4	4	3	4	4	15	3.75	4
308	Central	Central	Male	62	60-69	Married	Buddhist	Non-govt. employee	15000	1000 and over	Lower education (below bachelor)	Neutral	0	No	3	4	3	4	14	1	3.5	1	1	1	1	1	1	1	1	1	0	1	1	11	0.916667	1	4	3	3	4	14	3.5	3	4	3	4	14	3.5	4
309	Central	Central	Female	71	70 and over	Divorced	Buddhist	Non-govt. employee	6000	1000 and over	Lower education (below bachelor)	Neutral	2	Yes	4	3	3	4	14	1	3.5	1	1	1	1	1	1	1	1	1	1	1	0	11	0.916667	1	4	4	4	4	16	4	3	3	4	4	14	3.5	4
310	Central	Central	Male	65	60-69	Married	Buddhist	Govt. employee	15000	1000 and over	Lower education (below bachelor)	Neutral	0	No	3	3	3	3	12	0	3	1	1	0	1	1	1	0	1	1	0	1	1	9	0.75	0	4	3	3	3	13	3.25	3	3	4	3	13	3.25	4
311	Central	Central	Male	64	60-69	Married	Buddhist	Non-govt. employee	6000	1000 and over	Lower education (below bachelor)	Neutral	0	No	3	3	3	3	12	0	3	1	1	1	1	1	1	1	0	1	0	1	1	10	0.833333	1	4	4	3	3	14	3.5	3	3	3	4	13	3.25	3
312	Central	Central	Male	61	60-69	Married	Buddhist	Non-govt. employee	20000	1000 and over	Lower education (below bachelor)	Neutral	0	No	3	3	3	3	12	0	3	1	1	1	1	1	1	1	1	1	0	0	0	9	0.75	0	3	3	3	3	12	3	4	3	3	4	14	3.5	3
313	Central	Central	Male	65	60-69	Married	Buddhist	Non-govt. employee	4000	1000 and over	Lower education (below bachelor)	Neutral	0	No	3	3	3	3	12	0	3	1	1	1	1	1	1	1	1	1	0	0	0	9	0.75	0	4	4	3	3	14	3.5	4	3	3	3	13	3.25	4
314	Central	Central	Female	61	60-69	Married	Buddhist	Non-govt. employee	1500	1000 and over	Lower education (below bachelor)	Neutral	1	Yes	3	3	3	3	12	0	3	1	1	1	1	1	1	1	1	1	1	0	1	11	0.916667	1	4	4	4	4	16	4	3	3	3	4	13	3.25	3
315	Central	Central	Male	65	60-69	Married	Buddhist	Govt. employee	25000	1000 and over	Higher education (above bachelor)	Neutral	0	No	3	4	4	4	15	1	3.75	1	1	1	1	1	1	1	1	1	0	1	1	11	0.916667	1	4	4	4	4	16	4	4	3	3	3	13	3.25	4
316	Central	Central	Male	71	70 and over	Married	Buddhist	Non-govt. employee	10000	1000 and over	Lower education (below bachelor)	Neutral	3	Yes	3	3	3	3	12	0	3	1	1	1	0	1	1	0	0	1	0	1	1	8	0.666667	0	4	4	4	4	16	4	3	3	3	4	13	3.25	3
317	Central	Central	Female	73	70 and over	Married	Buddhist	Non-govt. employee	1500	1000 and over	Lower education (below bachelor)	Neutral	2	Yes	3	3	3	3	12	0	3	1	1	1	1	1	1	1	1	1	1	0	1	11	0.916667	1	4	4	4	4	16	4	3	4	3	4	14	3.5	3
318	Central	Central	Male	75	70 and over	Married	Buddhist	Unemployed	1000	1000 and over	Lower education (below bachelor)	Neutral	1	Yes	3	3	3	3	12	0	3	1	1	1	1	1	1	1	1	1	0	1	1	11	0.916667	1	4	4	4	4	16	4	3	3	4	4	14	3.5	3
319	Central	Central	Female	72	70 and over	Divorced	Buddhist	Non-govt. employee	1500	1000 and over	Lower education (below bachelor)	Neutral	0	No	4	4	4	4	16	1	4	1	1	1	1	1	1	1	1	0	1	1	1	11	0.916667	1	4	4	4	4	16	4	2	3	3	4	12	3	4
320	Central	Central	Female	70	70 and over	Divorced	Buddhist	Non-govt. employee	3000	1000 and over	Lower education (below bachelor)	Good	2	Yes	3	3	3	3	12	0	3	1	1	1	1	1	1	1	1	1	1	1	0	11	0.916667	1	4	4	4	3	15	3.75	3	3	3	4	13	3.25	3
321	Central	Central	Male	69	60-69	Married	Buddhist	Unemployed	1000	1000 and over	Lower education (below bachelor)	Neutral	1	Yes	3	3	3	3	12	0	3	1	1	1	1	1	1	1	1	1	0	1	1	11	0.916667	1	4	4	4	3	15	3.75	3	3	4	4	14	3.5	4
322	Central	Central	Male	61	60-69	Married	Buddhist	Non-govt. employee	4000	1000 and over	Lower education (below bachelor)	Neutral	3	Yes	4	4	3	4	15	1	3.75	1	1	1	1	1	1	1	1	1	1	1	0	11	0.916667	1	4	4	3	4	15	3.75	4	3	4	4	15	3.75	4
323	Central	Central	Male	66	60-69	Married	Buddhist	Non-govt. employee	1000	1000 and over	Lower education (below bachelor)	Neutral	2	Yes	4	4	3	3	14	1	3.5	1	1	1	1	1	1	1	1	1	1	1	1	12	1	1	4	4	4	4	16	4	4	4	4	3	15	3.75	4
324	Central	Central	Male	74	70 and over	Married	Buddhist	Govt. employee	22000	1000 and over	Lower education (below bachelor)	Neutral	0	No	4	4	3	3	14	1	3.5	1	1	1	1	1	1	1	1	1	1	0	1	11	0.916667	1	4	4	3	4	15	3.75	3	2	4	4	13	3.25	4
325	Central	Central	Female	71	70 and over	Married	Buddhist	Non-govt. employee	2000	1000 and over	Lower education (below bachelor)	Neutral	1	Yes	4	4	3	3	14	1	3.5	1	1	1	1	1	1	1	1	1	0	1	1	11	0.916667	1	4	4	4	3	15	3.75	3	3	4	3	13	3.25	4
326	Central	Central	Male	67	60-69	Married	Buddhist	Non-govt. employee	5000	1000 and over	Lower education (below bachelor)	Neutral	0	No	4	4	3	4	15	1	3.75	1	1	1	1	1	1	1	0	1	1	1	1	11	0.916667	1	4	4	4	4	16	4	2	4	4	4	14	3.5	4
327	Central	Central	Male	66	60-69	Married	Buddhist	Govt. employee	18000	1000 and over	Bachelor	Neutral	0	No	3	3	3	3	12	0	3	1	1	1	1	1	1	1	1	1	1	1	1	12	1	1	4	4	4	3	15	3.75	3	2	4	4	13	3.25	4
328	Central	Central	Female	62	60-69	Married	Christian	Non-govt. employee	3500	1000 and over	Lower education (below bachelor)	Neutral	1	Yes	4	4	3	4	15	1	3.75	1	1	1	1	1	1	1	0	1	0	1	1	10	0.833333	1	4	4	3	4	15	3.75	3	3	4	3	13	3.25	4
329	Central	Central	Female	63	60-69	Divorced	Buddhist	Non-govt. employee	6000	1000 and over	Lower education (below bachelor)	Neutral	0	No	4	4	3	3	14	1	3.5	1	1	1	1	1	1	0	1	0	0	1	1	9	0.75	0	4	4	4	3	15	3.75	4	3	3	3	13	3.25	4
330	Central	Central	Female	75	70 and over	Divorced	Buddhist	Unemployed	700	Less than 1000	Lower education (below bachelor)	Good	1	Yes	3	4	3	3	13	0	3.25	1	1	1	1	1	1	1	1	1	0	1	1	11	0.916667	1	4	4	4	4	16	4	3	3	4	3	13	3.25	4
331	Central	Central	Male	72	70 and over	Married	Buddhist	Unemployed	1200	1000 and over	Lower education (below bachelor)	Neutral	1	Yes	3	3	3	3	12	0	3	1	1	1	0	0	1	1	1	1	0	1	1	9	0.75	0	4	4	3	4	15	3.75	3	3	3	4	13	3.25	4
332	Central	Central	Male	66	60-69	Married	Buddhist	Govt. employee	25000	1000 and over	Lower education (below bachelor)	Neutral	0	No	4	4	3	3	14	1	3.5	1	1	0	1	1	1	1	1	1	1	1	1	11	0.916667	1	4	4	4	4	16	4	4	4	3	3	14	3.5	4
333	Central	Central	Female	61	60-69	Married	Buddhist	Non-govt. employee	600	Less than 1000	Lower education (below bachelor)	Neutral	0	No	4	4	3	4	15	1	3.75	1	1	1	1	1	1	1	1	1	1	1	1	12	1	1	4	4	3	4	15	3.75	4	2	4	4	14	3.5	4
334	Central	Central	Male	72	70 and over	Married	Buddhist	Non-govt. employee	12000	1000 and over	Lower education (below bachelor)	Neutral	0	No	3	3	3	3	12	0	3	1	1	1	1	1	1	1	1	1	1	1	1	12	1	1	4	4	4	4	16	4	4	4	4	4	16	4	4
335	Central	Central	Female	69	60-69	Married	Buddhist	Non-govt. employee	5500	1000 and over	Lower education (below bachelor)	Neutral	1	Yes	3	4	4	3	14	1	3.5	1	1	1	1	1	1	1	1	1	0	1	1	11	0.916667	1	4	4	4	4	16	4	4	4	4	4	16	4	3
336	Central	Central	Male	69	60-69	Married	Buddhist	Non-govt. employee	12000	1000 and over	Lower education (below bachelor)	Good	2	Yes	3	3	3	3	12	0	3	1	1	1	1	1	1	1	1	1	0	1	1	11	0.916667	1	4	4	4	4	16	4	4	4	4	4	16	4	4
337	Central	Central	Male	64	60-69	Married	Buddhist	Non-govt. employee	8000	1000 and over	Lower education (below bachelor)	Neutral	0	No	3	4	3	4	14	1	3.5	1	1	1	1	1	1	1	1	1	0	1	1	11	0.916667	1	4	4	4	4	16	4	4	4	4	4	16	4	4
338	Central	Central	Female	61	60-69	Married	Buddhist	Non-govt. employee	600	Less than 1000	Lower education (below bachelor)	Good	0	No	3	4	3	3	13	0	3.25	1	1	1	1	1	1	1	0	0	1	1	1	10	0.833333	1	4	4	3	3	14	3.5	4	4	4	4	16	4	4
339	Central	Central	Male	60	60-69	Married	Buddhist	Non-govt. employee	10000	1000 and over	Lower education (below bachelor)	Neutral	0	No	3	3	3	4	13	0	3.25	1	1	1	1	1	1	1	1	0	0	1	1	10	0.833333	1	4	3	4	4	15	3.75	4	4	4	4	16	4	4
340	Central	Central	Male	64	60-69	Married	Buddhist	Govt. employee	22000	1000 and over	Lower education (below bachelor)	Neutral	0	No	3	3	3	4	13	0	3.25	1	1	1	1	1	1	1	1	1	1	1	1	12	1	1	4	4	4	4	16	4	4	4	4	4	16	4	4
341	Central	Central	Female	72	70 and over	Married	Buddhist	Unemployed	700	Less than 1000	Lower education (below bachelor)	Good	2	Yes	3	3	3	3	12	0	3	1	0	1	1	1	1	0	0	1	1	1	1	9	0.75	0	4	4	4	4	16	4	4	4	4	4	16	4	4
342	Central	Central	Male	64	60-69	Married	Buddhist	Non-govt. employee	25000	1000 and over	Higher education (above bachelor)	Neutral	0	No	4	4	4	3	15	1	3.75	1	1	1	1	1	1	1	0	0	0	0	1	8	0.666667	0	4	4	4	3	15	3.75	4	4	4	4	16	4	4
343	Central	Central	Male	63	60-69	Married	Buddhist	Non-govt. employee	5000	1000 and over	Lower education (below bachelor)	Neutral	0	No	3	3	4	3	13	0	3.25	1	1	1	1	1	1	0	0	0	0	0	1	7	0.583333	0	4	4	4	4	16	4	3	2	4	4	13	3.25	4
344	Central	Central	Male	74	70 and over	Married	Buddhist	Unemployed	1000	1000 and over	Lower education (below bachelor)	Good	3	Yes	4	4	3	3	14	1	3.5	1	1	1	1	1	1	1	0	0	0	0	0	7	0.583333	0	4	4	3	4	15	3.75	4	2	4	4	14	3.5	4
345	Central	Central	Male	64	60-69	Married	Buddhist	Non-govt. employee	9000	1000 and over	Lower education (below bachelor)	Good	2	Yes	3	3	4	3	13	0	3.25	1	1	1	1	1	1	1	1	0	0	0	0	8	0.666667	0	4	4	4	4	16	4	4	3	4	4	15	3.75	4
346	Central	Central	Female	67	60-69	Divorced	Buddhist	Unemployed	600	Less than 1000	Uneducated	Very good	3	Yes	3	3	4	4	14	1	3.5	1	1	1	0	1	1	1	0	0	1	0	0	7	0.583333	0	4	4	4	3	15	3.75	4	4	4	4	16	4	3
347	Central	Central	Female	68	60-69	Married	Buddhist	Non-govt. employee	15000	1000 and over	Lower education (below bachelor)	Neutral	2	Yes	4	4	4	4	16	1	4	1	1	1	1	1	1	1	1	1	0	0	1	10	0.833333	1	4	4	3	4	15	3.75	4	4	4	4	16	4	4
348	Central	Central	Female	63	60-69	Married	Buddhist	Non-govt. employee	5000	1000 and over	Lower education (below bachelor)	Good	2	Yes	4	4	3	4	15	1	3.75	1	1	1	1	1	1	1	0	0	0	0	0	7	0.583333	0	4	4	4	4	16	4	3	4	4	4	15	3.75	4
349	Central	Central	Male	69	60-69	Married	Buddhist	Non-govt. employee	6000	1000 and over	Lower education (below bachelor)	Good	3	Yes	3	3	3	3	12	0	3	1	1	0	1	1	1	0	1	1	1	1	1	10	0.833333	1	4	4	4	4	16	4	3	4	4	4	15	3.75	4
350	Central	Central	Female	65	60-69	Married	Buddhist	Non-govt. employee	5000	1000 and over	Lower education (below bachelor)	Neutral	2	Yes	4	4	4	4	16	1	4	1	1	1	1	1	1	1	1	0	1	1	1	11	0.916667	1	4	4	4	4	16	4	4	4	4	4	16	4	4
351	Central	Central	Male	63	60-69	Married	Buddhist	Non-govt. employee	7000	1000 and over	Uneducated	Good	2	Yes	3	3	3	3	12	0	3	1	1	1	1	0	1	0	1	0	1	0	0	7	0.583333	0	4	4	4	3	15	3.75	3	3	4	4	14	3.5	4
352	Central	Central	Male	70	70 and over	Divorced	Buddhist	Unemployed	1000	1000 and over	Lower education (below bachelor)	Good	1	Yes	4	4	3	3	14	1	3.5	1	1	1	1	1	0	1	0	1	0	0	0	7	0.583333	0	4	4	4	4	16	4	3	4	4	4	15	3.75	4
353	Central	Central	Female	70	70 and over	Married	Buddhist	Unemployed	5000	1000 and over	Lower education (below bachelor)	Neutral	3	Yes	3	3	4	3	13	0	3.25	0	1	1	0	1	1	0	0	0	1	1	0	6	0.5	0	4	4	4	4	16	4	4	4	4	4	16	4	4
354	Central	Central	Male	70	70 and over	Single	Buddhist	Non-govt. employee	3000	1000 and over	Lower education (below bachelor)	Neutral	1	Yes	4	4	4	4	16	1	4	1	1	1	1	1	1	0	1	1	0	0	1	9	0.75	0	4	4	4	4	16	4	4	4	4	4	16	4	4
355	Central	Central	Female	63	60-69	Married	Buddhist	Non-govt. employee	3500	1000 and over	Lower education (below bachelor)	Good	0	No	4	4	4	4	16	1	4	1	1	1	1	1	1	1	1	1	0	1	0	10	0.833333	1	4	4	4	4	16	4	4	3	3	3	13	3.25	4
356	Central	Central	Male	65	60-69	Divorced	Buddhist	Non-govt. employee	5000	1000 and over	Lower education (below bachelor)	Good	2	Yes	3	3	3	3	12	0	3	0	0	1	0	1	1	0	1	1	1	1	0	7	0.583333	0	4	4	4	4	16	4	4	4	4	4	16	4	4
357	Central	Central	Female	62	60-69	Married	Buddhist	Non-govt. employee	6000	1000 and over	Lower education (below bachelor)	Neutral	1	Yes	4	4	4	3	15	1	3.75	1	1	0	1	0	0	1	0	0	1	1	1	7	0.583333	0	4	4	4	4	16	4	3	4	4	3	14	3.5	4
358	Central	Central	Female	72	70 and over	Divorced	Buddhist	Unemployed	4000	1000 and over	Lower education (below bachelor)	Very good	3	Yes	3	4	3	3	13	0	3.25	1	1	1	1	0	1	1	0	1	1	1	1	10	0.833333	1	4	4	4	4	16	4	4	4	4	4	16	4	4
359	Central	Central	Male	68	60-69	Divorced	Buddhist	Non-govt. employee	5000	1000 and over	Lower education (below bachelor)	Good	2	Yes	3	3	3	4	13	0	3.25	0	0	1	0	1	0	1	0	1	1	0	1	6	0.5	0	4	4	4	4	16	4	4	4	4	4	16	4	4
360	Central	Central	Female	72	70 and over	Divorced	Buddhist	Non-govt. employee	3000	1000 and over	Lower education (below bachelor)	Good	3	Yes	3	3	3	3	12	0	3	0	1	1	1	1	0	1	0	1	0	1	1	8	0.666667	0	4	4	4	4	16	4	4	4	4	4	16	4	3
361	Central	Central	Female	62	60-69	Married	Buddhist	Non-govt. employee	8000	1000 and over	Lower education (below bachelor)	Neutral	0	No	3	3	4	4	14	1	3.5	1	1	1	1	1	1	1	1	1	1	0	0	10	0.833333	1	4	4	4	4	16	4	4	3	3	3	13	3.25	4
362	Central	Central	Male	60	60-69	Married	Buddhist	Non-govt. employee	9000	1000 and over	Lower education (below bachelor)	Neutral	1	Yes	4	3	3	4	14	1	3.5	1	1	1	1	1	1	1	1	1	0	1	1	11	0.916667	1	4	4	4	4	16	4	4	4	4	4	16	4	4
363	Central	Central	Female	66	60-69	Married	Buddhist	Non-govt. employee	7000	1000 and over	Lower education (below bachelor)	Good	3	Yes	3	4	4	3	14	1	3.5	0	1	0	1	1	1	1	1	1	1	0	1	9	0.75	0	4	4	4	4	16	4	4	4	4	4	16	4	4
364	Central	Central	Male	68	60-69	Divorced	Buddhist	Non-govt. employee	3500	1000 and over	Lower education (below bachelor)	Neutral	2	Yes	3	4	4	3	14	1	3.5	1	1	1	1	1	1	1	1	1	1	1	1	12	1	1	4	4	4	4	16	4	4	4	3	3	14	3.5	4
365	Central	Central	Male	71	70 and over	Married	Buddhist	Unemployed	2500	1000 and over	Lower education (below bachelor)	Neutral	1	Yes	4	4	4	3	15	1	3.75	1	1	1	1	1	1	1	1	1	1	0	1	11	0.916667	1	4	4	4	4	16	4	4	4	4	4	16	4	4
366	Central	Central	Female	67	60-69	Divorced	Buddhist	Non-govt. employee	4000	1000 and over	Lower education (below bachelor)	Neutral	2	Yes	3	4	3	3	13	0	3.25	0	1	1	1	1	0	1	1	1	1	1	1	10	0.833333	1	4	4	4	4	16	4	3	4	4	4	15	3.75	4
367	Central	Central	Female	69	60-69	Divorced	Buddhist	Non-govt. employee	5000	1000 and over	Lower education (below bachelor)	Neutral	2	Yes	3	4	3	4	14	1	3.5	1	1	1	1	1	1	0	1	1	1	1	1	11	0.916667	1	4	4	4	4	16	4	4	4	4	4	16	4	4
368	Central	Central	Male	70	70 and over	Married	Buddhist	Non-govt. employee	6000	1000 and over	Lower education (below bachelor)	Neutral	2	Yes	3	4	3	4	14	1	3.5	1	1	1	1	1	1	1	1	1	0	0	1	10	0.833333	1	4	4	4	4	16	4	4	4	4	4	16	4	4
369	Central	Central	Female	68	60-69	Single	Buddhist	Non-govt. employee	8000	1000 and over	Lower education (below bachelor)	Bad	0	No	4	4	4	4	16	1	4	1	1	1	1	1	0	1	1	1	1	1	1	11	0.916667	1	4	4	4	4	16	4	4	3	4	4	15	3.75	4
370	Central	Central	Male	65	60-69	Divorced	Buddhist	Non-govt. employee	3000	1000 and over	Lower education (below bachelor)	Good	2	Yes	3	4	3	4	14	1	3.5	1	1	1	1	1	0	1	0	1	0	0	0	7	0.583333	0	4	4	4	4	16	4	4	4	4	4	16	4	4
371	Central	Central	Female	70	70 and over	Married	Buddhist	Unemployed	2000	1000 and over	Uneducated	Neutral	1	Yes	3	3	3	3	12	0	3	1	1	0	0	1	1	1	1	1	0	0	1	8	0.666667	0	3	3	3	3	12	3	3	3	3	3	12	3	4
372	Central	Central	Female	68	60-69	Single	Buddhist	Non-govt. employee	2500	1000 and over	Uneducated	Good	2	Yes	3	4	3	3	13	0	3.25	1	1	1	1	1	1	1	1	1	0	0	0	9	0.75	0	4	4	3	4	15	3.75	4	4	4	4	16	4	4
373	Central	Central	Male	64	60-69	Divorced	Buddhist	Non-govt. employee	3500	1000 and over	Lower education (below bachelor)	Good	3	Yes	3	4	3	3	13	0	3.25	1	1	0	1	1	1	1	1	1	1	1	0	10	0.833333	1	4	4	4	4	16	4	4	4	4	4	16	4	3
374	Central	Central	Male	70	70 and over	Single	Buddhist	Non-govt. employee	4000	1000 and over	Uneducated	Good	2	Yes	3	3	3	3	12	0	3	1	1	1	1	1	0	1	1	1	0	1	1	10	0.833333	1	4	4	4	3	15	3.75	4	4	4	4	16	4	4
375	Central	Central	Female	68	60-69	Divorced	Buddhist	Non-govt. employee	4500	1000 and over	Lower education (below bachelor)	Good	3	Yes	3	4	3	4	14	1	3.5	1	1	1	1	1	1	1	1	1	0	0	1	10	0.833333	1	4	4	4	4	16	4	3	4	4	4	15	3.75	4
376	Central	Central	Female	74	70 and over	Married	Buddhist	Non-govt. employee	5000	1000 and over	Lower education (below bachelor)	Good	4	Yes	3	4	4	4	15	1	3.75	1	1	1	1	1	1	0	1	1	1	1	1	11	0.916667	1	4	4	4	4	16	4	4	4	4	4	16	4	4
377	Central	Central	Female	63	60-69	Single	Buddhist	Non-govt. employee	8000	1000 and over	Lower education (below bachelor)	Neutral	1	Yes	3	3	3	3	12	0	3	1	1	1	1	1	1	1	1	0	0	0	0	8	0.666667	0	3	4	4	4	15	3.75	3	4	4	4	15	3.75	4
378	Central	Central	Female	68	60-69	Divorced	Buddhist	Non-govt. employee	6500	1000 and over	Lower education (below bachelor)	Good	3	Yes	3	4	4	4	15	1	3.75	1	1	0	1	1	1	1	1	1	1	1	1	11	0.916667	1	4	4	4	4	16	4	3	3	4	4	14	3.5	4
379	Central	Central	Male	73	70 and over	Divorced	Buddhist	Unemployed	3000	1000 and over	Lower education (below bachelor)	Good	2	Yes	4	4	4	4	16	1	4	1	1	0	1	0	1	1	1	1	1	1	0	9	0.75	0	4	4	4	4	16	4	4	3	4	4	15	3.75	4
380	Central	Central	Male	66	60-69	Married	Buddhist	Non-govt. employee	9000	1000 and over	Lower education (below bachelor)	Bad	0	No	3	4	4	4	15	1	3.75	1	1	1	0	1	1	1	0	1	0	1	1	9	0.75	0	4	4	4	3	15	3.75	3	3	4	4	14	3.5	4
381	Central	Central	Female	67	60-69	Divorced	Buddhist	Non-govt. employee	5000	1000 and over	Lower education (below bachelor)	Good	3	Yes	3	4	4	4	15	1	3.75	1	1	1	1	0	1	1	1	1	0	0	1	9	0.75	0	4	4	4	4	16	4	4	3	4	4	15	3.75	4
382	Central	Central	Female	61	60-69	Married	Buddhist	Non-govt. employee	8000	1000 and over	Lower education (below bachelor)	Bad	0	No	3	3	3	3	12	0	3	1	1	1	1	1	1	0	0	0	0	1	1	8	0.666667	0	4	4	4	4	16	4	3	4	4	4	15	3.75	4
383	Central	Central	Male	68	60-69	Divorced	Buddhist	Non-govt. employee	4000	1000 and over	Lower education (below bachelor)	Good	3	Yes	4	4	3	4	15	1	3.75	1	1	0	1	0	1	0	1	1	1	1	1	9	0.75	0	4	4	4	4	16	4	4	3	4	4	15	3.75	4
384	Central	Central	Male	68	60-69	Divorced	Buddhist	Non-govt. employee	5000	1000 and over	Lower education (below bachelor)	Good	2	Yes	3	4	4	4	15	1	3.75	1	0	0	1	1	1	1	1	1	1	1	1	10	0.833333	1	4	4	4	4	16	4	4	4	4	4	16	4	3
385	Central	Central	Male	69	60-69	Married	Buddhist	Non-govt. employee	8000	1000 and over	Lower education (below bachelor)	Neutral	0	No	3	3	3	4	13	0	3.25	1	1	0	1	0	0	0	1	1	1	1	1	8	0.666667	0	4	4	4	4	16	4	4	4	4	4	16	4	4
386	Central	Central	Male	74	70 and over	Married	Buddhist	Unemployed	2500	1000 and over	Lower education (below bachelor)	Good	3	Yes	3	3	4	4	14	1	3.5	1	1	1	1	1	0	1	0	1	1	1	1	10	0.833333	1	4	4	4	3	15	3.75	3	3	4	3	13	3.25	4
387	Central	Central	Female	65	60-69	Divorced	Buddhist	Non-govt. employee	4000	1000 and over	Lower education (below bachelor)	Good	2	Yes	3	3	3	4	13	0	3.25	1	1	1	1	1	0	1	1	1	1	1	1	11	0.916667	1	4	4	4	3	15	3.75	4	4	4	4	16	4	4
388	Central	Central	Female	71	70 and over	Married	Buddhist	Unemployed	4500	1000 and over	Lower education (below bachelor)	Neutral	2	Yes	3	4	3	3	13	0	3.25	1	1	1	0	0	1	0	1	0	1	1	0	7	0.583333	0	4	4	4	3	15	3.75	4	4	4	4	16	4	4
389	Central	Central	Female	68	60-69	Divorced	Buddhist	Non-govt. employee	4000	1000 and over	Lower education (below bachelor)	Good	3	Yes	3	4	3	3	13	0	3.25	1	0	1	1	1	0	1	1	0	1	1	0	8	0.666667	0	4	4	4	4	16	4	4	4	4	4	16	4	4
390	Central	Central	Male	60	60-69	Single	Buddhist	Non-govt. employee	7000	1000 and over	Lower education (below bachelor)	Neutral	1	Yes	3	3	3	4	13	0	3.25	1	1	1	0	1	1	1	1	0	0	1	1	9	0.75	0	4	4	4	4	16	4	4	3	4	4	15	3.75	3
391	Central	Central	Female	68	60-69	Married	Buddhist	Non-govt. employee	3000	1000 and over	Lower education (below bachelor)	Neutral	3	Yes	3	4	3	4	14	1	3.5	1	1	1	1	1	1	1	1	1	1	1	1	12	1	1	4	4	4	4	16	4	4	4	4	4	16	4	3
392	Central	Central	Male	63	60-69	Single	Buddhist	Non-govt. employee	4000	1000 and over	Lower education (below bachelor)	Neutral	0	No	3	3	3	3	12	0	3	1	1	0	1	1	1	0	1	1	1	1	0	9	0.75	0	4	4	4	4	16	4	4	4	4	4	16	4	4
393	Central	Central	Male	67	60-69	Divorced	Buddhist	Non-govt. employee	4000	1000 and over	Lower education (below bachelor)	Good	3	Yes	3	3	4	3	13	0	3.25	1	1	1	0	1	1	1	0	1	1	1	0	9	0.75	0	4	4	4	4	16	4	3	3	4	4	14	3.5	4
394	Central	Central	Female	61	60-69	Single	Buddhist	Unemployed	3000	1000 and over	Lower education (below bachelor)	Neutral	1	Yes	3	3	4	4	14	1	3.5	1	1	0	1	1	1	1	1	0	1	1	0	9	0.75	0	4	4	4	4	16	4	4	4	4	2	14	3.5	4
395	Central	Central	Female	65	60-69	Divorced	Buddhist	Non-govt. employee	5000	1000 and over	Lower education (below bachelor)	Good	3	Yes	3	4	3	4	14	1	3.5	1	1	1	1	1	1	1	1	1	0	1	0	10	0.833333	1	4	4	4	4	16	4	4	4	4	4	16	4	4
396	Central	Central	Female	68	60-69	Divorced	Buddhist	Non-govt. employee	4500	1000 and over	Lower education (below bachelor)	Very good	4	Yes	3	4	3	3	13	0	3.25	1	1	1	1	0	1	1	1	0	0	1	0	8	0.666667	0	4	4	4	4	16	4	4	4	4	4	16	4	4
397	Northeast	Northeast	Female	61	60-69	Married	Buddhist	Unemployed	200000	1000 and over	Lower education (below bachelor)	Very good	1	Yes	4	3	3	4	14	1	3.5	1	1	1	1	1	0	0	0	1	1	1	1	9	0.75	0	4	4	4	4	16	4	3	3	4	4	14	3.5	4
398	Northeast	Northeast	Female	71	70 and over	Single	Buddhist	Unemployed	150000	1000 and over	Lower education (below bachelor)	Neutral	2	Yes	4	3	3	3	13	0	3.25	1	1	1	1	1	1	1	1	0	1	0	1	10	0.833333	1	3	4	4	4	15	3.75	3	3	4	3	13	3.25	4
399	Northeast	Northeast	Male	63	60-69	Divorced	Buddhist	Non-govt. employee	250000	1000 and over	Lower education (below bachelor)	Neutral	0	No	4	4	3	3	14	1	3.5	1	1	0	1	1	0	1	0	1	1	0	0	7	0.583333	0	4	4	3	3	14	3.5	4	3	3	4	14	3.5	4
400	Northeast	Northeast	Female	75	70 and over	Divorced	Buddhist	Unemployed	700	Less than 1000	Lower education (below bachelor)	Bad	0	No	4	4	3	3	14	1	3.5	1	1	1	1	0	1	0	1	0	1	1	1	9	0.75	0	4	4	4	4	16	4	4	3	3	3	13	3.25	4
401	Northeast	Northeast	Female	60	60-69	Married	Buddhist	Non-govt. employee	10000	1000 and over	Lower education (below bachelor)	Neutral	0	No	4	4	3	4	15	1	3.75	1	1	1	1	1	1	1	1	1	1	1	1	12	1	1	4	4	3	4	15	3.75	3	3	3	4	13	3.25	4
402	Northeast	Northeast	Female	67	60-69	Married	Buddhist	Unemployed	600	Less than 1000	Lower education (below bachelor)	Good	1	Yes	3	3	3	4	13	0	3.25	1	1	1	1	1	0	1	1	1	0	1	1	10	0.833333	1	4	4	4	4	16	4	3	3	3	4	13	3.25	4
403	Northeast	Northeast	Female	75	70 and over	Divorced	Buddhist	Unemployed	700	Less than 1000	Lower education (below bachelor)	Good	0	No	3	3	3	3	12	0	3	0	1	0	1	1	0	1	1	1	1	1	1	9	0.75	0	4	4	4	4	16	4	4	4	4	3	15	3.75	4
404	Northeast	Northeast	Male	75	70 and over	Married	Buddhist	Unemployed	700	Less than 1000	Lower education (below bachelor)	Good	0	No	3	4	3	3	13	0	3.25	1	1	1	1	1	1	0	0	1	1	1	1	10	0.833333	1	4	4	4	3	15	3.75	3	2	3	4	12	3	4
405	Northeast	Northeast	Female	69	60-69	Married	Buddhist	Unemployed	600	Less than 1000	Lower education (below bachelor)	Good	1	Yes	3	4	3	4	14	1	3.5	1	1	1	1	1	1	1	1	0	1	1	1	11	0.916667	1	3	3	3	3	12	3	4	4	4	3	15	3.75	4
406	Northeast	Northeast	Male	70	70 and over	Married	Buddhist	Non-govt. employee	600	Less than 1000	Lower education (below bachelor)	Neutral	0	No	4	3	3	3	13	0	3.25	1	1	1	1	1	1	1	1	1	1	0	1	11	0.916667	1	4	4	4	4	16	4	4	3	4	4	15	3.75	4
407	Northeast	Northeast	Female	68	60-69	Single	Buddhist	Unemployed	3000	1000 and over	Lower education (below bachelor)	Good	2	Yes	4	4	4	4	16	1	4	1	1	1	1	1	0	1	1	1	1	1	1	11	0.916667	1	4	4	4	4	16	4	4	3	3	4	14	3.5	4
408	Northeast	Northeast	Female	62	60-69	Married	Buddhist	Non-govt. employee	3000	1000 and over	Lower education (below bachelor)	Good	0	No	4	3	3	3	13	0	3.25	1	1	1	1	1	1	1	1	1	0	1	1	11	0.916667	1	4	4	3	3	14	3.5	4	4	4	3	15	3.75	4
409	Northeast	Northeast	Male	72	70 and over	Single	Buddhist	Non-govt. employee	5000	1000 and over	Lower education (below bachelor)	Neutral	1	Yes	4	4	4	4	16	1	4	1	1	1	1	1	1	1	1	1	1	1	1	12	1	1	4	4	4	4	16	4	4	3	4	4	15	3.75	4
410	Northeast	Northeast	Female	62	60-69	Married	Buddhist	Non-govt. employee	3000	1000 and over	Lower education (below bachelor)	Good	0	No	4	4	4	4	16	1	4	1	1	1	1	1	1	1	1	1	1	1	1	12	1	1	4	4	4	4	16	4	3	4	4	2	13	3.25	4
411	Northeast	Northeast	Female	65	60-69	Married	Buddhist	Non-govt. employee	3000	1000 and over	Lower education (below bachelor)	Neutral	0	No	4	4	4	4	16	1	4	1	1	1	1	1	1	0	1	1	0	1	1	10	0.833333	1	4	4	4	4	16	4	4	4	4	4	16	4	4
412	Northeast	Northeast	Female	65	60-69	Married	Buddhist	Non-govt. employee	2000	1000 and over	Lower education (below bachelor)	Neutral	0	No	4	4	4	4	16	1	4	1	1	1	1	1	1	1	1	1	1	1	1	12	1	1	4	4	4	4	16	4	4	3	3	4	14	3.5	4
413	Northeast	Northeast	Female	62	60-69	Married	Buddhist	Non-govt. employee	4000	1000 and over	Lower education (below bachelor)	Good	1	Yes	4	4	4	3	15	1	3.75	1	1	1	1	1	1	1	1	1	0	1	1	11	0.916667	1	4	4	3	3	14	3.5	4	4	4	4	16	4	4
414	Northeast	Northeast	Female	74	70 and over	Married	Buddhist	Govt. employee	10000	1000 and over	Bachelor	Good	1	Yes	4	3	4	3	14	1	3.5	1	1	0	1	1	1	1	1	1	1	1	0	10	0.833333	1	4	4	4	4	16	4	4	4	4	4	16	4	4
415	Northeast	Northeast	Female	74	70 and over	Married	Buddhist	Unemployed	2000	1000 and over	Lower education (below bachelor)	Neutral	1	Yes	3	3	3	4	13	0	3.25	1	1	1	1	1	1	0	1	1	0	1	1	10	0.833333	1	4	4	4	4	16	4	2	3	4	4	13	3.25	4
416	Northeast	Northeast	Female	75	70 and over	Married	Buddhist	Unemployed	800	Less than 1000	Lower education (below bachelor)	Very good	3	Yes	3	4	4	4	15	1	3.75	1	1	0	1	1	0	1	0	1	0	1	1	8	0.666667	0	4	4	4	4	16	4	3	2	4	4	13	3.25	4
417	Northeast	Northeast	Male	75	70 and over	Married	Buddhist	Unemployed	800	Less than 1000	Lower education (below bachelor)	Good	0	No	3	3	3	4	13	0	3.25	1	1	1	1	1	1	1	1	1	0	1	1	11	0.916667	1	4	4	4	4	16	4	3	3	3	4	13	3.25	4
418	Northeast	Northeast	Female	73	70 and over	Married	Buddhist	Non-govt. employee	7000	1000 and over	Lower education (below bachelor)	Neutral	0	No	2	4	4	4	14	1	3.5	1	1	1	1	1	1	1	1	1	1	0	1	11	0.916667	1	4	4	4	4	16	4	4	3	3	2	12	3	4
419	Northeast	Northeast	Female	73	70 and over	Divorced	Buddhist	Unemployed	1200	1000 and over	Lower education (below bachelor)	Neutral	0	No	3	3	3	3	12	0	3	1	1	1	1	1	0	1	1	1	0	1	1	10	0.833333	1	4	4	4	4	16	4	2	2	2	2	8	2	4
420	Northeast	Northeast	Male	60	60-69	Married	Buddhist	Govt. employee	60000	1000 and over	Higher education (above bachelor)	Neutral	1	Yes	3	4	3	3	13	0	3.25	1	1	0	1	1	0	1	1	1	1	1	1	10	0.833333	1	4	4	4	4	16	4	3	2	3	4	12	3	4
421	Northeast	Northeast	Female	75	70 and over	Married	Buddhist	Non-govt. employee	800	Less than 1000	Lower education (below bachelor)	Good	1	Yes	3	4	3	3	13	0	3.25	1	1	1	1	1	1	0	1	1	1	1	1	11	0.916667	1	4	4	4	4	16	4	4	4	4	4	16	4	4
422	Northeast	Northeast	Female	63	60-69	Married	Buddhist	Non-govt. employee	15000	1000 and over	Lower education (below bachelor)	Good	1	Yes	3	3	3	3	12	0	3	1	1	1	0	1	1	1	0	1	0	1	1	9	0.75	0	4	4	4	4	16	4	3	4	4	4	15	3.75	4
423	Northeast	Northeast	Female	60	60-69	Married	Buddhist	Non-govt. employee	3000	1000 and over	Lower education (below bachelor)	Good	0	No	3	4	3	3	13	0	3.25	1	1	1	1	1	1	1	1	1	0	1	0	10	0.833333	1	4	4	4	3	15	3.75	2	2	2	2	8	2	4
424	Northeast	Northeast	Male	75	70 and over	Married	Buddhist	Unemployed	800	Less than 1000	Uneducated	Good	3	Yes	3	3	3	3	12	0	3	1	1	1	1	0	0	1	0	0	1	1	1	8	0.666667	0	3	4	4	3	14	3.5	4	4	4	4	16	4	3
425	Northeast	Northeast	Female	64	60-69	Married	Buddhist	Non-govt. employee	5000	1000 and over	Lower education (below bachelor)	Good	1	Yes	4	4	4	3	15	1	3.75	1	1	1	1	1	1	1	1	1	0	1	1	11	0.916667	1	4	4	4	3	15	3.75	4	4	4	3	15	3.75	4
426	Northeast	Northeast	Female	69	60-69	Divorced	Islam	Non-govt. employee	600	Less than 1000	Lower education (below bachelor)	Very good	1	Yes	4	4	3	4	15	1	3.75	1	1	1	0	1	1	0	1	1	0	1	1	9	0.75	0	4	4	4	4	16	4	4	4	4	4	16	4	4
427	Northeast	Northeast	Female	65	60-69	Divorced	Buddhist	Non-govt. employee	600	Less than 1000	Lower education (below bachelor)	Neutral	0	No	4	4	3	4	15	1	3.75	1	1	1	1	1	1	1	1	1	0	1	1	11	0.916667	1	4	4	4	3	15	3.75	4	4	4	4	16	4	4
428	Northeast	Northeast	Female	60	60-69	Married	Buddhist	Non-govt. employee	3000	1000 and over	Lower education (below bachelor)	Bad	0	No	4	4	4	3	15	1	3.75	1	1	1	1	1	1	1	1	1	0	1	0	10	0.833333	1	4	4	3	4	15	3.75	4	4	4	4	16	4	4
429	Northeast	Northeast	Female	64	60-69	Married	Buddhist	Non-govt. employee	600	Less than 1000	Lower education (below bachelor)	Neutral	0	No	4	4	4	4	16	1	4	1	1	0	1	1	1	1	1	1	1	1	1	11	0.916667	1	4	4	4	3	15	3.75	4	4	4	4	16	4	4
430	Northeast	Northeast	Female	73	70 and over	Married	Buddhist	Non-govt. employee	1700	1000 and over	Lower education (below bachelor)	Good	1	Yes	4	4	3	4	15	1	3.75	1	1	1	1	1	1	0	1	1	0	1	1	10	0.833333	1	4	4	4	4	16	4	4	4	4	4	16	4	3
431	Northeast	Northeast	Male	64	60-69	Married	Buddhist	Non-govt. employee	6000	1000 and over	Lower education (below bachelor)	Neutral	0	No	3	4	4	4	15	1	3.75	1	1	0	1	1	1	1	1	1	1	1	1	11	0.916667	1	4	4	3	3	14	3.5	3	3	4	4	14	3.5	4
432	Northeast	Northeast	Male	71	70 and over	Married	Buddhist	Non-govt. employee	600	Less than 1000	Lower education (below bachelor)	Bad	0	No	3	3	3	3	12	0	3	1	1	1	1	1	1	0	0	1	0	0	1	8	0.666667	0	3	4	3	3	13	3.25	3	3	3	3	12	3	4
433	Northeast	Northeast	Male	74	70 and over	Married	Buddhist	Non-govt. employee	21000	1000 and over	Lower education (below bachelor)	Bad	1	Yes	3	4	4	4	15	1	3.75	1	1	1	1	1	1	1	1	1	0	1	1	11	0.916667	1	4	4	4	4	16	4	4	3	3	2	12	3	4
434	Northeast	Northeast	Female	84	70 and over	Married	Buddhist	Unemployed	800	Less than 1000	Lower education (below bachelor)	Good	1	Yes	3	3	3	4	13	0	3.25	1	1	1	1	1	1	1	0	0	1	1	1	10	0.833333	1	4	4	4	4	16	4	3	4	3	4	14	3.5	4
435	Northeast	Northeast	Male	74	70 and over	Married	Buddhist	Non-govt. employee	21000	1000 and over	Lower education (below bachelor)	Bad	1	Yes	4	4	4	4	16	1	4	1	1	1	1	1	1	1	1	1	0	1	1	11	0.916667	1	4	4	4	4	16	4	3	3	3	3	12	3	4
436	Northeast	Northeast	Female	77	70 and over	Married	Buddhist	Unemployed	700	Less than 1000	Lower education (below bachelor)	Bad	2	Yes	4	4	4	4	16	1	4	1	1	1	1	1	1	1	1	1	0	1	1	11	0.916667	1	4	4	3	3	14	3.5	4	4	4	4	16	4	4
437	Northeast	Northeast	Female	75	70 and over	Divorced	Buddhist	Unemployed	1600	1000 and over	Lower education (below bachelor)	Neutral	1	Yes	3	3	3	3	12	0	3	1	0	0	1	1	1	1	0	1	1	1	1	9	0.75	0	4	4	3	3	14	3.5	3	3	4	4	14	3.5	3
438	Northeast	Northeast	Female	63	60-69	Married	Buddhist	Non-govt. employee	600	Less than 1000	Lower education (below bachelor)	Neutral	2	Yes	3	4	4	3	14	1	3.5	1	1	1	1	1	1	0	1	1	1	1	1	11	0.916667	1	3	4	4	3	14	3.5	4	3	3	4	14	3.5	4
439	Northeast	Northeast	Female	64	60-69	Divorced	Buddhist	Non-govt. employee	3000	1000 and over	Lower education (below bachelor)	Neutral	0	No	3	4	3	3	13	0	3.25	1	1	1	1	0	1	1	0	1	0	1	1	9	0.75	0	3	4	3	3	13	3.25	4	4	4	4	16	4	3
440	Northeast	Northeast	Female	60	60-69	Married	Buddhist	Non-govt. employee	2000	1000 and over	Lower education (below bachelor)	Neutral	0	No	3	3	3	4	13	0	3.25	1	1	1	1	1	1	1	1	1	0	1	1	11	0.916667	1	4	4	4	3	15	3.75	4	4	4	4	16	4	3
441	Northeast	Northeast	Female	61	60-69	Married	Buddhist	Non-govt. employee	3600	1000 and over	Lower education (below bachelor)	Neutral	0	No	3	3	3	4	13	0	3.25	1	1	1	1	1	1	0	1	1	0	1	1	10	0.833333	1	4	4	4	4	16	4	4	4	4	4	16	4	4
442	Northeast	Northeast	Female	64	60-69	Married	Buddhist	Non-govt. employee	8900	1000 and over	Lower education (below bachelor)	Good	1	Yes	4	3	3	3	13	0	3.25	1	1	1	1	1	1	1	0	1	1	1	1	11	0.916667	1	4	4	3	3	14	3.5	4	3	3	3	13	3.25	4
443	Northeast	Northeast	Female	78	70 and over	Divorced	Buddhist	Non-govt. employee	700	Less than 1000	Lower education (below bachelor)	Bad	1	Yes	4	4	4	3	15	1	3.75	1	1	1	1	1	1	1	1	1	1	1	0	11	0.916667	1	4	4	3	4	15	3.75	3	4	4	3	14	3.5	4
444	Northeast	Northeast	Female	60	60-69	Married	Buddhist	Non-govt. employee	3000	1000 and over	Lower education (below bachelor)	Good	2	Yes	4	4	3	3	14	1	3.5	1	1	1	1	1	1	1	1	1	0	1	1	11	0.916667	1	4	4	4	4	16	4	4	4	4	4	16	4	4
445	Northeast	Northeast	Female	66	60-69	Divorced	Islam	Non-govt. employee	600	Less than 1000	Lower education (below bachelor)	Good	2	Yes	4	4	3	4	15	1	3.75	1	0	1	1	1	1	1	1	1	0	1	1	10	0.833333	1	4	4	4	4	16	4	4	3	3	4	14	3.5	4
446	Northeast	Northeast	Female	65	60-69	Married	Buddhist	Non-govt. employee	600	Less than 1000	Lower education (below bachelor)	Good	0	No	3	4	3	3	13	0	3.25	1	1	0	1	0	1	0	1	1	0	1	1	8	0.666667	0	4	4	4	4	16	4	4	2	4	3	13	3.25	4
447	Northeast	Northeast	Female	66	60-69	Married	Buddhist	Non-govt. employee	600	Less than 1000	Lower education (below bachelor)	Bad	1	Yes	3	4	3	4	14	1	3.5	1	1	1	1	1	1	1	1	1	1	1	1	12	1	1	4	3	3	4	14	3.5	3	2	3	4	12	3	4
448	Northeast	Northeast	Female	73	70 and over	Married	Buddhist	Unemployed	700	Less than 1000	Lower education (below bachelor)	Bad	0	No	3	4	3	4	14	1	3.5	1	1	0	1	1	1	1	1	1	1	1	1	11	0.916667	1	4	4	4	3	15	3.75	4	4	4	4	16	4	4
449	Northeast	Northeast	Female	60	60-69	Married	Buddhist	Non-govt. employee	2000	1000 and over	Uneducated	Good	0	No	3	3	3	3	12	0	3	1	1	0	0	1	1	0	1	1	0	1	1	8	0.666667	0	4	4	4	4	16	4	4	4	4	4	16	4	4
450	Northeast	Northeast	Female	60	60-69	Married	Buddhist	Non-govt. employee	3600	1000 and over	Lower education (below bachelor)	Bad	0	No	3	3	3	3	12	0	3	1	1	0	0	1	0	1	1	1	1	0	0	7	0.583333	0	4	4	3	3	14	3.5	4	2	3	4	13	3.25	4
451	Northeast	Northeast	Female	61	60-69	Divorced	Buddhist	Non-govt. employee	600	Less than 1000	Lower education (below bachelor)	Good	0	No	3	4	4	3	14	1	3.5	1	1	0	1	0	1	0	1	1	1	0	0	7	0.583333	0	4	4	4	4	16	4	4	3	4	4	15	3.75	4
452	Northeast	Northeast	Female	71	70 and over	Married	Buddhist	Non-govt. employee	700	Less than 1000	Lower education (below bachelor)	Good	1	Yes	3	4	4	4	15	1	3.75	1	1	0	1	0	0	0	1	1	0	1	1	7	0.583333	0	4	3	4	3	14	3.5	3	3	4	4	14	3.5	4
453	Northeast	Northeast	Female	75	70 and over	Divorced	Buddhist	Non-govt. employee	6000	1000 and over	Lower education (below bachelor)	Good	1	Yes	3	4	3	3	13	0	3.25	1	1	1	1	0	1	0	1	1	1	1	1	10	0.833333	1	4	4	3	3	14	3.5	4	4	4	4	16	4	4
454	Northeast	Northeast	Female	71	70 and over	Divorced	Buddhist	Non-govt. employee	2000	1000 and over	Lower education (below bachelor)	Good	1	Yes	3	3	3	3	12	0	3	1	1	1	1	1	1	0	1	1	1	1	0	10	0.833333	1	4	3	3	3	13	3.25	4	2	4	3	13	3.25	4
455	Northeast	Northeast	Female	74	70 and over	Divorced	Buddhist	Non-govt. employee	2700	1000 and over	Lower education (below bachelor)	Bad	0	No	3	3	3	4	13	0	3.25	1	1	1	0	1	1	0	0	1	1	1	0	8	0.666667	0	4	4	4	3	15	3.75	4	4	4	4	16	4	4
456	Northeast	Northeast	Female	74	70 and over	Single	Buddhist	Unemployed	1000	1000 and over	Lower education (below bachelor)	Very good	1	Yes	3	4	3	4	14	1	3.5	1	1	1	1	0	1	1	1	1	1	1	0	10	0.833333	1	4	4	3	4	15	3.75	4	3	3	4	14	3.5	4
457	Northeast	Northeast	Male	75	70 and over	Married	Buddhist	Unemployed	700	Less than 1000	Lower education (below bachelor)	Neutral	0	No	3	4	3	3	13	0	3.25	1	1	1	1	0	1	1	1	1	1	0	0	9	0.75	0	4	4	4	3	15	3.75	4	3	4	3	14	3.5	4
458	Northeast	Northeast	Female	64	60-69	Married	Buddhist	Unemployed	600	Less than 1000	Lower education (below bachelor)	Bad	1	Yes	3	4	4	4	15	1	3.75	1	1	1	1	1	1	0	1	1	0	1	1	10	0.833333	1	4	4	4	3	15	3.75	4	4	4	4	16	4	4
459	Northeast	Northeast	Male	66	60-69	Married	Buddhist	Non-govt. employee	1000	1000 and over	Lower education (below bachelor)	Good	2	Yes	4	3	3	4	14	1	3.5	1	1	1	1	0	1	1	1	1	0	0	1	9	0.75	0	4	4	4	4	16	4	4	3	3	4	14	3.5	4
460	Northeast	Northeast	Female	64	60-69	Married	Buddhist	Non-govt. employee	600	Less than 1000	Lower education (below bachelor)	Bad	1	Yes	4	4	4	4	16	1	4	1	1	0	1	1	1	1	1	1	1	1	0	10	0.833333	1	4	4	4	4	16	4	4	3	4	4	15	3.75	4
461	Northeast	Northeast	Male	61	60-69	Married	Buddhist	Non-govt. employee	2000	1000 and over	Lower education (below bachelor)	Neutral	3	Yes	4	3	4	4	15	1	3.75	1	1	1	1	1	1	0	1	1	1	1	1	11	0.916667	1	4	4	4	4	16	4	3	3	4	4	14	3.5	4
462	Northeast	Northeast	Female	64	60-69	Married	Buddhist	Unemployed	4000	1000 and over	Lower education (below bachelor)	Neutral	3	Yes	4	4	4	4	16	1	4	1	1	1	1	1	0	1	1	1	1	1	0	10	0.833333	1	4	4	4	4	16	4	4	3	4	4	15	3.75	4
463	Northeast	Northeast	Female	64	60-69	Married	Buddhist	Non-govt. employee	50000	1000 and over	Lower education (below bachelor)	Very good	2	Yes	4	4	4	3	15	1	3.75	1	1	1	1	1	1	1	1	1	0	1	1	11	0.916667	1	4	4	4	4	16	4	4	4	4	4	16	4	4
464	Northeast	Northeast	Male	67	60-69	Married	Buddhist	Non-govt. employee	200000	1000 and over	Lower education (below bachelor)	Good	1	Yes	3	3	3	3	12	0	3	1	1	1	1	1	0	1	0	1	1	1	1	10	0.833333	1	4	4	3	4	15	3.75	4	4	4	4	16	4	4
465	Northeast	Northeast	Female	64	60-69	Married	Buddhist	Non-govt. employee	5000	1000 and over	Lower education (below bachelor)	Neutral	1	Yes	3	4	3	4	14	1	3.5	1	1	0	1	1	1	1	1	1	1	1	1	11	0.916667	1	4	4	3	3	14	3.5	4	4	3	3	14	3.5	4
466	Northeast	Northeast	Female	68	60-69	Divorced	Buddhist	Non-govt. employee	1500	1000 and over	Lower education (below bachelor)	Good	1	Yes	3	3	3	3	12	0	3	1	1	0	1	1	1	1	0	1	1	1	1	10	0.833333	1	4	4	3	4	15	3.75	4	4	4	4	16	4	4
467	Northeast	Northeast	Female	72	70 and over	Married	Buddhist	Unemployed	3000	1000 and over	Lower education (below bachelor)	Very good	3	Yes	3	3	3	3	12	0	3	1	1	1	1	1	1	0	1	1	1	1	1	11	0.916667	1	4	4	4	4	16	4	4	4	4	4	16	4	4
468	Northeast	Northeast	Male	69	60-69	Married	Buddhist	Non-govt. employee	5000	1000 and over	Lower education (below bachelor)	Neutral	1	Yes	3	4	3	4	14	1	3.5	1	1	0	1	0	1	1	0	1	0	1	0	7	0.583333	0	4	4	3	4	15	3.75	3	2	4	4	13	3.25	4
469	Northeast	Northeast	Female	67	60-69	Married	Buddhist	Non-govt. employee	600	Less than 1000	Lower education (below bachelor)	Neutral	2	Yes	2	4	3	3	12	0	3	1	1	1	1	1	0	1	1	1	1	1	0	10	0.833333	1	4	4	4	4	16	4	3	4	4	4	15	3.75	4
470	Northeast	Northeast	Female	72	70 and over	Divorced	Buddhist	Non-govt. employee	3000	1000 and over	Lower education (below bachelor)	Neutral	0	No	3	3	3	3	12	0	3	1	0	0	1	0	1	0	1	0	1	1	1	7	0.583333	0	4	4	4	4	16	4	4	4	4	4	16	4	3
471	Northeast	Northeast	Female	65	60-69	Married	Buddhist	Non-govt. employee	2000	1000 and over	Lower education (below bachelor)	Good	1	Yes	3	3	3	3	12	0	3	1	1	1	1	0	0	0	1	1	1	1	1	9	0.75	0	4	4	3	3	14	3.5	2	3	3	4	12	3	4
472	Northeast	Northeast	Male	67	60-69	Married	Buddhist	Non-govt. employee	2000	1000 and over	Lower education (below bachelor)	Bad	0	No	2	4	3	3	12	0	3	1	1	1	1	1	0	0	1	0	0	0	1	7	0.583333	0	4	4	4	3	15	3.75	4	4	4	3	15	3.75	4
473	Northeast	Northeast	Male	75	70 and over	Divorced	Buddhist	Unemployed	1500	1000 and over	Lower education (below bachelor)	Very good	2	Yes	3	3	3	3	12	0	3	1	1	1	1	1	1	0	0	1	0	1	1	9	0.75	0	4	4	3	4	15	3.75	4	3	3	4	14	3.5	3
474	Northeast	Northeast	Male	68	60-69	Married	Buddhist	Govt. employee	15000	1000 and over	Bachelor	Neutral	0	No	3	4	4	4	15	1	3.75	1	1	1	1	0	0	1	1	1	0	1	1	9	0.75	0	4	4	3	3	14	3.5	4	4	4	3	15	3.75	4
475	Northeast	Northeast	Female	71	70 and over	Married	Buddhist	Non-govt. employee	2000	1000 and over	Lower education (below bachelor)	Bad	0	No	3	4	3	3	13	0	3.25	1	0	1	1	1	1	1	0	1	0	1	1	9	0.75	0	4	4	4	4	16	4	4	4	4	4	16	4	4
476	Northeast	Northeast	Male	61	60-69	Married	Buddhist	Non-govt. employee	2500	1000 and over	Lower education (below bachelor)	Neutral	0	No	3	3	2	3	11	0	2.75	1	1	1	1	1	0	0	1	1	1	1	1	10	0.833333	1	3	4	3	3	13	3.25	4	4	4	4	16	4	3
477	Northeast	Northeast	Female	72	70 and over	Married	Buddhist	Non-govt. employee	1000	1000 and over	Lower education (below bachelor)	Neutral	0	No	3	4	3	3	13	0	3.25	1	1	1	1	0	1	1	0	1	1	1	1	10	0.833333	1	4	4	4	3	15	3.75	4	4	4	4	16	4	4
478	Northeast	Northeast	Female	75	70 and over	Married	Buddhist	Non-govt. employee	2000	1000 and over	Lower education (below bachelor)	Very good	1	Yes	3	3	3	3	12	0	3	1	1	1	1	0	1	0	1	1	1	1	1	10	0.833333	1	4	4	4	4	16	4	4	3	3	3	13	3.25	4
479	Northeast	Northeast	Male	70	70 and over	Married	Buddhist	Non-govt. employee	7000	1000 and over	Lower education (below bachelor)	Very good	1	Yes	3	3	3	3	12	0	3	1	1	1	1	1	1	1	0	0	0	0	1	8	0.666667	0	4	4	4	4	16	4	4	4	3	3	14	3.5	4
480	Northeast	Northeast	Female	68	60-69	Divorced	Buddhist	Unemployed	600	Less than 1000	Lower education (below bachelor)	Very good	3	Yes	4	4	4	4	16	1	4	1	0	0	1	1	1	0	0	0	1	1	1	7	0.583333	0	4	4	4	4	16	4	4	4	4	4	16	4	4
481	Northeast	Northeast	Male	70	70 and over	Married	Buddhist	Unemployed	2000	1000 and over	Lower education (below bachelor)	Neutral	0	No	3	2	2	4	11	0	2.75	1	0	0	1	1	0	0	1	1	0	1	1	7	0.583333	0	4	4	4	4	16	4	4	4	4	4	16	4	4
482	Northeast	Northeast	Male	75	70 and over	Married	Buddhist	Unemployed	3000	1000 and over	Lower education (below bachelor)	Very good	1	Yes	4	3	2	4	13	0	3.25	0	1	0	1	1	1	0	1	1	0	1	1	8	0.666667	0	4	4	4	4	16	4	4	4	4	4	16	4	4
483	Northeast	Northeast	Female	85	70 and over	Married	Buddhist	Unemployed	2000	1000 and over	Lower education (below bachelor)	Good	1	Yes	3	3	3	3	12	0	3	1	1	0	1	0	0	1	1	1	1	1	1	9	0.75	0	4	4	4	4	16	4	4	4	4	4	16	4	4
484	Northeast	Northeast	Female	79	70 and over	Married	Buddhist	Unemployed	700	Less than 1000	Lower education (below bachelor)	Neutral	1	Yes	4	4	3	3	14	1	3.5	1	1	1	1	1	1	0	0	1	0	1	1	9	0.75	0	4	4	4	4	16	4	4	4	4	4	16	4	4
485	Northeast	Northeast	Male	75	70 and over	Married	Buddhist	Unemployed	1000	1000 and over	Lower education (below bachelor)	Good	2	Yes	4	2	3	3	12	0	3	1	1	1	1	1	1	1	0	0	1	1	0	9	0.75	0	3	3	3	4	13	3.25	3	3	3	3	12	3	4
486	Northeast	Northeast	Male	70	70 and over	Married	Buddhist	Non-govt. employee	15000	1000 and over	Lower education (below bachelor)	Bad	2	Yes	3	4	2	4	13	0	3.25	1	1	1	1	1	1	0	0	1	1	1	1	10	0.833333	1	3	3	3	4	13	3.25	4	3	3	3	13	3.25	4
487	Northeast	Northeast	Male	60	60-69	Single	Buddhist	Unemployed	600	Less than 1000	Lower education (below bachelor)	Neutral	1	Yes	3	4	3	4	14	1	3.5	1	1	1	1	1	1	1	1	1	0	1	1	11	0.916667	1	3	3	3	4	13	3.25	3	3	4	4	14	3.5	4
488	Northeast	Northeast	Female	75	70 and over	Married	Buddhist	Unemployed	800	Less than 1000	Uneducated	Neutral	1	Yes	4	2	2	3	11	0	2.75	1	1	1	1	1	1	0	0	0	1	1	0	8	0.666667	0	3	3	3	4	13	3.25	2	2	3	3	10	2.5	4
489	Northeast	Northeast	Female	73	70 and over	Married	Buddhist	Unemployed	700	Less than 1000	Lower education (below bachelor)	Bad	1	Yes	3	3	3	3	12	0	3	1	1	1	1	1	1	1	0	0	1	1	0	9	0.75	0	3	3	3	3	12	3	4	2	4	4	14	3.5	4
490	Northeast	Northeast	Female	65	60-69	Married	Buddhist	Unemployed	600	Less than 1000	Lower education (below bachelor)	Bad	2	Yes	3	4	4	4	15	1	3.75	1	1	0	1	1	1	1	1	1	0	1	1	10	0.833333	1	4	4	4	4	16	4	3	3	4	4	14	3.5	4
491	Northeast	Northeast	Male	67	60-69	Married	Buddhist	Unemployed	600	Less than 1000	Lower education (below bachelor)	Neutral	0	No	3	3	3	3	12	0	3	1	1	0	1	1	1	1	0	1	1	1	0	9	0.75	0	4	4	4	4	16	4	4	2	4	4	14	3.5	4
492	Northeast	Northeast	Female	72	70 and over	Married	Buddhist	Unemployed	700	Less than 1000	Lower education (below bachelor)	Neutral	2	Yes	3	3	2	3	11	0	2.75	1	1	1	1	1	0	1	1	0	1	1	0	9	0.75	0	4	4	4	4	16	4	3	3	3	3	12	3	4
493	Northeast	Northeast	Male	70	70 and over	Married	Buddhist	Unemployed	700	Less than 1000	Lower education (below bachelor)	Neutral	0	No	3	3	3	3	12	0	3	1	0	1	0	0	1	0	1	1	1	1	1	8	0.666667	0	4	4	4	4	16	4	3	4	3	4	14	3.5	4
494	Northeast	Northeast	Male	70	70 and over	Married	Buddhist	Unemployed	700	Less than 1000	Lower education (below bachelor)	Neutral	0	No	3	3	3	3	12	0	3	1	0	1	0	0	1	1	1	1	0	1	1	8	0.666667	0	4	4	4	4	16	4	4	3	4	4	15	3.75	4
495	Northeast	Northeast	Female	73	70 and over	Married	Buddhist	Unemployed	2000	1000 and over	Lower education (below bachelor)	Good	1	Yes	3	3	3	3	12	0	3	1	1	1	1	0	0	1	1	1	0	1	0	8	0.666667	0	4	4	3	3	14	3.5	4	2	4	4	14	3.5	4
496	Northeast	Northeast	Female	74	70 and over	Divorced	Buddhist	Unemployed	700	Less than 1000	Lower education (below bachelor)	Good	1	Yes	3	3	3	3	12	0	3	1	1	1	1	1	1	1	1	1	1	1	1	12	1	1	4	4	4	4	16	4	4	4	4	3	15	3.75	4
497	Northeast	Northeast	Female	63	60-69	Divorced	Buddhist	Unemployed	600	Less than 1000	Lower education (below bachelor)	Good	2	Yes	3	4	3	3	13	0	3.25	1	1	1	1	1	1	1	1	1	0	1	1	11	0.916667	1	4	4	4	4	16	4	4	3	3	4	14	3.5	4
498	Northeast	Northeast	Female	64	60-69	Divorced	Buddhist	Unemployed	3000	1000 and over	Lower education (below bachelor)	Good	2	Yes	3	4	3	3	13	0	3.25	1	1	1	1	1	0	1	1	1	1	1	1	11	0.916667	1	4	4	4	4	16	4	3	3	4	4	14	3.5	4
499	Northeast	Northeast	Female	65	60-69	Divorced	Christian	Unemployed	600	Less than 1000	Lower education (below bachelor)	Good	1	Yes	3	3	2	3	11	0	2.75	1	1	1	1	1	1	1	1	1	1	0	1	11	0.916667	1	3	4	4	4	15	3.75	3	3	4	4	14	3.5	4
500	Northeast	Northeast	Female	65	60-69	Married	Buddhist	Unemployed	600	Less than 1000	Lower education (below bachelor)	Good	1	Yes	3	3	3	3	12	0	3	1	1	1	1	1	1	0	0	0	0	0	1	7	0.583333	0	4	4	4	4	16	4	4	4	4	3	15	3.75	4
501	Northeast	Northeast	Female	75	70 and over	Divorced	Buddhist	Unemployed	700	Less than 1000	Lower education (below bachelor)	Good	1	Yes	4	2	2	3	11	0	2.75	1	1	0	1	0	0	0	1	1	1	1	1	8	0.666667	0	4	4	4	4	16	4	4	3	4	3	14	3.5	4
502	Northeast	Northeast	Male	75	70 and over	Divorced	Buddhist	Non-govt. employee	700	Less than 1000	Lower education (below bachelor)	Neutral	0	No	3	3	3	4	13	0	3.25	1	1	1	1	1	1	1	1	1	1	0	1	11	0.916667	1	4	4	4	4	16	4	3	3	4	4	14	3.5	4
503	Northeast	Northeast	Female	75	70 and over	Married	Buddhist	Non-govt. employee	700	Less than 1000	Lower education (below bachelor)	Good	1	Yes	3	4	4	4	15	1	3.75	1	1	1	1	1	1	1	1	1	0	1	1	11	0.916667	1	4	4	4	4	16	4	4	4	3	3	14	3.5	3
504	Northeast	Northeast	Female	60	60-69	Married	Buddhist	Non-govt. employee	3000	1000 and over	Lower education (below bachelor)	Very good	3	Yes	3	4	3	4	14	1	3.5	1	1	0	1	0	0	1	1	1	0	1	1	8	0.666667	0	4	4	4	4	16	4	4	4	4	4	16	4	4
505	Northeast	Northeast	Female	70	70 and over	Divorced	Buddhist	Non-govt. employee	2500	1000 and over	Lower education (below bachelor)	Good	1	Yes	3	4	4	3	14	1	3.5	1	1	1	1	1	0	1	1	1	1	1	1	11	0.916667	1	3	3	4	4	14	3.5	3	4	4	4	15	3.75	4
506	Northeast	Northeast	Female	62	60-69	Married	Buddhist	Non-govt. employee	32000	1000 and over	Bachelor	Good	1	Yes	3	3	3	3	12	0	3	1	1	1	1	1	0	1	1	1	0	1	1	10	0.833333	1	4	4	4	4	16	4	3	4	4	4	15	3.75	4
507	Northeast	Northeast	Female	71	70 and over	Married	Buddhist	Unemployed	700	Less than 1000	Lower education (below bachelor)	Good	2	Yes	4	3	3	3	13	0	3.25	1	1	0	1	1	0	1	0	1	0	1	1	8	0.666667	0	4	4	3	4	15	3.75	4	4	4	4	16	4	4
508	Northeast	Northeast	Male	63	60-69	Married	Buddhist	Non-govt. employee	5000	1000 and over	Lower education (below bachelor)	Neutral	1	Yes	3	3	3	3	12	0	3	1	1	1	1	1	1	1	1	1	0	1	1	11	0.916667	1	4	4	3	3	14	3.5	4	3	4	4	15	3.75	4
509	Northeast	Northeast	Female	67	60-69	Married	Buddhist	Unemployed	3000	1000 and over	Lower education (below bachelor)	Good	1	Yes	3	4	3	3	13	0	3.25	1	1	1	1	1	0	0	1	0	0	1	1	8	0.666667	0	4	4	4	3	15	3.75	3	4	4	4	15	3.75	4
510	Northeast	Northeast	Male	63	60-69	Divorced	Christian	Non-govt. employee	6000	1000 and over	Lower education (below bachelor)	Neutral	1	Yes	3	3	3	3	12	0	3	0	0	1	1	0	0	1	0	1	0	1	1	6	0.5	0	4	4	4	4	16	4	3	3	4	4	14	3.5	4
511	Northeast	Northeast	Male	68	60-69	Divorced	Buddhist	Non-govt. employee	10000	1000 and over	Lower education (below bachelor)	Neutral	0	No	4	4	4	4	16	1	4	1	1	0	1	1	1	0	0	1	0	1	1	8	0.666667	0	4	4	4	3	15	3.75	4	2	4	4	14	3.5	4
512	Northeast	Northeast	Female	76	70 and over	Married	Buddhist	Unemployed	700	Less than 1000	Uneducated	Very good	1	Yes	4	4	3	3	14	1	3.5	1	0	1	1	1	0	0	1	1	1	1	0	8	0.666667	0	3	4	4	4	15	3.75	3	4	4	3	14	3.5	4
513	Northeast	Northeast	Female	62	60-69	Single	Buddhist	Non-govt. employee	2000	1000 and over	Lower education (below bachelor)	Neutral	0	No	4	4	4	4	16	1	4	1	1	1	1	1	1	1	1	0	1	1	1	11	0.916667	1	4	4	4	4	16	4	4	4	4	4	16	4	4
514	Northeast	Northeast	Female	63	60-69	Divorced	Buddhist	Unemployed	5000	1000 and over	Lower education (below bachelor)	Neutral	1	Yes	3	3	3	3	12	0	3	1	1	1	1	1	1	0	0	0	0	1	0	7	0.583333	0	4	4	4	4	16	4	4	4	4	4	16	4	4
515	Northeast	Northeast	Male	62	60-69	Married	Buddhist	Unemployed	2800	1000 and over	Lower education (below bachelor)	Neutral	0	No	3	3	3	3	12	0	3	0	1	0	1	1	1	1	1	1	1	1	1	10	0.833333	1	4	3	3	3	13	3.25	4	4	4	3	15	3.75	3
516	Northeast	Northeast	Female	65	60-69	Single	Buddhist	Unemployed	2000	1000 and over	Lower education (below bachelor)	Good	1	Yes	3	3	3	3	12	0	3	1	1	0	1	1	1	1	0	1	0	1	0	8	0.666667	0	4	4	3	3	14	3.5	4	4	4	4	16	4	4
517	Northeast	Northeast	Male	74	70 and over	Married	Buddhist	Non-govt. employee	1500	1000 and over	Lower education (below bachelor)	Good	0	No	3	2	3	3	11	0	2.75	1	1	0	1	0	1	0	1	1	0	1	0	7	0.583333	0	3	3	3	3	12	3	4	2	3	3	12	3	4
518	Northeast	Northeast	Female	74	70 and over	Married	Buddhist	Non-govt. employee	3000	1000 and over	Lower education (below bachelor)	Good	2	Yes	3	3	2	3	11	0	2.75	0	1	0	1	1	1	0	0	1	0	1	1	7	0.583333	0	4	4	3	3	14	3.5	4	4	4	4	16	4	4
519	Northeast	Northeast	Female	62	60-69	Married	Buddhist	Non-govt. employee	4000	1000 and over	Lower education (below bachelor)	Good	1	Yes	3	2	2	3	10	0	2.5	1	0	1	1	1	1	1	1	1	0	1	1	10	0.833333	1	3	4	3	4	14	3.5	4	4	4	4	16	4	4
520	Northeast	Northeast	Male	65	60-69	Married	Buddhist	Non-govt. employee	5000	1000 and over	Lower education (below bachelor)	Neutral	0	No	3	3	3	3	12	0	3	1	1	0	1	1	1	1	1	1	0	1	1	10	0.833333	1	4	4	3	3	14	3.5	4	3	4	3	14	3.5	4
521	Northeast	Northeast	Female	75	70 and over	Married	Buddhist	Non-govt. employee	800	Less than 1000	Lower education (below bachelor)	Good	2	Yes	3	3	3	3	12	0	3	1	1	1	1	0	1	1	0	1	1	1	1	10	0.833333	1	4	4	4	4	16	4	4	4	4	4	16	4	3
522	Northeast	Northeast	Male	75	70 and over	Married	Buddhist	Unemployed	800	Less than 1000	Lower education (below bachelor)	Good	0	No	3	3	3	3	12	0	3	1	1	1	1	1	1	0	1	1	0	1	1	10	0.833333	1	4	4	4	4	16	4	4	4	4	4	16	4	4
523	Northeast	Northeast	Female	71	70 and over	Married	Buddhist	Non-govt. employee	6000	1000 and over	Lower education (below bachelor)	Neutral	0	No	4	4	4	4	16	1	4	1	1	1	1	1	1	1	1	1	0	1	1	11	0.916667	1	4	4	3	3	14	3.5	4	4	4	4	16	4	4
524	Northeast	Northeast	Male	62	60-69	Married	Buddhist	Non-govt. employee	5000	1000 and over	Lower education (below bachelor)	Neutral	0	No	3	3	3	3	12	0	3	1	0	1	1	1	1	1	1	1	1	1	1	11	0.916667	1	4	4	3	3	14	3.5	4	4	4	4	16	4	4
525	Northeast	Northeast	Male	74	70 and over	Married	Buddhist	Non-govt. employee	700	Less than 1000	Lower education (below bachelor)	Good	2	Yes	4	4	4	3	15	1	3.75	1	1	1	1	1	1	1	1	1	1	1	1	12	1	1	4	4	4	4	16	4	4	4	4	4	16	4	4
526	Northeast	Northeast	Male	67	60-69	Single	Buddhist	Unemployed	600	Less than 1000	Lower education (below bachelor)	Neutral	0	No	3	3	3	3	12	0	3	1	1	0	1	1	0	0	1	1	0	1	1	8	0.666667	0	3	4	3	4	14	3.5	4	4	4	4	16	4	4
527	Northeast	Northeast	Female	69	60-69	Married	Buddhist	Non-govt. employee	6000	1000 and over	Lower education (below bachelor)	Good	1	Yes	4	4	4	4	16	1	4	1	1	1	1	1	1	1	1	1	0	1	1	11	0.916667	1	3	4	4	3	14	3.5	4	3	3	4	14	3.5	4
528	Northeast	Northeast	Female	65	60-69	Divorced	Buddhist	Unemployed	600	Less than 1000	Lower education (below bachelor)	Good	1	Yes	4	3	3	3	13	0	3.25	1	1	1	1	1	1	1	1	1	0	1	1	11	0.916667	1	4	4	4	4	16	4	4	4	4	4	16	4	4
529	Northeast	Northeast	Male	83	70 and over	Married	Buddhist	Unemployed	600	Less than 1000	Lower education (below bachelor)	Very good	1	Yes	4	4	4	3	15	1	3.75	1	1	1	1	1	1	1	1	1	1	1	1	12	1	1	4	4	4	4	16	4	3	3	3	3	12	3	4
530	Northeast	Northeast	Male	72	70 and over	Married	Buddhist	Unemployed	4000	1000 and over	Lower education (below bachelor)	Good	0	No	3	3	4	3	13	0	3.25	1	1	0	1	1	0	1	1	1	1	1	1	10	0.833333	1	4	4	3	4	15	3.75	3	3	4	4	14	3.5	4
531	Northeast	Northeast	Male	62	60-69	Single	Buddhist	Non-govt. employee	5000	1000 and over	Lower education (below bachelor)	Good	2	Yes	3	4	4	3	14	1	3.5	1	1	0	1	1	1	1	0	1	1	1	1	10	0.833333	1	4	4	3	3	14	3.5	4	2	3	3	12	3	4
532	Northeast	Northeast	Female	63	60-69	Married	Buddhist	Non-govt. employee	800	Less than 1000	Lower education (below bachelor)	Neutral	1	Yes	3	4	3	4	14	1	3.5	1	1	1	1	1	1	1	1	1	0	0	1	10	0.833333	1	4	4	4	4	16	4	4	2	3	4	13	3.25	4
533	Northeast	Northeast	Female	61	60-69	Married	Buddhist	Non-govt. employee	20000	1000 and over	Lower education (below bachelor)	Neutral	0	No	3	4	4	4	15	1	3.75	1	1	1	1	1	1	1	1	1	1	0	0	10	0.833333	1	4	4	3	4	15	3.75	4	3	3	4	14	3.5	4
534	Northeast	Northeast	Male	65	60-69	Married	Buddhist	Unemployed	600	Less than 1000	Lower education (below bachelor)	Good	2	Yes	3	3	4	4	14	1	3.5	1	1	0	1	1	1	1	1	1	0	0	1	9	0.75	0	4	4	3	3	14	3.5	4	4	4	4	16	4	4
535	Northeast	Northeast	Female	62	60-69	Married	Buddhist	Unemployed	600	Less than 1000	Lower education (below bachelor)	Good	1	Yes	3	3	3	4	13	0	3.25	1	1	1	1	1	1	1	1	1	1	1	1	12	1	1	4	4	4	4	16	4	4	4	4	3	15	3.75	4
536	East	East	Female	62	60-69	Married	Buddhist	Non-govt. employee	6500	1000 and over	Lower education (below bachelor)	Neutral	2	Yes	3	3	3	3	12	0	3	1	1	1	1	1	1	1	1	0	1	1	0	10	0.833333	1	4	4	4	4	16	4	4	4	4	4	16	4	4
537	East	East	Female	65	60-69	Divorced	Buddhist	Non-govt. employee	4500	1000 and over	Lower education (below bachelor)	Neutral	3	Yes	3	3	3	3	12	0	3	1	1	1	1	1	0	1	1	0	1	1	1	10	0.833333	1	4	4	4	4	16	4	4	4	4	4	16	4	4
538	East	East	Female	60	60-69	Married	Buddhist	Non-govt. employee	5000	1000 and over	Lower education (below bachelor)	Good	3	Yes	4	3	3	3	13	0	3.25	1	1	0	1	1	1	1	1	1	0	1	1	10	0.833333	1	4	4	4	4	16	4	4	4	4	4	16	4	4
539	East	East	Female	66	60-69	Married	Buddhist	Non-govt. employee	3500	1000 and over	Lower education (below bachelor)	Neutral	1	Yes	3	3	2	3	11	0	2.75	1	1	1	1	0	1	1	0	1	1	1	1	10	0.833333	1	4	4	4	4	16	4	4	4	4	4	16	4	4
540	East	East	Female	60	60-69	Married	Buddhist	Non-govt. employee	5000	1000 and over	Lower education (below bachelor)	Neutral	1	Yes	3	3	2	3	11	0	2.75	1	1	1	1	1	1	0	1	0	1	1	1	10	0.833333	1	4	4	4	4	16	4	4	3	4	4	15	3.75	4
541	East	East	Female	62	60-69	Married	Islam	Non-govt. employee	7500	1000 and over	Lower education (below bachelor)	Neutral	2	Yes	3	3	3	3	12	0	3	1	1	1	1	1	0	1	0	1	1	1	1	10	0.833333	1	4	4	4	3	15	3.75	4	2	4	4	14	3.5	4
542	East	East	Male	60	60-69	Married	Buddhist	Non-govt. employee	7000	1000 and over	Lower education (below bachelor)	Neutral	1	Yes	3	3	3	3	12	0	3	1	1	1	1	1	1	0	1	1	1	1	1	11	0.916667	1	4	4	4	3	15	3.75	3	3	3	4	13	3.25	4
543	East	East	Female	65	60-69	Married	Buddhist	Non-govt. employee	5000	1000 and over	Lower education (below bachelor)	Neutral	2	Yes	3	3	3	3	12	0	3	1	0	1	1	1	1	1	1	1	0	1	1	10	0.833333	1	4	3	3	4	14	3.5	4	3	3	3	13	3.25	4
544	East	East	Female	68	60-69	Divorced	Buddhist	Unemployed	1000	1000 and over	Lower education (below bachelor)	Neutral	2	Yes	2	4	4	4	14	1	3.5	1	1	1	1	1	1	1	1	1	0	1	1	11	0.916667	1	4	3	3	3	13	3.25	3	4	4	3	14	3.5	4
545	East	East	Female	61	60-69	Single	Buddhist	Unemployed	600	Less than 1000	Lower education (below bachelor)	Neutral	1	Yes	3	3	3	3	12	0	3	1	1	1	1	1	1	1	0	1	1	1	1	11	0.916667	1	3	4	3	4	14	3.5	3	3	4	4	14	3.5	4
546	East	East	Female	69	60-69	Married	Buddhist	Unemployed	600	Less than 1000	Lower education (below bachelor)	Neutral	1	Yes	3	3	3	3	12	0	3	1	1	1	1	1	1	1	1	1	1	1	1	12	1	1	4	3	3	4	14	3.5	3	3	3	4	13	3.25	4
547	East	East	Male	60	60-69	Single	Buddhist	Non-govt. employee	15000	1000 and over	Lower education (below bachelor)	Good	2	Yes	4	3	3	3	13	0	3.25	1	0	0	1	1	0	0	1	1	1	1	1	8	0.666667	0	3	3	4	4	14	3.5	3	3	4	3	13	3.25	4
548	East	East	Male	62	60-69	Single	Buddhist	Non-govt. employee	15000	1000 and over	Lower education (below bachelor)	Neutral	2	Yes	4	4	3	3	14	1	3.5	1	1	1	1	1	1	1	1	1	0	1	1	11	0.916667	1	3	3	3	3	12	3	4	4	4	4	16	4	4
549	East	East	Male	67	60-69	Single	Buddhist	Unemployed	3000	1000 and over	Lower education (below bachelor)	Bad	3	Yes	4	4	4	3	15	1	3.75	1	0	1	0	1	1	1	1	1	0	1	1	9	0.75	0	4	4	4	4	16	4	4	4	4	4	16	4	4
550	East	East	Female	62	60-69	Single	Buddhist	Unemployed	2500	1000 and over	Lower education (below bachelor)	Good	2	Yes	4	4	3	3	14	1	3.5	1	1	1	1	1	1	1	1	1	1	1	1	12	1	1	4	4	4	4	16	4	3	3	3	3	12	3	4
551	East	East	Female	66	60-69	Divorced	Buddhist	Unemployed	700	Less than 1000	Lower education (below bachelor)	Neutral	4	Yes	2	4	3	3	12	0	3	1	1	0	1	1	0	1	0	1	1	1	1	9	0.75	0	4	4	4	4	16	4	4	3	4	3	14	3.5	4
552	East	East	Female	65	60-69	Divorced	Buddhist	Unemployed	700	Less than 1000	Lower education (below bachelor)	Neutral	2	Yes	4	4	3	3	14	1	3.5	1	1	0	1	1	1	0	0	1	1	1	1	9	0.75	0	4	4	4	4	16	4	4	4	4	4	16	4	4
553	East	East	Female	68	60-69	Divorced	Buddhist	Non-govt. employee	6000	1000 and over	Lower education (below bachelor)	Neutral	1	Yes	4	4	3	3	14	1	3.5	1	1	1	1	1	1	0	0	0	0	0	1	7	0.583333	0	4	4	4	3	15	3.75	4	4	4	4	16	4	4
554	East	East	Female	64	60-69	Divorced	Buddhist	Non-govt. employee	9000	1000 and over	Lower education (below bachelor)	Neutral	1	Yes	4	4	4	3	15	1	3.75	1	1	1	0	1	1	0	1	1	1	0	0	8	0.666667	0	4	4	3	4	15	3.75	4	3	4	4	15	3.75	4
555	East	East	Male	75	70 and over	Single	Buddhist	Unemployed	700	Less than 1000	Lower education (below bachelor)	Bad	4	Yes	4	4	3	3	14	1	3.5	1	1	0	1	1	0	1	1	1	1	1	1	10	0.833333	1	4	4	3	3	14	3.5	4	4	4	4	16	4	4
556	East	East	Male	66	60-69	Divorced	Buddhist	Non-govt. employee	8000	1000 and over	Lower education (below bachelor)	Neutral	0	No	2	4	3	4	13	0	3.25	1	1	1	1	1	1	1	1	1	1	1	1	12	1	1	4	4	3	4	15	3.75	4	3	3	3	13	3.25	4
557	East	East	Female	67	60-69	Divorced	Buddhist	Non-govt. employee	9000	1000 and over	Lower education (below bachelor)	Good	0	No	3	4	4	3	14	1	3.5	1	1	1	1	1	1	1	1	0	0	1	0	9	0.75	0	4	4	4	4	16	4	4	4	4	4	16	4	4
558	East	East	Male	65	60-69	Single	Buddhist	Non-govt. employee	15000	1000 and over	Lower education (below bachelor)	Bad	3	Yes	3	3	3	3	12	0	3	1	1	1	1	1	1	1	1	1	0	1	1	11	0.916667	1	4	3	3	4	14	3.5	4	4	4	4	16	4	4
559	East	East	Female	69	60-69	Single	Buddhist	Unemployed	1500	1000 and over	Lower education (below bachelor)	Neutral	2	Yes	3	3	3	3	12	0	3	1	1	1	1	1	1	1	0	1	1	1	1	11	0.916667	1	4	4	3	4	15	3.75	4	4	4	4	16	4	4
560	East	East	Female	68	60-69	Single	Buddhist	Unemployed	600	Less than 1000	Lower education (below bachelor)	Bad	1	Yes	4	4	3	3	14	1	3.5	1	1	1	1	1	1	1	1	1	1	1	1	12	1	1	4	4	4	4	16	4	4	4	3	4	15	3.75	4
561	East	East	Female	67	60-69	Single	Buddhist	Unemployed	600	Less than 1000	Lower education (below bachelor)	Good	2	Yes	4	4	3	3	14	1	3.5	1	1	0	1	1	0	0	1	1	0	1	1	8	0.666667	0	3	4	3	4	14	3.5	4	4	4	4	16	4	4
562	East	East	Female	72	70 and over	Single	Buddhist	Unemployed	3000	1000 and over	Lower education (below bachelor)	Good	1	Yes	4	4	4	4	16	1	4	1	1	1	1	1	1	1	1	1	0	1	1	11	0.916667	1	4	4	3	3	14	3.5	4	4	4	4	16	4	4
563	East	East	Female	69	60-69	Single	Buddhist	Non-govt. employee	10000	1000 and over	Lower education (below bachelor)	Neutral	2	Yes	4	4	4	4	16	1	4	0	0	1	1	1	1	1	1	1	0	1	1	9	0.75	0	4	4	4	4	16	4	4	4	4	4	16	4	4
564	East	East	Female	64	60-69	Single	Buddhist	Non-govt. employee	600	Less than 1000	Lower education (below bachelor)	Neutral	1	Yes	4	4	4	4	16	1	4	1	1	1	1	1	1	1	1	1	1	1	1	12	1	1	4	3	4	4	15	3.75	4	4	4	3	15	3.75	4
565	East	East	Female	61	60-69	Single	Buddhist	Non-govt. employee	20000	1000 and over	Lower education (below bachelor)	Neutral	1	Yes	4	4	3	3	14	1	3.5	1	1	0	1	1	0	0	0	1	1	1	1	8	0.666667	0	4	4	4	4	16	4	4	4	4	4	16	4	4
566	East	East	Female	71	70 and over	Single	Buddhist	Non-govt. employee	3000	1000 and over	Lower education (below bachelor)	Neutral	1	Yes	4	4	4	3	15	1	3.75	1	1	0	1	1	0	0	0	1	1	1	1	8	0.666667	0	4	3	4	4	15	3.75	4	4	4	3	15	3.75	4
567	East	East	Male	64	60-69	Married	Buddhist	Non-govt. employee	3000	1000 and over	Lower education (below bachelor)	Bad	2	Yes	4	4	3	4	15	1	3.75	1	1	1	1	1	1	1	1	1	1	1	1	12	1	1	4	4	4	4	16	4	4	4	4	4	16	4	4
568	East	East	Male	64	60-69	Single	Buddhist	Non-govt. employee	5000	1000 and over	Lower education (below bachelor)	Bad	1	Yes	4	4	4	4	16	1	4	1	1	1	1	1	1	1	1	1	1	0	1	11	0.916667	1	4	4	3	4	15	3.75	4	4	4	4	16	4	4
569	East	East	Male	68	60-69	Married	Buddhist	Non-govt. employee	6000	1000 and over	Lower education (below bachelor)	Bad	0	No	4	3	4	4	15	1	3.75	1	1	0	1	1	0	1	1	1	1	1	1	10	0.833333	1	4	4	4	4	16	4	4	4	4	3	15	3.75	4
570	East	East	Male	62	60-69	Single	Buddhist	Non-govt. employee	4500	1000 and over	Lower education (below bachelor)	Very good	0	No	4	3	3	4	14	1	3.5	1	1	1	1	1	1	1	1	1	1	1	1	12	1	1	4	4	4	4	16	4	4	4	4	4	16	4	4
571	East	East	Male	60	60-69	Single	Buddhist	Non-govt. employee	10000	1000 and over	Lower education (below bachelor)	Neutral	2	Yes	4	3	3	3	13	0	3.25	1	1	0	1	1	1	1	1	1	1	1	0	10	0.833333	1	4	4	4	4	16	4	4	3	3	4	14	3.5	4
572	East	East	Male	60	60-69	Divorced	Buddhist	Non-govt. employee	8000	1000 and over	Lower education (below bachelor)	Good	1	Yes	2	4	4	4	14	1	3.5	1	1	1	1	1	1	1	1	1	0	1	1	11	0.916667	1	4	4	3	3	14	3.5	3	3	4	4	14	3.5	4
573	East	East	Female	65	60-69	Divorced	Buddhist	Non-govt. employee	7500	1000 and over	Lower education (below bachelor)	Good	2	Yes	3	3	3	3	12	0	3	1	1	1	1	1	1	1	0	1	1	1	1	11	0.916667	1	4	4	3	3	14	3.5	4	4	3	4	15	3.75	4
574	East	East	Female	65	60-69	Divorced	Buddhist	Non-govt. employee	5000	1000 and over	Lower education (below bachelor)	Good	1	Yes	2	4	4	3	13	0	3.25	1	1	1	1	1	1	1	1	1	1	1	1	12	1	1	4	4	4	4	16	4	3	3	3	4	13	3.25	4
575	East	East	Female	70	70 and over	Single	Buddhist	Non-govt. employee	5000	1000 and over	Lower education (below bachelor)	Neutral	1	Yes	3	3	3	3	12	0	3	1	1	0	1	1	0	1	1	1	1	1	1	10	0.833333	1	3	3	3	4	13	3.25	3	3	4	4	14	3.5	4
576	East	East	Female	68	60-69	Married	Buddhist	Unemployed	700	Less than 1000	Lower education (below bachelor)	Neutral	0	No	2	4	4	4	14	1	3.5	1	1	1	1	1	1	1	1	1	0	1	1	11	0.916667	1	4	4	3	3	14	3.5	4	4	4	4	16	4	4
577	East	East	Female	67	60-69	Single	Buddhist	Unemployed	600	Less than 1000	Lower education (below bachelor)	Bad	2	Yes	3	3	3	3	12	0	3	0	0	1	1	1	1	1	1	1	0	1	1	9	0.75	0	4	4	4	4	16	4	3	3	3	3	12	3	4
578	East	East	Male	62	60-69	Married	Buddhist	Non-govt. employee	5000	1000 and over	Lower education (below bachelor)	Bad	0	No	4	4	4	4	16	1	4	1	1	1	1	1	1	1	1	1	1	0	1	11	0.916667	1	4	4	4	4	16	4	4	2	3	3	12	3	4
579	East	East	Female	68	60-69	Single	Buddhist	Non-govt. employee	4500	1000 and over	Lower education (below bachelor)	Neutral	1	Yes	4	3	4	3	14	1	3.5	1	1	1	1	1	0	1	1	1	1	1	1	11	0.916667	1	4	4	3	3	14	3.5	3	3	4	4	14	3.5	4
580	East	East	Male	67	60-69	Divorced	Buddhist	Non-govt. employee	3500	1000 and over	Lower education (below bachelor)	Bad	4	Yes	4	4	4	3	15	1	3.75	1	1	0	1	1	1	0	0	1	1	1	1	9	0.75	0	4	4	4	4	16	4	3	3	3	3	12	3	4
581	East	East	Female	65	60-69	Divorced	Buddhist	Govt. employee	22000	1000 and over	Bachelor	Good	1	Yes	4	4	3	4	15	1	3.75	1	1	1	1	1	1	1	1	1	1	1	1	12	1	1	4	4	4	3	15	3.75	3	2	4	4	13	3.25	3
582	East	East	Male	63	60-69	Single	Buddhist	Non-govt. employee	4000	1000 and over	Lower education (below bachelor)	Good	2	Yes	2	4	4	4	14	1	3.5	1	1	1	1	1	1	1	1	1	1	1	0	11	0.916667	1	4	4	4	4	16	4	3	3	4	4	14	3.5	4
583	East	East	Female	70	70 and over	Single	Buddhist	Non-govt. employee	3500	1000 and over	Lower education (below bachelor)	Good	2	Yes	2	3	4	4	13	0	3.25	1	1	0	1	1	0	1	0	1	1	1	1	9	0.75	0	4	4	3	3	14	3.5	4	4	4	4	16	4	4
584	East	East	Female	67	60-69	Divorced	Buddhist	Unemployed	600	Less than 1000	Uneducated	Neutral	2	Yes	2	3	3	4	12	0	3	1	1	1	1	1	1	1	1	1	1	1	1	12	1	1	4	4	4	3	15	3.75	4	4	4	3	15	3.75	4
585	East	East	Female	68	60-69	Divorced	Buddhist	Unemployed	600	Less than 1000	Lower education (below bachelor)	Neutral	3	Yes	2	3	3	3	11	0	2.75	1	1	1	1	1	1	1	1	0	1	1	0	10	0.833333	1	4	4	4	4	16	4	4	3	4	4	15	3.75	4
586	East	East	Female	68	60-69	Single	Buddhist	Non-govt. employee	7000	1000 and over	Lower education (below bachelor)	Good	2	Yes	3	3	3	3	12	0	3	1	1	1	1	1	1	1	1	1	0	1	1	11	0.916667	1	4	4	3	2	13	3.25	3	4	4	3	14	3.5	4
587	East	East	Female	68	60-69	Single	Buddhist	Non-govt. employee	6000	1000 and over	Lower education (below bachelor)	Good	1	Yes	4	4	4	3	15	1	3.75	1	1	1	1	1	1	1	1	1	1	1	1	12	1	1	4	4	3	3	14	3.5	3	3	4	4	14	3.5	4
588	East	East	Male	71	70 and over	Married	Buddhist	Non-govt. employee	4000	1000 and over	Lower education (below bachelor)	Good	1	Yes	4	4	3	3	14	1	3.5	1	1	1	1	1	1	1	0	1	0	1	1	10	0.833333	1	4	4	4	4	16	4	3	3	4	3	13	3.25	4
589	East	East	Male	63	60-69	Divorced	Buddhist	Govt. employee	20000	1000 and over	Lower education (below bachelor)	Neutral	1	Yes	4	4	3	4	15	1	3.75	1	1	0	1	1	0	0	1	1	0	1	1	8	0.666667	0	3	4	3	4	14	3.5	3	4	4	4	15	3.75	4
590	East	East	Female	68	60-69	Single	Buddhist	Non-govt. employee	4000	1000 and over	Lower education (below bachelor)	Good	2	Yes	4	4	3	3	14	1	3.5	1	1	1	1	1	1	0	0	1	0	1	1	9	0.75	0	4	4	3	3	14	3.5	4	4	4	4	16	4	4
591	East	East	Male	63	60-69	Single	Buddhist	Non-govt. employee	15000	1000 and over	Lower education (below bachelor)	Bad	0	No	4	4	4	4	16	1	4	0	1	1	1	1	1	1	1	1	0	1	1	10	0.833333	1	4	4	4	4	16	4	4	4	4	4	16	4	4
592	East	East	Female	64	60-69	Single	Buddhist	Non-govt. employee	3500	1000 and over	Lower education (below bachelor)	Neutral	2	Yes	4	4	3	3	14	1	3.5	1	1	1	1	1	1	1	1	1	1	1	1	12	1	1	4	4	4	4	16	4	3	2	3	3	11	2.75	4
593	East	East	Female	61	60-69	Divorced	Buddhist	Non-govt. employee	3000	1000 and over	Lower education (below bachelor)	Bad	1	Yes	4	4	3	3	14	1	3.5	1	1	0	1	1	1	1	1	1	1	1	1	11	0.916667	1	4	4	4	4	16	4	4	3	3	4	14	3.5	4
594	East	East	Female	74	70 and over	Single	Buddhist	Non-govt. employee	5000	1000 and over	Lower education (below bachelor)	Neutral	2	Yes	4	4	4	3	15	1	3.75	1	1	0	1	1	0	0	0	1	1	1	1	8	0.666667	0	4	4	4	4	16	4	3	3	3	3	12	3	4
595	East	East	Female	71	70 and over	Single	Buddhist	Non-govt. employee	3000	1000 and over	Lower education (below bachelor)	Good	1	Yes	2	4	3	3	12	0	3	1	1	1	1	1	1	1	1	1	1	1	1	12	1	1	4	4	4	3	15	3.75	4	4	4	4	16	4	4
596	East	East	Female	64	60-69	Single	Buddhist	Non-govt. employee	5000	1000 and over	Lower education (below bachelor)	Good	0	No	2	4	3	4	13	0	3.25	1	1	1	1	1	1	1	1	0	1	0	0	9	0.75	0	4	4	3	4	15	3.75	4	4	4	4	16	4	4
597	East	East	Male	66	60-69	Single	Buddhist	Non-govt. employee	2000	1000 and over	Lower education (below bachelor)	Good	2	Yes	2	4	3	3	12	0	3	1	1	0	1	1	0	1	0	0	1	1	1	8	0.666667	0	4	4	4	3	15	3.75	4	4	4	4	16	4	4
598	East	East	Female	66	60-69	Married	Buddhist	Non-govt. employee	5000	1000 and over	Lower education (below bachelor)	Neutral	2	Yes	4	4	4	3	15	1	3.75	1	1	1	1	1	1	1	1	0	0	0	1	9	0.75	0	4	4	3	3	14	3.5	4	4	4	4	16	4	4
599	East	East	Female	68	60-69	Single	Buddhist	Non-govt. employee	3000	1000 and over	Lower education (below bachelor)	Neutral	3	Yes	3	3	3	3	12	0	3	1	1	1	1	1	1	1	1	0	1	1	0	10	0.833333	1	4	4	4	4	16	4	4	4	4	4	16	4	4
600	East	East	Male	61	60-69	Single	Buddhist	Non-govt. employee	9000	1000 and over	Lower education (below bachelor)	Bad	2	Yes	4	4	4	4	16	1	4	1	1	1	1	1	1	1	1	1	0	1	1	11	0.916667	1	4	4	4	4	16	4	4	4	4	4	16	4	4
601	East	East	Male	73	70 and over	Single	Buddhist	Non-govt. employee	5000	1000 and over	Lower education (below bachelor)	Good	2	Yes	4	4	3	3	14	1	3.5	1	1	1	1	1	1	1	0	1	1	1	1	11	0.916667	1	3	3	4	4	14	3.5	4	4	4	4	16	4	4
602	East	East	Male	61	60-69	Single	Buddhist	Non-govt. employee	9000	1000 and over	Lower education (below bachelor)	Good	2	Yes	4	3	4	3	14	1	3.5	1	1	1	1	1	1	1	1	1	1	1	1	12	1	1	4	4	4	4	16	4	4	4	4	4	16	4	4
603	East	East	Female	68	60-69	Single	Buddhist	Non-govt. employee	6500	1000 and over	Lower education (below bachelor)	Neutral	2	Yes	4	4	3	3	14	1	3.5	1	1	0	1	1	0	0	1	1	0	1	1	8	0.666667	0	4	4	3	3	14	3.5	4	4	4	4	16	4	4
604	East	East	Female	64	60-69	Single	Buddhist	Non-govt. employee	10000	1000 and over	Lower education (below bachelor)	Good	2	Yes	3	4	4	3	14	1	3.5	1	1	1	1	1	1	1	1	1	0	1	1	11	0.916667	1	4	4	4	3	15	3.75	4	4	4	4	16	4	4
605	East	East	Female	70	70 and over	Divorced	Buddhist	Non-govt. employee	3500	1000 and over	Lower education (below bachelor)	Bad	2	Yes	3	3	4	4	14	1	3.5	1	0	1	1	1	1	1	1	1	0	1	1	10	0.833333	1	4	4	4	4	16	4	4	4	4	4	16	4	3
606	East	East	Male	73	70 and over	Single	Buddhist	Unemployed	700	Less than 1000	Uneducated	Good	1	Yes	4	4	4	4	16	1	4	1	1	1	1	1	1	1	1	1	1	1	1	12	1	1	4	4	4	4	16	4	4	4	4	4	16	4	4
607	East	East	Male	70	70 and over	Single	Buddhist	Unemployed	700	Less than 1000	Uneducated	Neutral	2	Yes	4	3	4	3	14	1	3.5	1	1	0	1	1	0	0	0	1	1	1	1	8	0.666667	0	4	4	3	4	15	3.75	4	4	4	4	16	4	4
608	East	East	Female	60	60-69	Single	Buddhist	Non-govt. employee	4000	1000 and over	Lower education (below bachelor)	Good	2	Yes	4	4	4	3	15	1	3.75	1	1	0	1	1	0	0	0	1	1	1	1	8	0.666667	0	4	4	4	4	16	4	4	4	4	3	15	3.75	4
609	East	East	Female	68	60-69	Single	Buddhist	Non-govt. employee	3500	1000 and over	Lower education (below bachelor)	Very good	2	Yes	4	4	3	4	15	1	3.75	1	1	1	1	1	1	0	0	0	0	0	1	7	0.583333	0	4	4	4	4	16	4	3	4	4	4	15	3.75	4
610	East	East	Female	64	60-69	Single	Buddhist	Non-govt. employee	4000	1000 and over	Lower education (below bachelor)	Good	1	Yes	4	4	4	4	16	1	4	1	1	1	1	1	1	1	1	0	1	1	1	11	0.916667	1	4	3	4	4	15	3.75	3	4	4	4	15	3.75	4
611	East	East	Female	63	60-69	Single	Buddhist	Non-govt. employee	5000	1000 and over	Lower education (below bachelor)	Neutral	1	Yes	4	3	4	4	15	1	3.75	1	1	0	1	1	0	1	0	1	1	1	1	9	0.75	0	4	4	3	4	15	3.75	4	3	3	4	14	3.5	4
612	East	East	Female	67	60-69	Single	Buddhist	Non-govt. employee	5000	1000 and over	Lower education (below bachelor)	Neutral	2	Yes	2	3	3	4	12	0	3	1	1	1	1	1	1	1	0	0	0	0	1	8	0.666667	0	4	4	3	3	14	3.5	4	4	4	4	16	4	4
613	East	East	Female	61	60-69	Divorced	Buddhist	Non-govt. employee	4500	1000 and over	Lower education (below bachelor)	Good	1	Yes	2	3	3	3	11	0	2.75	1	1	1	1	1	1	1	1	0	1	1	0	10	0.833333	1	4	4	4	4	16	4	4	4	4	4	16	4	4
614	East	East	Female	63	60-69	Married	Buddhist	Non-govt. employee	6000	1000 and over	Lower education (below bachelor)	Good	2	Yes	2	4	4	4	14	1	3.5	1	1	1	1	1	1	1	1	1	0	1	1	11	0.916667	1	4	4	4	3	15	3.75	3	3	4	4	14	3.5	4
615	East	East	Female	68	60-69	Single	Buddhist	Non-govt. employee	8000	1000 and over	Lower education (below bachelor)	Good	1	Yes	3	3	3	3	12	0	3	1	1	1	1	1	1	1	0	1	1	1	1	11	0.916667	1	4	4	4	3	15	3.75	4	4	4	4	16	4	4
616	East	East	Female	67	60-69	Single	Buddhist	Non-govt. employee	9000	1000 and over	Lower education (below bachelor)	Good	2	Yes	2	4	4	3	13	0	3.25	1	1	1	1	1	1	1	0	1	0	0	0	8	0.666667	0	4	4	4	4	16	4	4	4	4	4	16	4	4
617	East	East	Male	64	60-69	Single	Buddhist	Non-govt. employee	3500	1000 and over	Lower education (below bachelor)	Neutral	1	Yes	3	3	3	3	12	0	3	1	1	0	1	1	0	0	1	1	0	1	1	8	0.666667	0	3	4	3	4	14	3.5	4	4	4	4	16	4	4
618	East	East	Female	61	60-69	Single	Buddhist	Non-govt. employee	4000	1000 and over	Lower education (below bachelor)	Good	1	Yes	2	4	4	4	14	1	3.5	1	1	1	1	1	1	1	1	1	0	1	1	11	0.916667	1	4	4	4	3	15	3.75	4	3	3	4	14	3.5	4
619	East	East	Male	70	70 and over	Single	Buddhist	Unemployed	700	Less than 1000	Lower education (below bachelor)	Bad	1	Yes	3	3	3	3	12	0	3	0	0	1	1	1	1	1	1	1	0	1	1	9	0.75	0	4	4	4	4	16	4	4	4	4	4	16	4	3
620	East	East	Female	71	70 and over	Divorced	Buddhist	Unemployed	700	Less than 1000	Lower education (below bachelor)	Neutral	1	Yes	4	4	4	4	16	1	4	1	1	1	1	1	1	1	0	1	1	1	1	11	0.916667	1	4	4	4	4	16	4	3	3	3	4	13	3.25	4
621	East	East	Female	69	60-69	Divorced	Buddhist	Non-govt. employee	2000	1000 and over	Lower education (below bachelor)	Good	2	Yes	4	3	4	3	14	1	3.5	1	1	0	1	1	0	1	1	1	1	1	1	10	0.833333	1	4	4	4	4	16	4	3	3	3	4	13	3.25	4
622	East	East	Male	64	60-69	Single	Buddhist	Govt. employee	30000	1000 and over	Lower education (below bachelor)	Very good	1	Yes	4	4	4	3	15	1	3.75	1	1	0	1	1	1	1	0	0	1	1	1	9	0.75	0	4	4	4	4	16	4	3	3	3	3	12	3	4
623	East	East	Male	68	60-69	Single	Buddhist	Unemployed	3000	1000 and over	Lower education (below bachelor)	Neutral	1	Yes	4	4	3	4	15	1	3.75	1	1	1	1	1	1	1	1	0	0	0	0	8	0.666667	0	4	4	4	3	15	3.75	3	2	4	3	12	3	4
624	East	East	Male	63	60-69	Single	Buddhist	Non-govt. employee	2500	1000 and over	Lower education (below bachelor)	Bad	2	Yes	4	4	4	4	16	1	4	1	1	1	1	1	1	1	1	0	1	1	1	11	0.916667	1	4	4	4	4	16	4	3	3	4	4	14	3.5	4
625	East	East	Female	65	60-69	Married	Buddhist	Non-govt. employee	3000	1000 and over	Lower education (below bachelor)	Neutral	1	Yes	4	3	4	4	15	1	3.75	1	1	0	1	1	0	1	0	1	1	1	1	9	0.75	0	4	4	4	4	16	4	4	4	4	4	16	4	4
626	East	East	Female	68	60-69	Single	Buddhist	Non-govt. employee	3500	1000 and over	Lower education (below bachelor)	Bad	2	Yes	4	3	3	4	14	1	3.5	1	1	1	1	1	1	1	1	1	1	1	1	12	1	1	4	4	4	4	16	4	4	3	3	3	13	3.25	4
627	East	East	Female	69	60-69	Single	Buddhist	Non-govt. employee	4000	1000 and over	Lower education (below bachelor)	Neutral	2	Yes	4	3	3	3	13	0	3.25	1	1	1	1	1	1	1	1	0	1	1	0	10	0.833333	1	4	4	4	4	16	4	4	3	4	4	15	3.75	4
628	East	East	Male	68	60-69	Single	Buddhist	Non-govt. employee	3000	1000 and over	Lower education (below bachelor)	Neutral	1	Yes	2	4	4	4	14	1	3.5	1	1	1	1	1	1	1	1	1	0	1	1	11	0.916667	1	4	4	4	4	16	4	3	3	4	4	14	3.5	3
629	East	East	Male	60	60-69	Single	Buddhist	Non-govt. employee	2500	1000 and over	Lower education (below bachelor)	Neutral	1	Yes	3	3	3	3	12	0	3	1	1	1	1	1	1	1	0	1	1	1	1	11	0.916667	1	4	4	4	4	16	4	3	4	4	4	15	3.75	4
630	East	East	Female	62	60-69	Single	Buddhist	Non-govt. employee	5000	1000 and over	Lower education (below bachelor)	Good	3	Yes	2	4	4	3	13	0	3.25	1	1	1	1	1	1	1	1	1	1	1	1	12	1	1	4	3	4	4	15	3.75	3	3	3	4	13	3.25	4
631	East	East	Female	64	60-69	Single	Buddhist	Non-govt. employee	3500	1000 and over	Lower education (below bachelor)	Good	1	Yes	3	3	3	3	12	0	3	1	1	0	1	1	0	1	1	1	0	1	1	9	0.75	0	3	4	3	4	14	3.5	4	3	3	3	13	3.25	4
632	East	East	Male	60	60-69	Single	Buddhist	Non-govt. employee	5000	1000 and over	Lower education (below bachelor)	Very good	1	Yes	2	4	4	4	14	1	3.5	1	1	1	1	1	1	1	1	1	0	1	1	11	0.916667	1	3	4	4	3	14	3.5	4	4	4	4	16	4	4
633	East	East	Female	61	60-69	Single	Buddhist	Non-govt. employee	4500	1000 and over	Lower education (below bachelor)	Good	3	Yes	3	3	3	3	12	0	3	1	0	1	1	1	1	1	1	1	0	1	1	10	0.833333	1	4	4	4	4	16	4	4	4	4	4	16	4	4
634	East	East	Male	63	60-69	Single	Buddhist	Govt. employee	25000	1000 and over	Lower education (below bachelor)	Neutral	3	Yes	4	4	4	4	16	1	4	1	1	1	1	1	1	1	1	1	1	1	1	12	1	1	4	3	4	4	15	3.75	2	2	3	3	10	2.5	4
635	East	East	Female	62	60-69	Single	Buddhist	Non-govt. employee	3500	1000 and over	Lower education (below bachelor)	Good	3	Yes	4	3	4	3	14	1	3.5	1	1	0	1	1	1	0	1	1	1	1	1	10	0.833333	1	4	4	3	4	15	3.75	4	4	4	4	16	4	4
636	East	East	Female	60	60-69	Single	Buddhist	Non-govt. employee	6500	1000 and over	Lower education (below bachelor)	Good	3	Yes	4	4	4	3	15	1	3.75	1	1	0	1	1	0	0	0	1	1	1	1	8	0.666667	0	4	3	4	4	15	3.75	4	4	3	3	14	3.5	4
637	East	East	Female	63	60-69	Single	Buddhist	Non-govt. employee	6500	1000 and over	Lower education (below bachelor)	Good	1	Yes	4	4	3	4	15	1	3.75	1	1	1	1	1	1	1	1	1	1	1	1	12	1	1	4	4	4	3	15	3.75	4	4	4	4	16	4	4
638	East	East	Male	69	60-69	Single	Buddhist	Unemployed	2500	1000 and over	Lower education (below bachelor)	Good	1	Yes	3	4	4	4	15	1	3.75	1	1	1	1	1	1	1	1	1	1	1	0	11	0.916667	1	4	4	3	4	15	3.75	4	4	4	4	16	4	4
639	East	East	Female	71	70 and over	Single	Buddhist	Non-govt. employee	6000	1000 and over	Lower education (below bachelor)	Good	1	Yes	3	3	4	4	14	1	3.5	1	1	0	1	1	0	1	0	1	1	1	1	9	0.75	0	4	4	3	3	14	3.5	4	4	4	4	16	4	4
640	East	East	Female	65	60-69	Single	Buddhist	Non-govt. employee	5500	1000 and over	Lower education (below bachelor)	Good	1	Yes	3	3	3	4	13	0	3.25	1	1	1	1	1	1	1	1	1	1	1	1	12	1	1	4	4	3	4	15	3.75	4	4	4	4	16	4	4
641	East	East	Female	68	60-69	Single	Buddhist	Non-govt. employee	6000	1000 and over	Lower education (below bachelor)	Good	3	Yes	3	3	3	3	12	0	3	1	1	1	1	1	1	1	1	0	1	1	0	10	0.833333	1	4	4	4	4	16	4	4	4	4	4	16	4	4
642	East	East	Female	61	60-69	Single	Buddhist	Non-govt. employee	9000	1000 and over	Lower education (below bachelor)	Good	2	Yes	3	4	4	4	15	1	3.75	1	1	1	1	1	1	1	1	1	0	1	1	11	0.916667	1	4	3	4	3	14	3.5	4	4	4	4	16	4	4
643	East	East	Female	64	60-69	Single	Buddhist	Non-govt. employee	6500	1000 and over	Lower education (below bachelor)	Neutral	2	Yes	3	3	3	3	12	0	3	1	1	1	1	1	1	1	0	1	1	1	1	11	0.916667	1	4	4	4	3	15	3.75	3	3	4	4	14	3.5	4
644	East	East	Female	67	60-69	Single	Buddhist	Non-govt. employee	5500	1000 and over	Lower education (below bachelor)	Good	2	Yes	2	4	4	3	13	0	3.25	1	1	1	1	1	1	1	1	1	1	1	1	12	1	1	4	3	4	3	14	3.5	3	4	3	4	14	3.5	4
645	East	East	Female	60	60-69	Single	Buddhist	Non-govt. employee	4500	1000 and over	Lower education (below bachelor)	Good	1	Yes	3	3	3	3	12	0	3	1	1	0	1	1	0	0	1	1	0	1	1	8	0.666667	0	3	4	4	3	14	3.5	4	3	4	4	15	3.75	4
646	East	East	Female	67	60-69	Single	Buddhist	Non-govt. employee	5000	1000 and over	Lower education (below bachelor)	Neutral	2	Yes	2	4	4	4	14	1	3.5	1	1	1	1	1	1	1	1	1	0	1	1	11	0.916667	1	4	4	4	3	15	3.75	4	4	4	4	16	4	4
647	East	East	Female	60	60-69	Single	Buddhist	Non-govt. employee	6000	1000 and over	Lower education (below bachelor)	Good	1	Yes	3	3	3	3	12	0	3	0	1	1	1	1	1	1	1	1	0	1	1	10	0.833333	1	4	4	4	4	16	4	4	4	4	4	16	4	4
648	East	East	Female	64	60-69	Single	Buddhist	Non-govt. employee	7000	1000 and over	Lower education (below bachelor)	Neutral	1	Yes	4	4	4	4	16	1	4	1	1	1	1	1	1	1	1	1	1	1	1	12	1	1	4	3	4	4	15	3.75	3	4	3	4	14	3.5	4
649	East	East	Female	61	60-69	Single	Buddhist	Non-govt. employee	9000	1000 and over	Lower education (below bachelor)	Neutral	3	Yes	4	3	4	3	14	1	3.5	1	1	1	1	1	1	0	0	1	1	1	1	10	0.833333	1	4	4	3	4	15	3.75	3	4	4	4	15	3.75	4
650	East	East	Female	65	60-69	Single	Buddhist	Non-govt. employee	9000	1000 and over	Lower education (below bachelor)	Good	1	Yes	4	4	4	3	15	1	3.75	1	1	0	1	1	1	1	1	1	1	1	1	11	0.916667	1	4	3	3	4	14	3.5	3	4	3	3	13	3.25	4
651	East	East	Female	67	60-69	Divorced	Buddhist	Non-govt. employee	55000	1000 and over	Lower education (below bachelor)	Good	3	Yes	4	4	3	4	15	1	3.75	1	1	1	1	1	1	1	1	1	1	1	1	12	1	1	4	4	4	4	16	4	3	4	4	4	15	3.75	4
652	East	East	Male	68	60-69	Single	Buddhist	Non-govt. employee	4000	1000 and over	Lower education (below bachelor)	Good	2	Yes	3	4	4	4	15	1	3.75	1	1	1	1	1	1	1	1	1	1	1	0	11	0.916667	1	4	4	3	3	14	3.5	3	4	4	4	15	3.75	4
653	East	East	Female	60	60-69	Single	Buddhist	Non-govt. employee	7000	1000 and over	Lower education (below bachelor)	Good	1	Yes	3	3	4	4	14	1	3.5	1	1	0	1	1	0	1	0	1	1	1	1	9	0.75	0	4	4	3	3	14	3.5	4	4	4	4	16	4	4
654	East	East	Female	64	60-69	Single	Buddhist	Non-govt. employee	5000	1000 and over	Lower education (below bachelor)	Neutral	1	Yes	3	3	3	4	13	0	3.25	1	1	1	1	1	1	1	1	1	1	1	0	11	0.916667	1	4	4	3	3	14	3.5	3	3	4	3	13	3.25	4
655	East	East	Male	62	60-69	Single	Buddhist	Non-govt. employee	6000	1000 and over	Lower education (below bachelor)	Good	1	Yes	3	3	3	3	12	0	3	1	1	1	1	1	1	1	1	0	1	0	0	9	0.75	0	4	4	4	4	16	4	4	3	4	4	15	3.75	4
656	East	East	Female	67	60-69	Single	Buddhist	Non-govt. employee	7000	1000 and over	Lower education (below bachelor)	Good	1	Yes	3	4	4	4	15	1	3.75	1	1	1	1	1	1	1	1	1	0	1	1	11	0.916667	1	4	3	3	3	13	3.25	3	3	4	4	14	3.5	4
657	East	East	Male	62	60-69	Single	Buddhist	Non-govt. employee	7000	1000 and over	Lower education (below bachelor)	Good	3	Yes	3	3	3	3	12	0	3	1	1	1	1	1	0	1	0	1	0	1	0	8	0.666667	0	4	4	3	3	14	3.5	4	3	3	4	14	3.5	4
658	East	East	Female	65	60-69	Divorced	Buddhist	Non-govt. employee	4000	1000 and over	Lower education (below bachelor)	Neutral	2	Yes	2	4	4	3	13	0	3.25	1	1	1	1	1	1	1	1	1	1	1	1	12	1	1	4	3	4	4	15	3.75	4	3	3	3	13	3.25	4
659	East	East	Female	66	60-69	Single	Buddhist	Non-govt. employee	6500	1000 and over	Lower education (below bachelor)	Neutral	2	Yes	3	3	3	3	12	0	3	1	1	0	1	1	0	1	1	1	0	1	1	9	0.75	0	3	4	3	4	14	3.5	4	3	4	4	15	3.75	4
660	East	East	Female	65	60-69	Single	Buddhist	Non-govt. employee	9000	1000 and over	Lower education (below bachelor)	Good	1	Yes	2	4	4	4	14	1	3.5	1	1	1	1	1	1	1	1	1	0	1	1	11	0.916667	1	4	4	4	4	16	4	4	4	4	4	16	4	4
661	East	East	Female	63	60-69	Divorced	Buddhist	Non-govt. employee	5500	1000 and over	Lower education (below bachelor)	Neutral	1	Yes	3	3	3	3	12	0	3	0	1	0	1	1	0	1	1	1	0	1	1	8	0.666667	0	4	4	4	4	16	4	4	4	4	4	16	4	4
662	East	East	Male	65	60-69	Single	Buddhist	Govt. employee	34000	1000 and over	Higher education (above bachelor)	Good	3	Yes	4	4	4	4	16	1	4	1	1	1	1	1	1	1	1	1	1	1	1	12	1	1	4	3	4	4	15	3.75	3	4	3	4	14	3.5	4
663	East	East	Male	60	60-69	Single	Buddhist	Non-govt. employee	6000	1000 and over	Lower education (below bachelor)	Good	2	Yes	4	3	4	3	14	1	3.5	1	1	0	1	1	1	1	1	1	1	1	1	11	0.916667	1	4	4	3	4	15	3.75	3	4	4	4	15	3.75	4
664	East	East	Female	62	60-69	Single	Buddhist	Non-govt. employee	12000	1000 and over	Lower education (below bachelor)	Good	1	Yes	4	4	4	3	15	1	3.75	1	1	0	1	1	1	1	0	1	1	1	1	10	0.833333	1	4	3	4	4	15	3.75	3	4	3	3	13	3.25	4
665	East	East	Female	63	60-69	Single	Buddhist	Non-govt. employee	7000	1000 and over	Lower education (below bachelor)	Good	0	No	4	4	3	4	15	1	3.75	1	1	1	1	1	1	1	0	1	1	0	1	10	0.833333	1	4	4	4	3	15	3.75	3	4	4	4	15	3.75	3
666	East	East	Male	65	60-69	Single	Buddhist	Non-govt. employee	6000	1000 and over	Lower education (below bachelor)	Good	3	Yes	3	4	4	4	15	1	3.75	1	1	1	1	1	1	1	1	1	1	1	0	11	0.916667	1	4	4	3	4	15	3.75	4	4	4	4	16	4	4
667	East	East	Female	61	60-69	Single	Buddhist	Non-govt. employee	9000	1000 and over	Lower education (below bachelor)	Good	1	Yes	3	3	4	4	14	1	3.5	1	1	0	1	1	0	1	0	1	1	1	1	9	0.75	0	4	4	3	3	14	3.5	4	4	4	4	16	4	3
668	East	East	Female	63	60-69	Divorced	Buddhist	Non-govt. employee	5000	1000 and over	Lower education (below bachelor)	Neutral	3	Yes	3	3	3	4	13	0	3.25	1	1	1	1	1	1	1	1	1	1	1	1	12	1	1	4	4	3	3	14	3.5	4	3	4	3	14	3.5	4
669	East	East	Male	66	60-69	Single	Buddhist	Non-govt. employee	6000	1000 and over	Lower education (below bachelor)	Good	1	Yes	3	3	3	3	12	0	3	1	1	1	1	1	1	1	1	0	1	1	0	10	0.833333	1	4	4	4	4	16	4	4	3	4	4	15	3.75	4
670	East	East	Female	65	60-69	Single	Buddhist	Non-govt. employee	3500	1000 and over	Lower education (below bachelor)	Neutral	1	Yes	3	4	4	4	15	1	3.75	1	1	1	1	1	1	1	1	1	0	1	1	11	0.916667	1	4	3	3	4	14	3.5	4	3	4	3	14	3.5	4
671	East	East	Female	65	60-69	Divorced	Buddhist	Non-govt. employee	6000	1000 and over	Lower education (below bachelor)	Good	2	Yes	3	3	3	3	12	0	3	1	1	1	1	1	1	0	0	1	1	1	1	10	0.833333	1	4	4	3	4	15	3.75	3	4	4	3	14	3.5	4
672	East	East	Female	60	60-69	Single	Buddhist	Non-govt. employee	5000	1000 and over	Lower education (below bachelor)	Good	1	Yes	3	4	4	3	14	1	3.5	1	1	1	1	1	1	0	1	1	1	1	1	11	0.916667	1	4	3	4	4	15	3.75	3	3	3	4	13	3.25	4
673	East	East	Female	61	60-69	Single	Buddhist	Non-govt. employee	6500	1000 and over	Lower education (below bachelor)	Good	1	Yes	3	3	3	3	12	0	3	1	1	0	1	1	0	1	1	1	0	1	1	9	0.75	0	4	4	3	4	15	3.75	4	3	4	3	14	3.5	4
674	East	East	Female	63	60-69	Single	Buddhist	Non-govt. employee	4000	1000 and over	Lower education (below bachelor)	Good	1	Yes	3	4	4	4	15	1	3.75	1	1	1	1	1	1	1	1	1	0	1	1	11	0.916667	1	3	4	4	4	15	3.75	4	4	4	4	16	4	4
675	East	East	Female	68	60-69	Single	Buddhist	Non-govt. employee	4500	1000 and over	Lower education (below bachelor)	Good	1	Yes	3	3	3	3	12	0	3	1	1	1	1	1	1	1	1	1	0	1	1	11	0.916667	1	4	4	4	4	16	4	4	4	4	4	16	4	4
676	East	East	Female	62	60-69	Single	Buddhist	Non-govt. employee	5500	1000 and over	Lower education (below bachelor)	Good	2	Yes	4	4	4	4	16	1	4	1	1	1	1	1	1	1	1	1	1	1	1	12	1	1	4	3	4	4	15	3.75	3	3	3	3	12	3	4
677	East	East	Female	68	60-69	Single	Buddhist	Non-govt. employee	4000	1000 and over	Lower education (below bachelor)	Good	2	Yes	4	3	4	3	14	1	3.5	1	1	0	1	1	0	0	1	1	1	1	1	9	0.75	0	4	4	3	4	15	3.75	3	3	4	4	14	3.5	4
678	East	East	Male	62	60-69	Single	Buddhist	Non-govt. employee	5000	1000 and over	Lower education (below bachelor)	Neutral	3	Yes	4	4	4	3	15	1	3.75	1	1	0	1	1	1	1	0	1	1	1	1	10	0.833333	1	4	3	3	4	14	3.5	3	3	3	3	12	3	4
679	East	East	Female	62	60-69	Single	Buddhist	Non-govt. employee	4506	1000 and over	Lower education (below bachelor)	Good	2	Yes	4	4	3	4	15	1	3.75	1	1	1	1	1	1	1	1	1	1	0	0	10	0.833333	1	4	4	4	4	16	4	3	3	4	4	14	3.5	4
680	East	East	Female	65	60-69	Single	Buddhist	Non-govt. employee	6000	1000 and over	Lower education (below bachelor)	Bad	2	Yes	3	4	4	4	15	1	3.75	1	1	1	1	1	1	1	1	1	1	1	0	11	0.916667	1	4	4	3	4	15	3.75	4	4	3	4	15	3.75	4
681	East	East	Male	65	60-69	Single	Buddhist	Non-govt. employee	5000	1000 and over	Lower education (below bachelor)	Neutral	3	Yes	3	3	4	4	14	1	3.5	1	1	0	1	1	0	1	0	1	1	1	1	9	0.75	0	4	4	3	3	14	3.5	4	3	4	4	15	3.75	4
682	East	East	Male	61	60-69	Single	Buddhist	Non-govt. employee	4500	1000 and over	Lower education (below bachelor)	Good	1	Yes	3	3	3	4	13	0	3.25	1	1	1	1	1	1	1	1	1	1	1	1	12	1	1	4	4	3	4	15	3.75	3	4	3	4	14	3.5	4
683	East	East	Female	66	60-69	Single	Buddhist	Non-govt. employee	6500	1000 and over	Lower education (below bachelor)	Good	2	Yes	3	3	3	3	12	0	3	1	1	1	1	1	1	1	1	0	1	1	0	10	0.833333	1	4	4	4	4	16	4	4	3	4	4	15	3.75	4
684	East	East	Male	69	60-69	Single	Buddhist	Unemployed	600	Less than 1000	Lower education (below bachelor)	Neutral	1	Yes	3	4	4	4	15	1	3.75	1	1	1	1	1	1	1	1	1	0	1	1	11	0.916667	1	4	3	3	4	14	3.5	3	3	4	4	14	3.5	3
685	East	East	Female	62	60-69	Single	Buddhist	Non-govt. employee	3500	1000 and over	Lower education (below bachelor)	Good	4	Yes	3	3	3	3	12	0	3	1	1	1	1	1	1	1	0	1	1	1	1	11	0.916667	1	4	4	3	4	15	3.75	3	4	4	3	14	3.5	4
686	East	East	Male	66	60-69	Single	Buddhist	Non-govt. employee	15000	1000 and over	Lower education (below bachelor)	Neutral	1	Yes	2	4	4	3	13	0	3.25	1	1	1	1	1	1	1	1	1	1	1	1	12	1	1	4	3	3	4	14	3.5	3	4	3	4	14	3.5	4
687	East	East	Female	63	60-69	Single	Buddhist	Non-govt. employee	2500	1000 and over	Lower education (below bachelor)	Bad	1	Yes	3	3	3	3	12	0	3	1	1	0	1	1	0	0	1	1	0	1	1	8	0.666667	0	3	4	3	4	14	3.5	4	3	4	4	15	3.75	4
688	East	East	Female	60	60-69	Single	Buddhist	Non-govt. employee	3000	1000 and over	Lower education (below bachelor)	Neutral	2	Yes	2	4	4	4	14	1	3.5	1	1	1	1	1	1	1	1	1	0	1	1	11	0.916667	1	3	4	4	3	14	3.5	4	4	4	4	16	4	4
689	East	East	Male	63	60-69	Single	Buddhist	Non-govt. employee	15000	1000 and over	Lower education (below bachelor)	Neutral	1	Yes	3	3	3	3	12	0	3	1	1	1	1	1	1	1	1	1	0	0	1	10	0.833333	1	4	4	4	4	16	4	4	4	4	4	16	4	4
690	East	East	Female	61	60-69	Married	Buddhist	Non-govt. employee	1400	1000 and over	Lower education (below bachelor)	Bad	2	Yes	2	4	4	4	14	1	3.5	1	1	1	1	1	1	1	1	1	1	0	1	11	0.916667	1	4	4	4	4	16	4	2	2	3	3	10	2.5	4
691	East	East	Female	65	60-69	Divorced	Buddhist	Non-govt. employee	3000	1000 and over	Lower education (below bachelor)	Bad	1	Yes	2	3	4	3	12	0	3	1	1	0	1	1	0	1	1	1	1	1	1	10	0.833333	1	4	4	4	4	16	4	3	2	3	4	12	3	4
692	East	East	Female	60	60-69	Single	Buddhist	Non-govt. employee	2000	1000 and over	Lower education (below bachelor)	Bad	1	Yes	3	3	3	3	12	0	3	1	1	1	1	1	1	0	0	1	1	1	1	10	0.833333	1	4	3	4	4	15	3.75	3	3	3	3	12	3	4
693	East	East	Male	62	60-69	Single	Buddhist	Non-govt. employee	75000	1000 and over	Lower education (below bachelor)	Good	1	Yes	3	3	3	3	12	0	3	1	1	1	0	1	1	0	1	1	0	1	1	9	0.75	0	4	4	4	3	15	3.75	3	2	4	4	13	3.25	4
694	East	East	Male	62	60-69	Single	Buddhist	Non-govt. employee	10000	1000 and over	Lower education (below bachelor)	Neutral	1	Yes	3	3	3	3	12	0	3	1	1	1	0	1	0	1	0	0	0	0	0	5	0.416667	0	4	4	3	3	14	3.5	3	3	3	4	13	3.25	4
695	East	East	Female	70	70 and over	Single	Buddhist	Unemployed	1500	1000 and over	Lower education (below bachelor)	Neutral	1	Yes	4	4	3	3	14	1	3.5	1	1	1	1	0	1	0	1	1	1	0	0	8	0.666667	0	4	4	3	3	14	3.5	4	4	4	4	16	4	4
696	East	East	Female	75	70 and over	Single	Buddhist	Non-govt. employee	4000	1000 and over	Lower education (below bachelor)	Neutral	1	Yes	4	3	3	3	13	0	3.25	1	1	0	1	1	1	1	1	1	0	1	1	10	0.833333	1	4	4	3	3	14	3.5	3	3	4	3	13	3.25	4
697	East	East	Female	67	60-69	Single	Buddhist	Non-govt. employee	3000	1000 and over	Lower education (below bachelor)	Neutral	2	Yes	4	3	3	3	13	0	3.25	1	1	1	1	0	1	0	1	1	1	1	1	10	0.833333	1	4	4	4	4	16	4	4	3	4	4	15	3.75	4
698	East	East	Female	60	60-69	Divorced	Buddhist	Non-govt. employee	5000	1000 and over	Lower education (below bachelor)	Neutral	2	Yes	4	4	3	3	14	1	3.5	1	1	1	1	1	1	0	1	1	1	1	0	10	0.833333	1	4	3	3	3	13	3.25	4	3	4	4	15	3.75	4
699	East	East	Female	62	60-69	Married	Buddhist	Non-govt. employee	6000	1000 and over	Lower education (below bachelor)	Bad	4	Yes	3	4	3	3	13	0	3.25	1	1	0	0	1	1	0	0	0	0	0	0	4	0.333333	0	4	4	3	3	14	3.5	4	3	4	4	15	3.75	4
700	East	East	Female	60	60-69	Single	Buddhist	Non-govt. employee	5000	1000 and over	Lower education (below bachelor)	Good	1	Yes	3	4	3	4	14	1	3.5	1	1	1	1	0	1	1	0	1	1	1	0	9	0.75	0	4	3	4	4	15	3.75	4	2	3	4	13	3.25	4
701	East	East	Female	66	60-69	Single	Buddhist	Non-govt. employee	5000	1000 and over	Lower education (below bachelor)	Good	1	Yes	3	3	3	3	12	0	3	1	1	0	1	0	1	0	1	1	1	0	0	7	0.583333	0	3	3	3	3	12	3	2	2	2	2	8	2	4
702	East	East	Female	60	60-69	Single	Buddhist	Non-govt. employee	10000	1000 and over	Lower education (below bachelor)	Neutral	1	Yes	3	3	3	3	12	0	3	1	1	1	0	1	1	0	0	0	0	1	1	7	0.583333	0	3	4	4	3	14	3.5	4	4	4	4	16	4	4
703	East	East	Female	66	60-69	Divorced	Buddhist	Non-govt. employee	5000	1000 and over	Lower education (below bachelor)	Neutral	1	Yes	3	4	3	3	13	0	3.25	1	0	1	1	1	1	1	1	0	0	1	1	9	0.75	0	4	4	4	4	16	4	4	4	4	4	16	4	4
704	East	East	Female	66	60-69	Single	Buddhist	Non-govt. employee	4000	1000 and over	Lower education (below bachelor)	Neutral	0	No	3	4	3	3	13	0	3.25	1	1	0	1	1	1	0	0	0	0	0	1	6	0.5	0	4	4	4	4	16	4	4	3	3	3	13	3.25	4
705	East	East	Female	62	60-69	Married	Buddhist	Non-govt. employee	8000	1000 and over	Lower education (below bachelor)	Good	0	No	4	4	3	3	14	1	3.5	1	1	0	1	0	1	1	1	1	1	1	1	10	0.833333	1	4	4	4	4	16	4	4	3	4	4	15	3.75	4
706	East	East	Female	61	60-69	Single	Buddhist	Non-govt. employee	2000	1000 and over	Lower education (below bachelor)	Good	0	No	4	4	3	3	14	1	3.5	1	0	1	1	1	0	1	1	1	1	0	0	8	0.666667	0	4	4	4	4	16	4	2	3	3	3	11	2.75	4
707	East	East	Female	60	60-69	Single	Buddhist	Non-govt. employee	8000	1000 and over	Lower education (below bachelor)	Neutral	1	Yes	4	4	3	4	15	1	3.75	1	1	1	1	1	1	0	0	1	0	0	1	8	0.666667	0	4	4	4	4	16	4	2	3	4	4	13	3.25	4
708	East	East	Female	65	60-69	Divorced	Buddhist	Non-govt. employee	3000	1000 and over	Lower education (below bachelor)	Neutral	1	Yes	4	4	4	4	16	1	4	1	1	1	1	1	0	1	1	1	1	1	1	11	0.916667	1	4	4	4	4	16	4	4	4	4	4	16	4	4
709	East	East	Male	60	60-69	Single	Buddhist	Govt. employee	30000	1000 and over	Lower education (below bachelor)	Neutral	1	Yes	3	3	4	4	14	1	3.5	1	1	0	1	1	0	1	0	1	1	1	1	9	0.75	0	4	4	4	4	16	4	4	3	4	4	15	3.75	4
710	East	East	Male	68	60-69	Divorced	Buddhist	Non-govt. employee	3000	1000 and over	Lower education (below bachelor)	Bad	1	Yes	3	3	3	4	13	0	3.25	1	1	1	1	1	1	1	1	1	1	1	1	12	1	1	4	4	4	3	15	3.75	3	3	4	4	14	3.5	4
711	East	East	Male	62	60-69	Married	Buddhist	Non-govt. employee	10000	1000 and over	Lower education (below bachelor)	Good	1	Yes	3	3	3	3	12	0	3	1	1	1	1	1	1	1	1	0	1	1	0	10	0.833333	1	2	2	2	2	8	2	1	1	1	1	4	1	4
712	East	East	Female	60	60-69	Single	Buddhist	Non-govt. employee	4000	1000 and over	Lower education (below bachelor)	Neutral	0	No	3	4	4	4	15	1	3.75	1	1	1	1	1	1	1	1	1	0	1	1	11	0.916667	1	4	4	4	4	16	4	4	4	4	4	16	4	4
713	East	East	Female	64	60-69	Married	Buddhist	Non-govt. employee	5000	1000 and over	Lower education (below bachelor)	Good	2	Yes	3	3	3	3	12	0	3	1	1	1	1	1	1	1	0	1	1	1	1	11	0.916667	1	4	4	4	3	15	3.75	3	3	4	4	14	3.5	4
714	East	East	Male	64	60-69	Single	Buddhist	Non-govt. employee	8000	1000 and over	Lower education (below bachelor)	Good	4	Yes	3	4	4	3	14	1	3.5	1	1	1	1	1	1	1	1	1	1	1	1	12	1	1	4	3	3	4	14	3.5	3	4	3	4	14	3.5	4
715	East	East	Female	70	70 and over	Divorced	Buddhist	Unemployed	2000	1000 and over	Lower education (below bachelor)	Good	2	Yes	3	3	3	3	12	0	3	1	1	0	1	1	0	0	1	1	0	1	1	8	0.666667	0	3	3	3	3	12	3	4	4	4	4	16	4	4
716	East	East	Female	74	70 and over	Divorced	Buddhist	Unemployed	700	Less than 1000	Lower education (below bachelor)	Neutral	4	Yes	3	4	4	4	15	1	3.75	1	1	1	1	1	1	1	1	1	0	1	1	11	0.916667	1	4	4	4	3	15	3.75	4	4	4	4	16	4	4
717	East	East	Female	70	70 and over	Divorced	Buddhist	Unemployed	700	Less than 1000	Lower education (below bachelor)	Neutral	4	Yes	3	3	3	3	12	0	3	0	0	1	1	1	1	1	1	1	0	1	1	9	0.75	0	4	4	4	4	16	4	4	4	4	4	16	4	4
718	East	East	Female	67	60-69	Divorced	Buddhist	Unemployed	1500	1000 and over	Lower education (below bachelor)	Neutral	4	Yes	3	4	4	4	15	1	3.75	1	1	1	1	1	1	1	1	1	1	0	1	11	0.916667	1	3	3	4	4	14	3.5	4	4	4	4	16	4	4
719	East	East	Male	61	60-69	Single	Buddhist	Non-govt. employee	10000	1000 and over	Lower education (below bachelor)	Good	3	Yes	3	3	4	3	13	0	3.25	1	1	0	1	1	0	0	1	1	1	1	1	9	0.75	0	4	4	3	4	15	3.75	4	4	4	4	16	4	4
720	East	East	Male	60	60-69	Divorced	Buddhist	Non-govt. employee	3600	1000 and over	Lower education (below bachelor)	Neutral	2	Yes	3	4	4	3	14	1	3.5	1	1	0	1	1	0	0	0	1	1	1	1	8	0.666667	0	4	3	3	4	14	3.5	4	4	4	4	16	4	4
721	East	East	Male	61	60-69	Single	Buddhist	Non-govt. employee	9000	1000 and over	Lower education (below bachelor)	Good	1	Yes	3	3	3	3	12	0	3	1	1	1	1	1	1	1	1	1	1	1	1	12	1	1	4	4	4	3	15	3.75	3	4	4	4	15	3.75	3
722	East	East	Male	68	60-69	Single	Buddhist	Non-govt. employee	5000	1000 and over	Lower education (below bachelor)	Neutral	4	Yes	3	3	3	3	12	0	3	1	0	1	0	1	1	1	1	1	1	1	0	9	0.75	0	4	4	4	3	15	3.75	4	4	4	4	16	4	4
723	East	East	Female	73	70 and over	Divorced	Buddhist	Unemployed	700	Less than 1000	Lower education (below bachelor)	Neutral	2	Yes	3	3	3	3	12	0	3	1	1	1	1	0	0	1	0	1	1	1	0	8	0.666667	0	4	4	3	4	15	3.75	4	4	4	4	16	4	4
724	East	East	Female	60	60-69	Single	Buddhist	Non-govt. employee	3000	1000 and over	Lower education (below bachelor)	Good	1	Yes	4	4	3	3	14	1	3.5	1	1	1	1	1	1	1	1	1	1	1	1	12	1	1	4	4	3	3	14	3.5	4	4	4	4	16	4	4
725	East	East	Female	70	70 and over	Divorced	Buddhist	Non-govt. employee	2500	1000 and over	Lower education (below bachelor)	Bad	3	Yes	4	3	3	3	13	0	3.25	1	1	0	1	1	1	0	1	1	0	1	1	9	0.75	0	4	4	4	4	16	4	4	3	4	4	15	3.75	4
726	East	East	Female	61	60-69	Single	Buddhist	Non-govt. employee	2600	1000 and over	Lower education (below bachelor)	Neutral	1	Yes	4	3	3	3	13	0	3.25	1	1	1	0	1	0	1	0	0	0	0	0	5	0.416667	0	4	4	3	3	14	3.5	3	4	3	4	14	3.5	3
727	East	East	Female	68	60-69	Divorced	Buddhist	Non-govt. employee	2000	1000 and over	Lower education (below bachelor)	Bad	2	Yes	4	4	3	3	14	1	3.5	1	1	1	1	0	1	0	1	1	1	0	0	8	0.666667	0	4	4	4	3	15	3.75	3	3	4	4	14	3.5	4
728	East	East	Female	70	70 and over	Divorced	Buddhist	Non-govt. employee	3500	1000 and over	Lower education (below bachelor)	Good	2	Yes	3	4	3	3	13	0	3.25	1	1	1	1	1	0	1	1	1	0	1	1	10	0.833333	1	4	3	3	4	14	3.5	4	3	3	3	13	3.25	4
729	East	East	Female	69	60-69	Divorced	Buddhist	Non-govt. employee	3500	1000 and over	Lower education (below bachelor)	Bad	4	Yes	3	4	3	4	14	1	3.5	1	1	1	1	0	1	1	1	1	1	1	1	11	0.916667	1	3	3	4	4	14	3.5	3	3	4	4	14	3.5	4
730	East	East	Male	68	60-69	Single	Buddhist	Unemployed	2500	1000 and over	Lower education (below bachelor)	Neutral	2	Yes	3	3	3	3	12	0	3	1	1	1	1	1	1	1	1	1	1	1	0	11	0.916667	1	3	4	4	4	15	3.75	4	4	4	4	16	4	4
731	East	East	Female	64	60-69	Single	Buddhist	Non-govt. employee	9000	1000 and over	Lower education (below bachelor)	Good	1	Yes	3	3	3	3	12	0	3	1	1	0	0	1	1	1	0	0	0	0	0	5	0.416667	0	4	4	4	4	16	4	4	4	4	4	16	4	4
732	East	East	Female	73	70 and over	Divorced	Buddhist	Non-govt. employee	5000	1000 and over	Lower education (below bachelor)	Neutral	1	Yes	3	4	3	3	13	0	3.25	1	1	1	1	0	1	1	0	1	1	1	0	9	0.75	0	3	4	4	4	15	3.75	4	3	3	3	13	3.25	4
733	East	East	Female	60	60-69	Single	Buddhist	Non-govt. employee	5000	1000 and over	Lower education (below bachelor)	Good	4	Yes	3	4	3	3	13	0	3.25	1	1	0	1	0	1	1	1	1	1	0	0	8	0.666667	0	4	4	3	4	15	3.75	3	3	4	4	14	3.5	4
734	East	East	Female	60	60-69	Single	Buddhist	Non-govt. employee	6000	1000 and over	Lower education (below bachelor)	Neutral	3	Yes	4	4	3	3	14	1	3.5	1	1	1	0	1	1	0	0	0	0	1	1	7	0.583333	0	4	3	4	4	15	3.75	3	3	3	3	12	3	3
735	East	East	Male	62	60-69	Single	Buddhist	Non-govt. employee	10000	1000 and over	Lower education (below bachelor)	Good	4	Yes	4	4	3	3	14	1	3.5	1	1	1	1	0	1	1	1	0	0	1	1	9	0.75	0	4	4	4	4	16	4	4	3	3	4	14	3.5	4
736	East	East	Female	60	60-69	Single	Buddhist	Govt. employee	18000	1000 and over	Lower education (below bachelor)	Good	1	Yes	4	4	4	4	16	1	4	1	1	1	1	1	1	0	1	1	1	1	1	11	0.916667	1	4	4	3	4	15	3.75	4	4	3	3	14	3.5	4
737	East	East	Female	63	60-69	Married	Buddhist	Non-govt. employee	5500	1000 and over	Lower education (below bachelor)	Good	4	Yes	4	3	4	4	15	1	3.75	1	1	1	1	0	1	0	1	1	1	1	1	10	0.833333	1	4	4	4	3	15	3.75	4	4	4	4	16	4	3
738	East	East	Female	69	60-69	Single	Buddhist	Non-govt. employee	9000	1000 and over	Lower education (below bachelor)	Neutral	1	Yes	3	3	3	4	13	0	3.25	1	0	1	1	1	0	1	0	1	1	1	0	8	0.666667	0	4	4	4	4	16	4	4	3	3	4	14	3.5	4
739	East	East	Female	60	60-69	Single	Buddhist	Non-govt. employee	5500	1000 and over	Lower education (below bachelor)	Neutral	4	Yes	3	3	3	3	12	0	3	1	1	1	1	1	1	0	0	1	0	0	1	8	0.666667	0	4	4	4	4	16	4	4	3	4	4	15	3.75	4
740	South	South	Female	62	60-69	Married	Buddhist	Non-govt. employee	9000	1000 and over	Lower education (below bachelor)	Good	3	Yes	3	4	3	4	14	1	3.5	1	1	1	1	1	1	1	1	1	1	1	1	12	1	1	4	4	4	4	16	4	4	4	4	4	16	4	4
741	South	South	Male	64	60-69	Single	Buddhist	Non-govt. employee	9000	1000 and over	Lower education (below bachelor)	Good	0	No	3	4	3	4	14	1	3.5	1	1	1	1	1	1	0	1	1	1	1	1	11	0.916667	1	4	4	4	3	15	3.75	4	4	4	4	16	4	4
742	South	South	Female	71	70 and over	Single	Buddhist	Unemployed	1200	1000 and over	Lower education (below bachelor)	Good	2	Yes	3	3	3	3	12	0	3	1	1	1	1	1	1	0	1	0	0	1	1	9	0.75	0	4	4	4	4	16	4	4	3	4	3	14	3.5	4
743	South	South	Female	63	60-69	Married	Buddhist	Non-govt. employee	9000	1000 and over	Lower education (below bachelor)	Good	0	No	3	3	3	3	12	0	3	1	1	1	1	1	0	0	1	1	0	0	1	8	0.666667	0	3	3	3	3	12	3	3	3	3	3	12	3	3
744	South	South	Female	68	60-69	Divorced	Islam	Non-govt. employee	1800	1000 and over	Lower education (below bachelor)	Good	3	Yes	3	3	3	3	12	0	3	1	1	1	1	1	0	1	1	0	0	1	1	9	0.75	0	1	1	1	1	4	1	3	3	3	3	12	3	4
745	South	South	Male	73	70 and over	Married	Buddhist	Unemployed	3000	1000 and over	Lower education (below bachelor)	Good	4	Yes	3	3	3	3	12	0	3	1	1	1	1	1	1	0	0	0	1	1	1	9	0.75	0	2	2	2	2	8	2	3	3	3	3	12	3	4
746	South	South	Male	60	60-69	Married	Buddhist	Govt. employee	25000	1000 and over	Lower education (below bachelor)	Good	0	No	4	4	3	3	14	1	3.5	1	0	1	0	1	1	1	1	0	0	0	0	6	0.5	0	4	4	4	4	16	4	4	4	4	4	16	4	4
747	South	South	Female	67	60-69	Divorced	Buddhist	Govt. employee	15000	1000 and over	Lower education (below bachelor)	Good	1	Yes	4	3	3	3	13	0	3.25	1	1	1	1	1	1	1	1	0	0	0	0	8	0.666667	0	4	3	4	4	15	3.75	4	4	4	4	16	4	4
748	South	South	Male	74	70 and over	Married	Islam	Non-govt. employee	7500	1000 and over	Lower education (below bachelor)	Good	2	Yes	4	3	3	3	13	0	3.25	1	1	1	1	1	0	0	0	1	0	0	0	6	0.5	0	4	4	4	3	15	3.75	4	4	3	4	15	3.75	4
749	South	South	Male	62	60-69	Married	Buddhist	Non-govt. employee	8000	1000 and over	Lower education (below bachelor)	Good	1	Yes	4	4	3	3	14	1	3.5	1	1	1	1	1	0	0	0	1	1	1	1	9	0.75	0	4	4	4	4	16	4	4	4	4	4	16	4	4
750	South	South	Male	63	60-69	Married	Buddhist	Non-govt. employee	20000	1000 and over	Lower education (below bachelor)	Neutral	0	No	3	4	3	3	13	0	3.25	1	1	1	1	1	1	1	1	0	0	1	1	10	0.833333	1	4	4	4	4	16	4	4	4	4	4	16	4	4
751	South	South	Female	60	60-69	Married	Islam	Non-govt. employee	20000	1000 and over	Lower education (below bachelor)	Good	1	Yes	3	4	3	4	14	1	3.5	1	1	1	1	1	1	1	1	0	0	0	1	9	0.75	0	4	4	3	4	15	3.75	4	4	3	3	14	3.5	4
752	South	South	Male	75	70 and over	Divorced	Buddhist	Non-govt. employee	10000	1000 and over	Lower education (below bachelor)	Good	3	Yes	3	3	3	3	12	0	3	1	1	1	1	1	1	1	0	0	0	0	0	7	0.583333	0	4	4	4	4	16	4	3	3	4	3	13	3.25	4
753	South	South	Male	65	60-69	Married	Islam	Non-govt. employee	8000	1000 and over	Lower education (below bachelor)	Good	2	Yes	3	3	3	3	12	0	3	1	1	1	1	1	1	0	1	0	0	0	0	7	0.583333	0	4	4	4	4	16	4	3	3	3	4	13	3.25	4
754	South	South	Male	72	70 and over	Married	Buddhist	Non-govt. employee	8000	1000 and over	Lower education (below bachelor)	Good	1	Yes	3	4	3	3	13	0	3.25	1	1	1	1	1	1	0	0	0	1	0	1	8	0.666667	0	4	4	4	4	16	4	4	4	4	4	16	4	4
755	South	South	Female	67	60-69	Married	Buddhist	Unemployed	3000	1000 and over	Lower education (below bachelor)	Good	3	Yes	3	4	3	3	13	0	3.25	1	1	1	1	1	1	1	1	1	0	0	1	10	0.833333	1	4	4	4	4	16	4	4	4	4	4	16	4	4
756	South	South	Male	64	60-69	Married	Buddhist	Non-govt. employee	7000	1000 and over	Lower education (below bachelor)	Good	2	Yes	3	4	3	3	13	0	3.25	1	1	1	1	1	1	0	1	0	1	1	1	10	0.833333	1	4	4	4	4	16	4	4	4	4	4	16	4	4
757	South	South	Male	64	60-69	Married	Islam	Non-govt. employee	9000	1000 and over	Lower education (below bachelor)	Good	0	No	3	4	3	3	13	0	3.25	1	1	1	1	1	1	1	1	0	0	1	1	10	0.833333	1	4	4	4	4	16	4	4	4	4	4	16	4	4
758	South	South	Male	62	60-69	Married	Buddhist	Non-govt. employee	20000	1000 and over	Bachelor	Good	0	No	3	4	3	3	13	0	3.25	1	1	1	1	1	1	0	1	1	1	1	1	11	0.916667	1	4	4	4	4	16	4	4	4	4	4	16	4	4
759	South	South	Male	65	60-69	Married	Islam	Non-govt. employee	10000	1000 and over	Bachelor	Good	0	No	4	4	3	3	14	1	3.5	1	1	1	1	1	1	0	1	1	1	1	1	11	0.916667	1	4	4	3	3	14	3.5	4	3	4	4	15	3.75	4
760	South	South	Male	61	60-69	Married	Buddhist	Non-govt. employee	11000	1000 and over	Lower education (below bachelor)	Good	1	Yes	4	4	3	3	14	1	3.5	1	1	1	1	1	1	0	1	1	1	1	1	11	0.916667	1	4	4	4	3	15	3.75	3	4	4	4	15	3.75	4
761	South	South	Female	61	60-69	Married	Buddhist	Non-govt. employee	15000	1000 and over	Bachelor	Good	2	Yes	4	4	4	4	16	1	4	1	1	1	1	1	1	1	1	1	0	0	1	10	0.833333	1	1	1	1	1	4	1	3	3	3	3	12	3	4
762	South	South	Male	67	60-69	Married	Islam	Non-govt. employee	15000	1000 and over	Lower education (below bachelor)	Good	1	Yes	4	4	3	3	14	1	3.5	1	1	1	1	1	1	1	1	1	0	1	1	11	0.916667	1	4	4	4	4	16	4	4	4	4	4	16	4	4
763	South	South	Female	67	60-69	Married	Buddhist	Non-govt. employee	12000	1000 and over	Lower education (below bachelor)	Good	0	No	3	4	3	3	13	0	3.25	1	1	1	1	1	1	1	1	1	1	1	1	12	1	1	4	4	4	4	16	4	4	4	4	4	16	4	4
764	South	South	Female	67	60-69	Married	Buddhist	Non-govt. employee	15000	1000 and over	Lower education (below bachelor)	Good	0	No	3	4	4	3	14	1	3.5	1	1	1	1	1	1	1	1	1	1	1	1	12	1	1	4	4	4	3	15	3.75	4	4	4	4	16	4	4
765	South	South	Female	62	60-69	Married	Islam	Govt. employee	20000	1000 and over	Bachelor	Good	0	No	3	4	4	3	14	1	3.5	1	1	1	1	1	1	1	1	1	1	1	1	12	1	1	4	3	4	4	15	3.75	4	4	4	4	16	4	4
766	South	South	Male	62	60-69	Married	Buddhist	Non-govt. employee	10000	1000 and over	Bachelor	Good	1	Yes	3	4	3	3	13	0	3.25	1	1	1	1	1	1	1	1	1	1	1	1	12	1	1	4	4	4	4	16	4	4	4	4	4	16	4	4
767	South	South	Female	65	60-69	Divorced	Buddhist	Non-govt. employee	5000	1000 and over	Lower education (below bachelor)	Good	0	No	3	4	3	3	13	0	3.25	1	1	1	1	1	1	0	1	1	1	1	1	11	0.916667	1	4	3	4	4	15	3.75	4	4	4	4	16	4	4
768	South	South	Male	60	60-69	Married	Buddhist	Non-govt. employee	15000	1000 and over	Lower education (below bachelor)	Bad	0	No	3	3	3	3	12	0	3	1	1	1	1	1	1	0	1	1	1	1	1	11	0.916667	1	4	4	4	4	16	4	4	4	4	4	16	4	4
769	South	South	Female	67	60-69	Divorced	Islam	Unemployed	2700	1000 and over	Lower education (below bachelor)	Very good	2	Yes	3	4	4	4	15	1	3.75	1	1	1	1	1	1	0	1	1	1	1	1	11	0.916667	1	4	4	4	4	16	4	4	4	4	4	16	4	4
770	South	South	Female	60	60-69	Married	Buddhist	Non-govt. employee	7000	1000 and over	Lower education (below bachelor)	Neutral	0	No	3	4	3	3	13	0	3.25	1	1	1	1	1	1	0	1	1	1	1	1	11	0.916667	1	4	3	4	4	15	3.75	4	3	4	4	15	3.75	4
771	South	South	Male	75	70 and over	Divorced	Buddhist	Unemployed	2000	1000 and over	Lower education (below bachelor)	Good	1	Yes	3	3	3	3	12	0	3	1	1	1	1	1	1	1	1	1	0	1	1	11	0.916667	1	4	4	4	4	16	4	4	4	4	3	15	3.75	4
772	South	South	Male	64	60-69	Married	Buddhist	Non-govt. employee	10000	1000 and over	Lower education (below bachelor)	Neutral	1	Yes	3	4	4	4	15	1	3.75	1	1	1	0	1	1	1	1	0	0	0	1	8	0.666667	0	4	4	4	4	16	4	4	4	4	4	16	4	4
773	South	South	Male	71	70 and over	Married	Islam	Non-govt. employee	10000	1000 and over	Lower education (below bachelor)	Neutral	0	No	3	4	3	3	13	0	3.25	1	1	1	1	1	1	1	0	0	0	0	1	8	0.666667	0	3	3	3	3	12	3	3	3	3	3	12	3	4
774	South	South	Male	66	60-69	Divorced	Buddhist	Non-govt. employee	5000	1000 and over	Lower education (below bachelor)	Good	0	No	3	4	4	4	15	1	3.75	1	1	1	1	1	1	0	0	0	1	1	1	9	0.75	0	3	4	4	4	15	3.75	4	3	4	3	14	3.5	4
775	South	South	Male	75	70 and over	Single	Buddhist	Govt. employee	20000	1000 and over	Lower education (below bachelor)	Good	0	No	3	4	4	4	15	1	3.75	1	1	1	1	1	1	1	1	0	0	0	1	9	0.75	0	4	3	4	4	15	3.75	4	4	4	4	16	4	4
776	South	South	Female	62	60-69	Single	Buddhist	Non-govt. employee	3000	1000 and over	Lower education (below bachelor)	Neutral	0	No	3	4	4	4	15	1	3.75	1	1	1	1	0	0	0	1	0	0	1	1	7	0.583333	0	4	4	3	3	14	3.5	3	4	4	4	15	3.75	4
777	South	South	Female	63	60-69	Married	Buddhist	Non-govt. employee	5000	1000 and over	Lower education (below bachelor)	Neutral	0	No	3	3	3	3	12	0	3	1	1	1	0	0	1	0	1	0	1	1	1	8	0.666667	0	3	3	3	2	11	2.75	3	3	3	3	12	3	3
778	South	South	Male	64	60-69	Married	Buddhist	Govt. employee	30000	1000 and over	Bachelor	Good	3	Yes	4	3	3	3	13	0	3.25	1	1	1	1	1	1	1	1	0	0	0	0	8	0.666667	0	3	4	4	4	15	3.75	3	3	4	4	14	3.5	4
779	South	South	Male	73	70 and over	Married	Islam	Non-govt. employee	5000	1000 and over	Lower education (below bachelor)	Good	1	Yes	4	4	3	3	14	1	3.5	1	1	1	1	1	1	1	1	0	0	0	1	9	0.75	0	4	3	4	4	15	3.75	4	3	4	4	15	3.75	4
780	South	South	Male	65	60-69	Married	Islam	Non-govt. employee	7000	1000 and over	Lower education (below bachelor)	Good	1	Yes	4	4	3	3	14	1	3.5	1	1	1	0	0	0	0	1	1	1	0	1	7	0.583333	0	4	4	4	4	16	4	3	4	4	4	15	3.75	4
781	South	South	Female	65	60-69	Married	Islam	Non-govt. employee	5000	1000 and over	Lower education (below bachelor)	Good	3	Yes	4	4	3	3	14	1	3.5	1	1	1	1	1	0	0	1	0	1	0	1	8	0.666667	0	3	3	3	3	12	3	3	3	3	3	12	3	4
782	South	South	Male	65	60-69	Married	Islam	Unemployed	1500	1000 and over	Lower education (below bachelor)	Good	1	Yes	4	4	3	3	14	1	3.5	1	1	1	0	1	0	1	1	1	0	0	1	8	0.666667	0	4	3	4	4	15	3.75	3	3	4	4	14	3.5	4
783	South	South	Male	71	70 and over	Married	Buddhist	Non-govt. employee	3000	1000 and over	Lower education (below bachelor)	Good	2	Yes	4	4	3	3	14	1	3.5	1	1	1	1	1	1	0	1	0	0	0	0	7	0.583333	0	4	3	3	3	13	3.25	1	1	1	1	4	1	4
784	South	South	Female	68	60-69	Divorced	Buddhist	Non-govt. employee	3500	1000 and over	Lower education (below bachelor)	Neutral	0	No	4	4	3	3	14	1	3.5	1	1	1	1	1	0	0	1	1	0	0	0	7	0.583333	0	4	3	4	4	15	3.75	4	4	4	4	16	4	4
785	South	South	Male	67	60-69	Married	Buddhist	Non-govt. employee	5000	1000 and over	Lower education (below bachelor)	Neutral	0	No	4	4	4	3	15	1	3.75	1	1	1	1	1	1	0	1	0	0	0	0	7	0.583333	0	2	2	2	2	8	2	4	4	4	3	15	3.75	4
786	South	South	Male	65	60-69	Single	Buddhist	Unemployed	2000	1000 and over	Lower education (below bachelor)	Good	1	Yes	4	4	3	3	14	1	3.5	1	1	1	1	1	1	0	0	1	0	0	0	7	0.583333	0	4	4	4	4	16	4	4	3	3	4	14	3.5	4
787	South	South	Female	63	60-69	Married	Islam	Non-govt. employee	5000	1000 and over	Lower education (below bachelor)	Good	1	Yes	4	4	3	4	15	1	3.75	1	1	1	1	1	1	1	1	1	1	1	1	12	1	1	4	4	4	4	16	4	4	4	3	3	14	3.5	3
788	South	South	Male	73	70 and over	Married	Buddhist	Unemployed	1500	1000 and over	Lower education (below bachelor)	Good	2	Yes	4	4	3	3	14	1	3.5	1	1	1	1	1	1	1	1	1	1	1	1	12	1	1	4	4	4	4	16	4	4	4	4	4	16	4	3
789	South	South	Male	63	60-69	Divorced	Islam	Unemployed	1500	1000 and over	Lower education (below bachelor)	Good	2	Yes	3	3	3	3	12	0	3	1	1	1	1	1	1	1	1	1	0	1	1	11	0.916667	1	4	4	4	4	16	4	4	4	4	4	16	4	3
790	South	South	Male	62	60-69	Single	Islam	Unemployed	1500	1000 and over	Lower education (below bachelor)	Good	3	Yes	3	3	3	3	12	0	3	1	1	1	1	1	1	0	1	1	1	1	1	11	0.916667	1	4	4	4	4	16	4	3	3	4	4	14	3.5	4
791	South	South	Female	64	60-69	Divorced	Buddhist	Non-govt. employee	10000	1000 and over	Lower education (below bachelor)	Good	1	Yes	4	4	4	4	16	1	4	1	1	1	1	1	1	0	0	1	1	1	1	10	0.833333	1	4	4	4	4	16	4	4	4	4	4	16	4	4
792	South	South	Male	71	70 and over	Married	Buddhist	Unemployed	2000	1000 and over	Lower education (below bachelor)	Good	2	Yes	4	3	4	3	14	1	3.5	1	1	1	1	1	1	1	1	1	0	0	1	10	0.833333	1	4	4	4	4	16	4	4	4	4	4	16	4	4
793	South	South	Female	70	70 and over	Married	Islam	Non-govt. employee	3000	1000 and over	Lower education (below bachelor)	Good	2	Yes	3	3	4	4	14	1	3.5	1	1	1	1	1	0	0	1	1	1	0	1	9	0.75	0	4	4	4	4	16	4	4	4	4	4	16	4	4
794	South	South	Female	60	60-69	Married	Islam	Non-govt. employee	7000	1000 and over	Lower education (below bachelor)	Good	2	Yes	4	4	3	3	14	1	3.5	1	1	1	1	1	1	0	1	1	1	0	1	10	0.833333	1	4	4	4	4	16	4	4	4	4	4	16	4	4
795	South	South	Male	67	60-69	Married	Buddhist	Non-govt. employee	2500	1000 and over	Lower education (below bachelor)	Good	1	Yes	3	4	4	3	14	1	3.5	1	1	1	1	1	1	0	1	1	1	1	1	11	0.916667	1	4	4	4	4	16	4	4	4	3	4	15	3.75	4
796	South	South	Female	67	60-69	Divorced	Islam	Non-govt. employee	2000	1000 and over	Lower education (below bachelor)	Good	1	Yes	4	4	3	3	14	1	3.5	1	1	1	1	1	1	1	1	1	0	1	1	11	0.916667	1	4	4	4	4	16	4	3	4	4	4	15	3.75	4
797	South	South	Female	64	60-69	Married	Buddhist	Non-govt. employee	4500	1000 and over	Lower education (below bachelor)	Good	1	Yes	4	4	3	3	14	1	3.5	1	1	1	1	1	1	0	1	1	0	1	1	10	0.833333	1	4	4	4	4	16	4	3	3	4	4	14	3.5	3
798	South	South	Female	69	60-69	Divorced	Buddhist	Non-govt. employee	2000	1000 and over	Lower education (below bachelor)	Very good	1	Yes	4	4	4	4	16	1	4	1	1	1	1	1	1	1	1	1	1	0	0	10	0.833333	1	4	3	4	4	15	3.75	3	4	3	4	14	3.5	4
799	South	South	Female	75	70 and over	Married	Buddhist	Non-govt. employee	5000	1000 and over	Lower education (below bachelor)	Good	2	Yes	4	4	3	3	14	1	3.5	1	1	1	1	1	1	0	1	1	1	1	1	11	0.916667	1	4	3	4	4	15	3.75	3	3	4	4	14	3.5	4
800	South	South	Female	62	60-69	Single	Buddhist	Non-govt. employee	6000	1000 and over	Lower education (below bachelor)	Neutral	0	No	4	4	3	3	14	1	3.5	1	1	1	1	1	1	0	1	1	1	1	1	11	0.916667	1	4	4	4	4	16	4	3	4	4	4	15	3.75	4
801	South	South	Male	70	70 and over	Married	Islam	Non-govt. employee	10000	1000 and over	Lower education (below bachelor)	Neutral	0	No	4	4	4	4	16	1	4	1	1	1	1	1	1	0	1	1	1	0	1	10	0.833333	1	4	3	4	4	15	3.75	4	3	3	4	14	3.5	4
802	South	South	Female	73	70 and over	Married	Buddhist	Unemployed	2500	1000 and over	Uneducated	Very good	3	Yes	4	4	4	4	16	1	4	1	1	1	1	1	1	0	1	1	0	0	1	9	0.75	0	4	3	3	3	13	3.25	3	3	4	4	14	3.5	4
803	South	South	Female	68	60-69	Married	Buddhist	Unemployed	2000	1000 and over	Lower education (below bachelor)	Good	2	Yes	4	4	3	3	14	1	3.5	1	1	1	1	1	1	0	1	1	0	0	1	9	0.75	0	4	3	4	3	14	3.5	4	4	4	3	15	3.75	4
804	South	South	Male	72	70 and over	Married	Islam	Non-govt. employee	3000	1000 and over	Lower education (below bachelor)	Good	2	Yes	4	4	3	4	15	1	3.75	1	1	1	1	1	1	0	1	1	1	0	1	10	0.833333	1	4	4	4	4	16	4	4	2	4	4	14	3.5	4
805	South	South	Male	69	60-69	Married	Buddhist	Non-govt. employee	3000	1000 and over	Lower education (below bachelor)	Good	3	Yes	4	4	4	4	16	1	4	1	1	0	0	0	1	0	1	1	1	1	1	8	0.666667	0	4	3	4	4	15	3.75	3	4	4	4	15	3.75	4
806	South	South	Female	71	70 and over	Divorced	Buddhist	Unemployed	2000	1000 and over	Lower education (below bachelor)	Good	4	Yes	4	4	3	3	14	1	3.5	1	1	1	1	1	1	1	1	1	0	0	0	9	0.75	0	4	3	4	4	15	3.75	3	3	3	3	12	3	4
807	South	South	Female	66	60-69	Divorced	Buddhist	Unemployed	1200	1000 and over	Lower education (below bachelor)	Good	2	Yes	4	4	3	3	14	1	3.5	1	1	1	1	1	1	0	1	1	0	0	1	9	0.75	0	3	4	4	4	15	3.75	4	4	3	4	15	3.75	4
808	South	South	Female	65	60-69	Divorced	Islam	Non-govt. employee	2000	1000 and over	Lower education (below bachelor)	Good	3	Yes	4	4	4	4	16	1	4	1	1	1	1	1	1	1	1	1	0	1	1	11	0.916667	1	4	4	3	3	14	3.5	3	3	4	4	14	3.5	4
809	South	South	Male	64	60-69	Divorced	Buddhist	Unemployed	1500	1000 and over	Lower education (below bachelor)	Good	3	Yes	4	4	3	3	14	1	3.5	1	1	1	1	1	1	1	1	1	1	0	0	10	0.833333	1	4	4	4	4	16	4	4	4	4	3	15	3.75	4
810	South	South	Female	64	60-69	Single	Buddhist	Unemployed	1500	1000 and over	Lower education (below bachelor)	Good	2	Yes	4	4	3	3	14	1	3.5	1	1	1	1	1	1	1	0	1	0	0	1	9	0.75	0	4	4	4	4	16	4	4	4	3	4	15	3.75	3
811	South	South	Male	67	60-69	Single	Buddhist	Unemployed	2000	1000 and over	Lower education (below bachelor)	Good	1	Yes	4	3	3	3	13	0	3.25	1	1	1	1	1	1	0	0	0	0	1	1	8	0.666667	0	4	4	4	4	16	4	4	3	3	4	14	3.5	4
812	South	South	Female	63	60-69	Divorced	Buddhist	Non-govt. employee	8000	1000 and over	Lower education (below bachelor)	Good	2	Yes	4	3	3	3	13	0	3.25	1	1	1	1	0	1	1	1	1	0	0	1	9	0.75	0	4	4	4	4	16	4	3	4	3	4	14	3.5	4
813	South	South	Female	63	60-69	Divorced	Islam	Non-govt. employee	6000	1000 and over	Lower education (below bachelor)	Neutral	0	No	4	3	3	3	13	0	3.25	1	1	1	1	1	1	0	1	1	1	0	1	10	0.833333	1	4	4	4	4	16	4	4	3	3	3	13	3.25	4
814	South	South	Male	62	60-69	Married	Buddhist	Non-govt. employee	10000	1000 and over	Lower education (below bachelor)	Good	1	Yes	4	4	3	3	14	1	3.5	1	1	1	1	0	1	0	1	1	0	0	1	8	0.666667	0	4	4	4	4	16	4	4	3	4	3	14	3.5	4
815	South	South	Female	67	60-69	Married	Buddhist	Non-govt. employee	2500	1000 and over	Lower education (below bachelor)	Good	2	Yes	4	3	3	3	13	0	3.25	1	1	1	1	1	1	0	0	1	0	0	1	8	0.666667	0	4	4	4	4	16	4	3	3	4	4	14	3.5	3
816	South	South	Male	69	60-69	Divorced	Buddhist	Non-govt. employee	5000	1000 and over	Lower education (below bachelor)	Good	2	Yes	4	3	3	3	13	0	3.25	1	1	1	1	1	1	0	1	0	0	0	1	8	0.666667	0	3	4	4	3	14	3.5	4	3	3	4	14	3.5	3
817	South	South	Male	72	70 and over	Married	Buddhist	Non-govt. employee	10000	1000 and over	Lower education (below bachelor)	Good	1	Yes	4	3	3	3	13	0	3.25	1	1	1	1	1	1	1	0	1	1	0	0	9	0.75	0	4	4	3	3	14	3.5	4	4	4	4	16	4	3
818	South	South	Male	60	60-69	Married	Buddhist	Non-govt. employee	9000	1000 and over	Lower education (below bachelor)	Neutral	0	No	4	4	4	3	15	1	3.75	1	1	1	1	0	1	1	1	1	1	1	1	11	0.916667	1	4	4	4	4	16	4	4	4	4	4	16	4	4
819	South	South	Female	61	60-69	Married	Buddhist	Non-govt. employee	9000	1000 and over	Lower education (below bachelor)	Good	1	Yes	4	4	4	3	15	1	3.75	1	1	1	1	1	1	0	1	1	1	0	1	10	0.833333	1	4	4	3	2	13	3.25	4	4	4	4	16	4	4
820	South	South	Female	68	60-69	Married	Buddhist	Non-govt. employee	10000	1000 and over	Lower education (below bachelor)	Neutral	1	Yes	4	4	4	4	16	1	4	1	1	1	1	0	0	0	1	1	0	0	1	7	0.583333	0	3	3	3	4	13	3.25	4	4	4	4	16	4	4
821	South	South	Female	66	60-69	Married	Buddhist	Non-govt. employee	7000	1000 and over	Lower education (below bachelor)	Good	3	Yes	4	4	4	4	16	1	4	1	1	1	1	1	1	1	0	1	0	0	1	9	0.75	0	4	4	4	4	16	4	4	4	4	4	16	4	4
822	South	South	Male	67	60-69	Married	Buddhist	Govt. employee	13600	1000 and over	Lower education (below bachelor)	Neutral	0	No	4	4	3	3	14	1	3.5	1	1	1	1	1	1	0	1	0	0	0	1	8	0.666667	0	4	4	4	4	16	4	4	3	4	4	15	3.75	4
823	South	South	Female	69	60-69	Divorced	Buddhist	Non-govt. employee	5000	1000 and over	Lower education (below bachelor)	Neutral	0	No	4	4	3	4	15	1	3.75	1	1	1	1	0	1	0	1	1	1	0	1	9	0.75	0	4	4	4	4	16	4	3	3	4	4	14	3.5	4
824	South	South	Male	61	60-69	Married	Buddhist	Non-govt. employee	10000	1000 and over	Lower education (below bachelor)	Good	1	Yes	4	4	4	4	16	1	4	1	1	1	1	0	1	1	1	1	1	1	1	11	0.916667	1	4	4	4	4	16	4	4	4	4	4	16	4	4
825	South	South	Female	70	70 and over	Divorced	Buddhist	Non-govt. employee	10000	1000 and over	Lower education (below bachelor)	Good	2	Yes	4	4	3	3	14	1	3.5	1	1	1	1	0	1	0	0	0	0	1	1	7	0.583333	0	3	4	4	4	15	3.75	3	4	4	3	14	3.5	4
826	South	South	Male	61	60-69	Married	Buddhist	Non-govt. employee	9000	1000 and over	Lower education (below bachelor)	Good	1	Yes	4	3	3	3	13	0	3.25	1	1	1	1	1	1	0	0	1	0	0	1	8	0.666667	0	4	3	4	4	15	3.75	4	4	4	3	15	3.75	4
827	South	South	Female	69	60-69	Married	Buddhist	Non-govt. employee	3600	1000 and over	Lower education (below bachelor)	Neutral	0	No	4	4	3	3	14	1	3.5	1	1	1	1	1	1	0	1	0	0	0	1	8	0.666667	0	4	3	4	4	15	3.75	3	3	3	4	13	3.25	4
828	South	South	Male	62	60-69	Married	Buddhist	Non-govt. employee	8000	1000 and over	Lower education (below bachelor)	Neutral	0	No	4	3	3	4	14	1	3.5	1	1	1	1	1	1	1	1	0	1	1	1	11	0.916667	1	4	4	4	4	16	4	3	3	3	3	12	3	4
829	South	South	Female	64	60-69	Married	Buddhist	Non-govt. employee	2000	1000 and over	Lower education (below bachelor)	Good	2	Yes	4	3	3	3	13	0	3.25	1	1	1	1	1	1	0	1	1	1	1	1	11	0.916667	1	4	4	4	4	16	4	3	3	3	3	12	3	4
830	South	South	Male	67	60-69	Married	Buddhist	Non-govt. employee	5000	1000 and over	Lower education (below bachelor)	Neutral	0	No	4	3	3	3	13	0	3.25	1	1	1	1	1	1	1	1	1	1	1	1	12	1	1	4	4	4	4	16	4	4	4	4	4	16	4	4
831	South	South	Male	66	60-69	Married	Buddhist	Non-govt. employee	5000	1000 and over	Lower education (below bachelor)	Neutral	0	No	4	4	4	3	15	1	3.75	1	1	1	1	1	1	1	1	1	1	1	1	12	1	1	3	3	3	4	13	3.25	3	3	4	4	14	3.5	4
832	South	South	Female	63	60-69	Married	Buddhist	Non-govt. employee	3000	1000 and over	Lower education (below bachelor)	Neutral	0	No	4	4	3	3	14	1	3.5	1	1	1	1	1	1	1	1	1	1	1	1	12	1	1	4	4	3	4	15	3.75	4	3	3	4	14	3.5	3
833	South	South	Female	69	60-69	Divorced	Buddhist	Unemployed	2000	1000 and over	Lower education (below bachelor)	Good	1	Yes	4	4	3	4	15	1	3.75	1	1	1	1	1	1	1	1	1	1	1	1	12	1	1	3	3	4	4	14	3.5	4	3	4	4	15	3.75	4
834	South	South	Female	79	70 and over	Divorced	Buddhist	Unemployed	2500	1000 and over	Lower education (below bachelor)	Good	1	Yes	4	4	3	3	14	1	3.5	1	1	1	1	0	1	0	0	0	1	1	1	8	0.666667	0	4	3	3	4	14	3.5	4	3	4	4	15	3.75	4
835	South	South	Female	63	60-69	Divorced	Buddhist	Non-govt. employee	6000	1000 and over	Lower education (below bachelor)	Good	2	Yes	4	4	4	4	16	1	4	1	1	1	1	1	1	1	1	0	0	0	1	9	0.75	0	4	4	4	4	16	4	4	3	4	3	14	3.5	4
836	South	South	Female	64	60-69	Married	Buddhist	Non-govt. employee	3000	1000 and over	Lower education (below bachelor)	Good	3	Yes	4	4	4	4	16	1	4	1	1	1	1	1	1	1	0	1	0	1	1	10	0.833333	1	4	3	4	4	15	3.75	4	4	4	3	15	3.75	4
837	South	South	Female	62	60-69	Divorced	Buddhist	Non-govt. employee	6000	1000 and over	Lower education (below bachelor)	Good	2	Yes	4	4	4	4	16	1	4	1	1	1	1	1	1	1	1	1	1	0	1	11	0.916667	1	3	3	4	4	14	3.5	4	4	4	4	16	4	4
838	South	South	Female	63	60-69	Married	Buddhist	Unemployed	2000	1000 and over	Lower education (below bachelor)	Good	1	Yes	4	4	3	3	14	1	3.5	1	1	1	1	1	1	1	1	1	1	0	0	10	0.833333	1	4	3	3	4	14	3.5	3	3	4	4	14	3.5	4
839	South	South	Female	60	60-69	Married	Buddhist	Non-govt. employee	7000	1000 and over	Lower education (below bachelor)	Neutral	0	No	4	4	3	4	15	1	3.75	1	1	1	1	1	1	0	1	1	1	1	1	11	0.916667	1	4	3	4	4	15	3.75	4	4	4	4	16	4	4
840	South	South	Male	68	60-69	Divorced	Islam	Non-govt. employee	2300	1000 and over	Lower education (below bachelor)	Good	2	Yes	4	4	3	4	15	1	3.75	1	1	1	1	1	1	0	1	1	0	1	1	10	0.833333	1	4	4	3	3	14	3.5	4	4	4	4	16	4	4
841	South	South	Male	61	60-69	Married	Buddhist	Non-govt. employee	5600	1000 and over	Lower education (below bachelor)	Good	2	Yes	4	4	3	4	15	1	3.75	1	1	1	1	1	1	0	1	1	1	1	1	11	0.916667	1	4	4	4	3	15	3.75	4	4	4	4	16	4	4
842	South	South	Female	71	70 and over	Divorced	Buddhist	Unemployed	2000	1000 and over	Lower education (below bachelor)	Good	2	Yes	4	4	3	3	14	1	3.5	1	1	1	1	0	1	1	1	1	0	1	1	10	0.833333	1	1	1	1	1	4	1	4	4	4	4	16	4	4
843	South	South	Female	67	60-69	Married	Islam	Non-govt. employee	2500	1000 and over	Lower education (below bachelor)	Good	1	Yes	4	4	4	3	15	1	3.75	1	1	1	1	1	0	0	1	1	0	1	1	9	0.75	0	3	3	3	3	12	3	4	4	4	4	16	4	4
844	South	South	Female	62	60-69	Divorced	Buddhist	Non-govt. employee	5000	1000 and over	Lower education (below bachelor)	Good	2	Yes	4	4	3	4	15	1	3.75	1	1	1	1	1	1	0	1	1	1	1	1	11	0.916667	1	4	3	3	3	13	3.25	4	4	4	4	16	4	3
845	South	South	Male	64	60-69	Divorced	Islam	Non-govt. employee	10000	1000 and over	Lower education (below bachelor)	Good	1	Yes	4	4	3	4	15	1	3.75	1	1	1	1	1	1	1	1	1	1	1	1	12	1	1	4	4	4	4	16	4	4	4	4	3	15	3.75	3
846	South	South	Male	66	60-69	Divorced	Buddhist	Non-govt. employee	4000	1000 and over	Lower education (below bachelor)	Good	1	Yes	4	4	4	4	16	1	4	1	1	1	1	1	1	0	1	1	1	1	1	11	0.916667	1	4	4	4	4	16	4	4	4	4	4	16	4	3
847	South	South	Female	68	60-69	Married	Islam	Non-govt. employee	5000	1000 and over	Lower education (below bachelor)	Good	1	Yes	4	4	4	4	16	1	4	1	1	1	1	1	1	1	1	1	0	1	1	11	0.916667	1	4	4	4	4	16	4	4	4	4	3	15	3.75	4
848	South	South	Male	68	60-69	Married	Buddhist	Non-govt. employee	10000	1000 and over	Lower education (below bachelor)	Neutral	0	No	4	4	3	4	15	1	3.75	1	1	1	1	1	0	1	1	1	1	1	1	11	0.916667	1	4	4	4	4	16	4	4	4	4	3	15	3.75	3
849	South	South	Female	63	60-69	Divorced	Buddhist	Non-govt. employee	5000	1000 and over	Uneducated	Good	1	Yes	4	3	3	3	13	0	3.25	1	1	1	1	1	1	1	1	1	0	0	1	10	0.833333	1	4	4	3	4	15	3.75	4	4	4	3	15	3.75	4
850	South	South	Female	65	60-69	Married	Islam	Non-govt. employee	6000	1000 and over	Lower education (below bachelor)	Good	1	Yes	4	3	3	4	14	1	3.5	1	1	1	1	1	1	0	1	1	1	1	1	11	0.916667	1	4	4	4	4	16	4	4	4	4	4	16	4	3
851	South	South	Male	64	60-69	Married	Buddhist	Non-govt. employee	7000	1000 and over	Lower education (below bachelor)	Good	1	Yes	4	3	3	4	14	1	3.5	1	1	1	1	1	1	1	1	1	1	1	1	12	1	1	4	3	4	4	15	3.75	4	4	4	4	16	4	3
852	South	South	Female	64	60-69	Married	Islam	Non-govt. employee	6000	1000 and over	Lower education (below bachelor)	Good	1	Yes	4	3	4	4	15	1	3.75	1	1	1	1	1	1	0	1	1	1	1	1	11	0.916667	1	4	4	3	2	13	3.25	4	4	4	4	16	4	4
853	South	South	Female	65	60-69	Divorced	Buddhist	Non-govt. employee	4000	1000 and over	Lower education (below bachelor)	Good	1	Yes	2	3	3	4	12	0	3	1	1	1	1	0	0	1	1	0	1	0	1	8	0.666667	0	4	4	4	4	16	4	4	4	4	4	16	4	4
854	South	South	Male	65	60-69	Married	Buddhist	Non-govt. employee	5000	1000 and over	Lower education (below bachelor)	Good	2	Yes	2	3	3	4	12	0	3	1	1	1	1	0	0	1	1	0	1	0	1	8	0.666667	0	4	4	4	3	15	3.75	4	4	4	4	16	4	4
855	South	South	Female	62	60-69	Married	Islam	Non-govt. employee	10000	1000 and over	Lower education (below bachelor)	Good	3	Yes	2	3	4	4	13	0	3.25	1	1	1	1	0	0	1	1	0	0	0	1	7	0.583333	0	4	4	4	4	16	4	4	4	4	4	16	4	3
856	South	South	Female	66	60-69	Married	Buddhist	Non-govt. employee	5000	1000 and over	Lower education (below bachelor)	Good	1	Yes	4	3	4	4	15	1	3.75	1	1	1	1	0	0	1	1	0	0	0	1	7	0.583333	0	4	4	4	4	16	4	4	4	4	4	16	4	3
857	South	South	Female	66	60-69	Divorced	Islam	Non-govt. employee	13000	1000 and over	Lower education (below bachelor)	Neutral	0	No	4	3	4	4	15	1	3.75	1	1	1	1	0	0	1	1	0	1	0	1	8	0.666667	0	4	4	4	4	16	4	4	4	4	4	16	4	3
858	South	South	Male	66	60-69	Married	Islam	Unemployed	2000	1000 and over	Lower education (below bachelor)	Good	3	Yes	4	3	3	4	14	1	3.5	1	1	1	1	0	0	1	1	0	1	0	0	7	0.583333	0	4	4	4	4	16	4	4	4	4	4	16	4	4
859	South	South	Female	60	60-69	Married	Islam	Non-govt. employee	3000	1000 and over	Lower education (below bachelor)	Good	2	Yes	4	3	3	4	14	1	3.5	1	1	1	1	0	0	1	1	0	1	0	1	8	0.666667	0	4	4	4	4	16	4	4	4	4	4	16	4	4
860	South	South	Male	68	60-69	Married	Buddhist	Non-govt. employee	10000	1000 and over	Lower education (below bachelor)	Neutral	0	No	4	3	4	4	15	1	3.75	1	1	1	1	1	0	1	0	0	0	0	1	7	0.583333	0	4	4	4	4	16	4	4	4	4	4	16	4	4
861	South	South	Female	62	60-69	Married	Buddhist	Non-govt. employee	6000	1000 and over	Lower education (below bachelor)	Good	1	Yes	4	3	4	4	15	1	3.75	1	1	1	1	0	0	1	1	0	0	1	1	8	0.666667	0	4	4	4	4	16	4	4	4	4	4	16	4	4
862	South	South	Male	60	60-69	Married	Islam	Non-govt. employee	6500	1000 and over	Lower education (below bachelor)	Good	1	Yes	4	4	4	4	16	1	4	1	1	1	1	1	1	0	1	1	0	1	0	9	0.75	0	4	3	4	4	15	3.75	4	4	4	4	16	4	4
863	South	South	Female	63	60-69	Married	Buddhist	Non-govt. employee	9000	1000 and over	Lower education (below bachelor)	Good	1	Yes	4	4	3	4	15	1	3.75	1	1	1	1	1	1	0	1	0	0	0	1	8	0.666667	0	4	4	3	3	14	3.5	4	4	4	4	16	4	4
864	South	South	Male	67	60-69	Married	Islam	Non-govt. employee	6000	1000 and over	Lower education (below bachelor)	Good	2	Yes	2	4	4	4	14	1	3.5	1	1	1	1	1	1	1	1	1	1	0	1	11	0.916667	1	3	3	4	3	13	3.25	4	3	3	4	14	3.5	4
865	South	South	Female	70	70 and over	Divorced	Buddhist	Non-govt. employee	2000	1000 and over	Lower education (below bachelor)	Good	2	Yes	2	4	4	3	13	0	3.25	1	1	1	1	1	1	1	1	1	0	1	1	11	0.916667	1	2	2	2	2	8	2	3	4	3	4	14	3.5	4
866	South	South	Female	60	60-69	Married	Buddhist	Unemployed	2500	1000 and over	Lower education (below bachelor)	Neutral	2	Yes	3	3	4	3	13	0	3.25	1	1	0	1	1	1	1	1	1	1	0	1	10	0.833333	1	4	4	3	4	15	3.75	4	4	4	3	15	3.75	4
867	South	South	Male	63	60-69	Divorced	Buddhist	Non-govt. employee	3500	1000 and over	Lower education (below bachelor)	Very good	3	Yes	3	4	4	4	15	1	3.75	1	1	1	1	0	0	1	0	1	1	1	1	9	0.75	0	4	4	4	3	15	3.75	4	4	4	4	16	4	4
868	South	South	Male	68	60-69	Divorced	Buddhist	Non-govt. employee	6000	1000 and over	Lower education (below bachelor)	Good	3	Yes	3	3	4	3	13	0	3.25	1	0	1	1	1	1	1	0	1	1	1	1	10	0.833333	1	4	4	4	4	16	4	4	4	4	4	16	4	4
869	South	South	Female	68	60-69	Divorced	Buddhist	Non-govt. employee	3000	1000 and over	Lower education (below bachelor)	Very good	5	Yes	3	4	3	4	14	1	3.5	1	1	0	1	1	1	1	1	1	1	1	1	11	0.916667	1	3	4	4	4	15	3.75	4	4	4	4	16	4	4
870	South	South	Female	65	60-69	Divorced	Buddhist	Non-govt. employee	1200	1000 and over	Lower education (below bachelor)	Good	1	Yes	3	3	3	3	12	0	3	1	1	1	1	1	1	0	1	0	0	0	1	8	0.666667	0	4	4	4	3	15	3.75	3	2	3	3	11	2.75	4
871	South	South	Female	69	60-69	Divorced	Buddhist	Non-govt. employee	1200	1000 and over	Lower education (below bachelor)	Neutral	0	No	3	4	3	3	13	0	3.25	1	1	1	1	1	1	1	0	1	0	0	0	8	0.666667	0	4	3	4	4	15	3.75	3	4	4	4	15	3.75	4
872	South	South	Female	68	60-69	Divorced	Buddhist	Non-govt. employee	2000	1000 and over	Lower education (below bachelor)	Good	1	Yes	3	3	3	3	12	0	3	1	1	1	1	1	1	0	1	0	0	0	0	7	0.583333	0	4	4	4	4	16	4	2	2	4	4	12	3	4
873	South	South	Male	74	70 and over	Married	Buddhist	Non-govt. employee	5000	1000 and over	Lower education (below bachelor)	Good	1	Yes	3	3	3	3	12	0	3	1	1	1	1	1	1	0	0	0	0	0	1	7	0.583333	0	4	3	4	4	15	3.75	4	4	4	4	16	4	4
874	South	South	Female	72	70 and over	Married	Buddhist	Unemployed	2000	1000 and over	Lower education (below bachelor)	Good	2	Yes	3	3	3	3	12	0	3	1	1	1	1	1	1	0	1	1	1	0	0	9	0.75	0	3	4	4	4	15	3.75	4	4	4	4	16	4	4
875	South	South	Female	69	60-69	Divorced	Buddhist	Non-govt. employee	7000	1000 and over	Lower education (below bachelor)	Good	3	Yes	4	4	4	4	16	1	4	1	1	1	1	1	1	1	1	1	1	1	1	12	1	1	4	4	4	4	16	4	4	4	4	4	16	4	4
876	South	South	Male	65	60-69	Married	Buddhist	Non-govt. employee	6000	1000 and over	Lower education (below bachelor)	Good	0	No	2	3	4	3	12	0	3	1	1	1	1	1	1	0	1	1	0	0	0	8	0.666667	0	4	4	4	4	16	4	4	4	4	4	16	4	4
877	South	South	Male	69	60-69	Married	Buddhist	Non-govt. employee	20000	1000 and over	Lower education (below bachelor)	Good	2	Yes	3	3	3	3	12	0	3	1	1	0	1	1	1	0	1	1	0	0	0	7	0.583333	0	4	3	4	4	15	3.75	3	4	4	4	15	3.75	3
878	South	South	Female	69	60-69	Married	Buddhist	Non-govt. employee	20000	1000 and over	Lower education (below bachelor)	Good	4	Yes	4	3	3	3	13	0	3.25	1	1	0	1	1	1	0	1	1	1	0	0	8	0.666667	0	3	3	3	4	13	3.25	4	4	4	4	16	4	4
879	South	South	Female	71	70 and over	Divorced	Buddhist	Unemployed	1000	1000 and over	Lower education (below bachelor)	Good	1	Yes	3	3	3	3	12	0	3	1	1	0	1	1	1	0	1	1	0	0	1	8	0.666667	0	4	4	4	2	14	3.5	4	4	4	3	15	3.75	3
880	South	South	Female	67	60-69	Married	Buddhist	Govt. employee	15000	1000 and over	Lower education (below bachelor)	Neutral	0	No	3	4	4	3	14	1	3.5	1	1	1	1	1	1	1	1	0	0	1	1	10	0.833333	1	3	3	4	2	12	3	4	4	4	4	16	4	4
881	South	South	Female	75	70 and over	Divorced	Buddhist	Unemployed	2500	1000 and over	Lower education (below bachelor)	Good	2	Yes	3	3	3	3	12	0	3	1	1	1	1	1	1	1	1	1	0	1	1	11	0.916667	1	4	3	3	4	14	3.5	4	4	4	4	16	4	4
882	South	South	Female	61	60-69	Divorced	Buddhist	Non-govt. employee	5000	1000 and over	Lower education (below bachelor)	Good	1	Yes	3	4	3	3	13	0	3.25	1	1	0	1	1	1	1	1	1	1	1	0	10	0.833333	1	3	3	3	3	12	3	4	3	3	4	14	3.5	4
883	South	South	Female	75	70 and over	Divorced	Buddhist	Unemployed	1500	1000 and over	Uneducated	Good	2	Yes	3	3	3	3	12	0	3	1	1	0	1	1	1	1	1	1	1	1	1	11	0.916667	1	4	3	4	4	15	3.75	4	4	4	4	16	4	4
884	South	South	Male	68	60-69	Married	Christian	Unemployed	2500	1000 and over	Lower education (below bachelor)	Good	0	No	3	3	3	3	12	0	3	1	1	0	1	1	1	1	1	1	1	1	1	11	0.916667	1	3	4	3	3	13	3.25	3	2	4	4	13	3.25	4
885	South	South	Female	74	70 and over	Divorced	Buddhist	Unemployed	1000	1000 and over	Lower education (below bachelor)	Good	3	Yes	3	3	3	3	12	0	3	1	1	1	1	1	1	1	1	1	1	1	1	12	1	1	4	3	3	3	13	3.25	4	4	4	4	16	4	4
886	South	South	Female	65	60-69	Married	Christian	Unemployed	5000	1000 and over	Lower education (below bachelor)	Good	3	Yes	3	3	3	3	12	0	3	1	1	0	1	1	1	1	1	1	1	1	1	11	0.916667	1	3	3	4	3	13	3.25	4	4	4	4	16	4	4
887	South	South	Female	74	70 and over	Divorced	Buddhist	Unemployed	1000	1000 and over	Lower education (below bachelor)	Good	2	Yes	4	4	3	3	14	1	3.5	1	1	1	1	1	1	1	1	1	0	0	1	10	0.833333	1	4	4	4	4	16	4	4	4	4	4	16	4	4
888	South	South	Female	67	60-69	Married	Buddhist	Govt. employee	25000	1000 and over	Bachelor	Good	0	No	3	3	3	3	12	0	3	1	1	1	1	1	1	0	1	1	1	1	1	11	0.916667	1	4	4	4	4	16	4	4	4	4	4	16	4	4
889	South	South	Female	65	60-69	Single	Buddhist	Govt. employee	32000	1000 and over	Higher education (above bachelor)	Good	1	Yes	4	3	3	3	13	0	3.25	1	1	1	1	1	1	0	1	1	1	1	1	11	0.916667	1	4	4	4	4	16	4	3	3	4	4	14	3.5	4
890	South	South	Female	63	60-69	Married	Buddhist	Non-govt. employee	15000	1000 and over	Bachelor	Good	2	Yes	3	3	3	3	12	0	3	1	1	1	1	1	1	0	1	1	1	1	1	11	0.916667	1	4	3	4	4	15	3.75	4	4	4	4	16	4	4
891	South	South	Male	63	60-69	Married	Buddhist	Non-govt. employee	10000	1000 and over	Lower education (below bachelor)	Good	3	Yes	3	3	3	3	12	0	3	1	1	1	1	1	1	0	1	1	0	1	1	10	0.833333	1	4	4	4	3	15	3.75	4	4	4	4	16	4	4
892	South	South	Male	65	60-69	Single	Buddhist	Non-govt. employee	7000	1000 and over	Lower education (below bachelor)	Good	0	No	3	4	3	3	13	0	3.25	1	1	1	1	1	1	1	1	1	0	1	1	11	0.916667	1	4	4	4	4	16	4	4	2	4	4	14	3.5	4
893	South	South	Male	68	60-69	Married	Buddhist	Non-govt. employee	1200	1000 and over	Lower education (below bachelor)	Good	3	Yes	3	3	3	3	12	0	3	1	1	0	0	1	1	1	1	1	1	1	1	10	0.833333	1	4	4	3	3	14	3.5	4	4	4	4	16	4	4
894	South	South	Male	63	60-69	Married	Buddhist	Non-govt. employee	9000	1000 and over	Lower education (below bachelor)	Good	0	No	3	4	3	3	13	0	3.25	1	1	1	1	1	1	1	1	1	1	1	1	12	1	1	4	4	4	3	15	3.75	4	4	4	4	16	4	4
895	South	South	Female	61	60-69	Married	Buddhist	Non-govt. employee	8000	1000 and over	Lower education (below bachelor)	Good	2	Yes	3	4	3	3	13	0	3.25	1	1	1	1	1	1	0	1	1	1	1	1	11	0.916667	1	4	3	4	4	15	3.75	4	4	4	4	16	4	4
896	South	South	Male	63	60-69	Single	Buddhist	Non-govt. employee	14000	1000 and over	Lower education (below bachelor)	Good	0	No	3	4	3	3	13	0	3.25	1	1	1	1	1	1	0	1	1	0	1	1	10	0.833333	1	4	4	4	4	16	4	4	4	4	4	16	4	4
897	South	South	Female	60	60-69	Single	Buddhist	Non-govt. employee	7000	1000 and over	Lower education (below bachelor)	Good	2	Yes	3	4	3	4	14	1	3.5	1	1	1	1	0	1	0	1	1	1	1	1	10	0.833333	1	4	3	4	4	15	3.75	4	4	4	4	16	4	4
898	South	South	Female	66	60-69	Divorced	Buddhist	Non-govt. employee	7000	1000 and over	Lower education (below bachelor)	Good	0	No	3	3	3	3	12	0	3	1	1	1	1	1	1	1	1	1	0	1	1	11	0.916667	1	4	4	4	4	16	4	4	4	4	4	16	4	4
899	South	South	Female	62	60-69	Married	Buddhist	Non-govt. employee	10000	1000 and over	Lower education (below bachelor)	Good	0	No	3	4	4	3	14	1	3.5	1	1	1	1	1	1	1	1	1	1	1	1	12	1	1	4	4	4	3	15	3.75	4	3	4	4	15	3.75	4
900	South	South	Male	61	60-69	Married	Buddhist	Non-govt. employee	10000	1000 and over	Lower education (below bachelor)	Good	0	No	3	4	3	4	14	1	3.5	1	1	1	1	1	1	1	1	1	0	1	1	11	0.916667	1	4	4	4	4	16	4	4	4	4	4	16	4	4
901	South	South	Female	64	60-69	Married	Buddhist	Non-govt. employee	8000	1000 and over	Lower education (below bachelor)	Good	0	No	3	4	3	3	13	0	3.25	1	1	1	1	1	1	1	1	1	1	1	1	12	1	1	4	4	3	3	14	3.5	4	3	4	4	15	3.75	4
902	South	South	Male	65	60-69	Divorced	Buddhist	Non-govt. employee	6000	1000 and over	Lower education (below bachelor)	Bad	0	No	3	3	3	4	13	0	3.25	1	1	0	1	1	1	1	1	1	1	1	1	11	0.916667	1	4	4	3	3	14	3.5	4	4	4	4	16	4	4
903	South	South	Female	60	60-69	Married	Buddhist	Non-govt. employee	6000	1000 and over	Uneducated	Bad	0	No	4	4	3	4	15	1	3.75	1	1	0	1	1	1	1	1	1	1	0	1	10	0.833333	1	4	4	4	4	16	4	4	4	4	4	16	4	4
904	South	South	Male	73	70 and over	Married	Buddhist	Unemployed	2000	1000 and over	Lower education (below bachelor)	Good	1	Yes	4	3	3	4	14	1	3.5	1	1	1	1	1	1	0	0	1	1	1	1	10	0.833333	1	4	4	4	3	15	3.75	4	4	4	4	16	4	4
905	South	South	Female	69	60-69	Married	Buddhist	Unemployed	600	Less than 1000	Lower education (below bachelor)	Neutral	4	Yes	4	4	3	3	14	1	3.5	1	1	1	1	1	1	1	1	1	1	0	1	11	0.916667	1	4	4	3	4	15	3.75	4	3	4	4	15	3.75	4
906	South	South	Female	62	60-69	Married	Buddhist	Non-govt. employee	700	Less than 1000	Lower education (below bachelor)	Neutral	1	Yes	3	3	3	3	12	0	3	1	1	1	1	1	1	1	1	1	0	1	1	11	0.916667	1	3	3	4	4	14	3.5	3	4	4	4	15	3.75	4
907	South	South	Female	75	70 and over	Divorced	Buddhist	Unemployed	700	Less than 1000	Lower education (below bachelor)	Neutral	2	Yes	4	4	3	3	14	1	3.5	1	0	1	1	0	1	0	1	1	1	1	1	9	0.75	0	4	3	4	4	15	3.75	3	4	4	4	15	3.75	4
908	South	South	Female	60	60-69	Married	Islam	Non-govt. employee	1500	1000 and over	Lower education (below bachelor)	Neutral	3	Yes	4	4	3	3	14	1	3.5	1	1	1	1	0	1	1	1	1	0	1	1	10	0.833333	1	4	4	4	4	16	4	4	4	4	4	16	4	4
909	South	South	Female	63	60-69	Married	Islam	Non-govt. employee	3500	1000 and over	Lower education (below bachelor)	Neutral	1	Yes	4	4	3	3	14	1	3.5	1	1	1	1	1	1	0	1	1	0	1	1	10	0.833333	1	4	4	4	4	16	4	4	4	4	4	16	4	4
910	South	South	Female	64	60-69	Married	Islam	Non-govt. employee	4000	1000 and over	Lower education (below bachelor)	Neutral	1	Yes	4	4	3	3	14	1	3.5	1	1	1	1	1	1	1	1	1	0	1	1	11	0.916667	1	4	4	4	4	16	4	4	4	4	4	16	4	4
[truncated: 18 more columns]
